# Supplementary material for: Pyruvate:ferredoxin oxidoreductase and low abundant ferredoxins support aerobic photomixotrophic growth in cyanobacteria
Source: eLife journal article supplement (doi:10.7554/elife.71339), 2022-02-09

Figure 3 - figure supplement 2 - source data - 1

(1) Original file of full uncropped raw, unedited gel

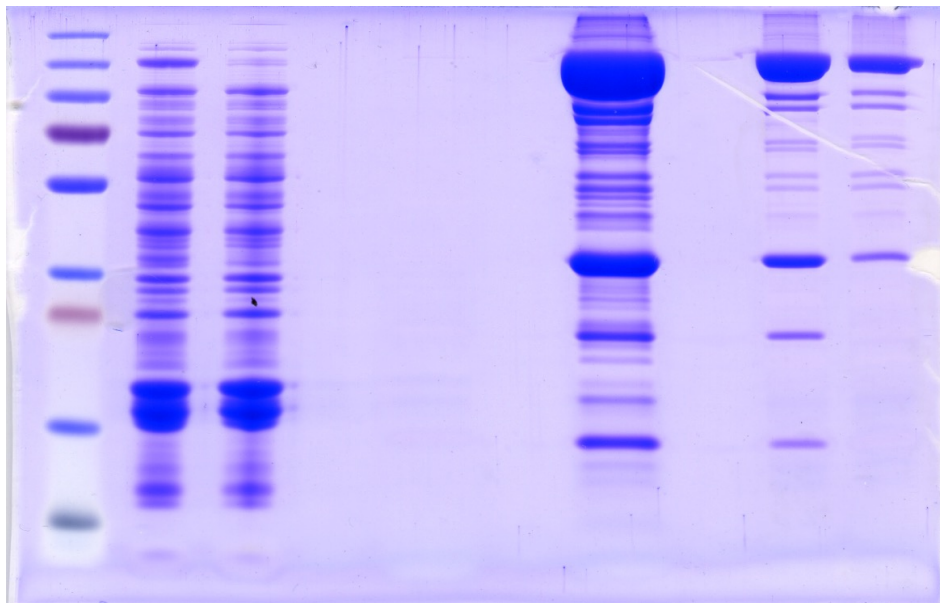

Figure 3 - figure supplement 2 - source data - 2

(2) Original file of full uncropped raw gel with relevant bands clearly labelled

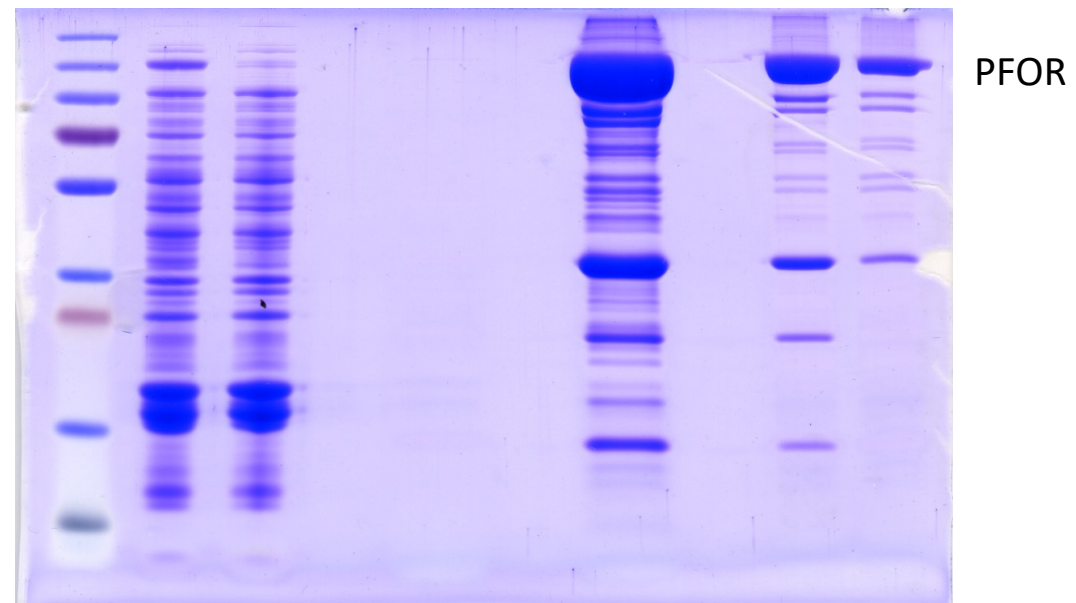

Supplement: fig2-figsupp2-data1 [file elife-71339-fig2-figsupp2-data1-v2.pdf]
