# Supplementary material for: Pyruvate:ferredoxin oxidoreductase and low abundant ferredoxins support aerobic photomixotrophic growth in cyanobacteria
Source: eLife. 2022 Feb 9;11:e71339. doi: 10.7554/eLife.71339 (PMC8887894; doi:10.7554/eLife.71339)
Supplement: Figure 1—figure supplement 1—source data 1. [file elife-71339-fig1-figsupp1-data1.xlsx]

## Sheet: NdhA
Description	with PFOR	with NifDK	Scientific Name	Max Score	Total Score	Query Cover	E value	Per. ident	Acc. Len	Accession
[Phormidium] sp. ETS-05 chromosome, complete genome	P		[Phormidium] sp. ETS-05	541	541	1	2e-174	73.68	6286783	=HYPERLINK("https://www.ncbi.nlm.nih.gov/nucleotide/NZ_CP051168.1?report=genbank&log$=nucltop&blast_rank=61&RID=E5SYZANR013","NZ_CP051168.1")
Acaryochloris marina MBIC11017, complete sequence	P		Acaryochloris marina MBIC11017	523	523	1	5e-168	71.64	6503724	=HYPERLINK("https://www.ncbi.nlm.nih.gov/nucleotide/NC_009925.1?report=genbank&log$=nucltop&blast_rank=115&RID=E5SYZANR013","NC_009925.1")
Anabaena cylindrica PCC 7122, complete sequence	P	DK	Anabaena cylindrica PCC 7122	541	541	1	2e-174	74.64	6395836	=HYPERLINK("https://www.ncbi.nlm.nih.gov/nucleotide/NC_019771.1?report=genbank&log$=nucltop&blast_rank=64&RID=E5SYZANR013","NC_019771.1")
Anabaena sp. 90 chromosome chANA02, complete sequence	P	DK	Anabaena sp. 90	540	540	1	6e-174	74.93	819965	=HYPERLINK("https://www.ncbi.nlm.nih.gov/nucleotide/NC_019439.1?report=genbank&log$=nucltop&blast_rank=72&RID=E5SYZANR013","NC_019439.1")
Anabaena sp. WA102, complete sequence	P	DK	Anabaena sp. WA102	540	540	1	6e-174	74.93	5705437	=HYPERLINK("https://www.ncbi.nlm.nih.gov/nucleotide/NZ_CP011456.1?report=genbank&log$=nucltop&blast_rank=73&RID=E5SYZANR013","NZ_CP011456.1")
Anabaena sp. YBS01 chromosome, complete genome	P	DK	Anabaena sp. YBS01	543	543	1	4e-175	74.27	7013200	=HYPERLINK("https://www.ncbi.nlm.nih.gov/nucleotide/NZ_CP034058.1?report=genbank&log$=nucltop&blast_rank=51&RID=E5SYZANR013","NZ_CP034058.1")
Aphanizomenon flos-aquae DEX188 chromosome, complete genome	P	DK	Aphanizomenon flos-aquae DEX188	536	536	1	8e-173	74.34	4538078	=HYPERLINK("https://www.ncbi.nlm.nih.gov/nucleotide/CP051188.1?report=genbank&log$=nucltop&blast_rank=91&RID=E5SYZANR013","CP051188.1")
Aphanizomenon flos-aquae KM1D3_PB chromosome, complete genome	P	DK	Aphanizomenon flos-aquae KM1D3_PB	538	538	1	2e-173	74.93	6071322	=HYPERLINK("https://www.ncbi.nlm.nih.gov/nucleotide/CP051528.1?report=genbank&log$=nucltop&blast_rank=83&RID=E5SYZANR013","CP051528.1")
Arthrospira sp. PCC 9108 chromosome, complete genome	P		Arthrospira sp. PCC 9108	541	541	1	2e-174	72.81	6763964	=HYPERLINK("https://www.ncbi.nlm.nih.gov/nucleotide/NZ_CP066886.1?report=genbank&log$=nucltop&blast_rank=63&RID=E5SYZANR013","NZ_CP066886.1")
Arthrospira sp. TJSD092 chromosome, complete genome	P		Arthrospira sp. TJSD092	540	540	1	6e-174	72.51	6434389	=HYPERLINK("https://www.ncbi.nlm.nih.gov/nucleotide/NZ_CP028914.1?report=genbank&log$=nucltop&blast_rank=71&RID=E5SYZANR013","NZ_CP028914.1")
Calothrix sp. 336/3 chromosome, complete genome	P	DK	Calothrix sp. 336/3	538	538	1	2e-173	74.64	6283267	=HYPERLINK("https://www.ncbi.nlm.nih.gov/nucleotide/NZ_CP011382.1?report=genbank&log$=nucltop&blast_rank=84&RID=E5SYZANR013","NZ_CP011382.1")
Calothrix sp. NIES-2098 DNA, complete genome	P	DK	Calothrix sp. NIES-2098	551	551	1	9e-178	75.80	8656060	=HYPERLINK("https://www.ncbi.nlm.nih.gov/nucleotide/NZ_AP018172.1?report=genbank&log$=nucltop&blast_rank=30&RID=E5SYZANR013","NZ_AP018172.1")
Calothrix sp. NIES-3974 chromosome, complete genome	P	DK	Calothrix sp. NIES-3974	555	555	1	2e-179	75.73	5985875	=HYPERLINK("https://www.ncbi.nlm.nih.gov/nucleotide/NZ_AP018254.1?report=genbank&log$=nucltop&blast_rank=19&RID=E5SYZANR013","NZ_AP018254.1")
Calothrix sp. NIES-4071 DNA, complete genome	P	DK	Calothrix sp. NIES-4071	527	527	1	1e-169	73.68	11064963	=HYPERLINK("https://www.ncbi.nlm.nih.gov/nucleotide/NZ_AP018255.1?report=genbank&log$=nucltop&blast_rank=105&RID=E5SYZANR013","NZ_AP018255.1")
Calothrix sp. NIES-4101 DNA, complete genome	P	DK	Calothrix sp. NIES-4101	542	795	1	6e-175	75.15	7235916	=HYPERLINK("https://www.ncbi.nlm.nih.gov/nucleotide/AP018280.1?report=genbank&log$=nucltop&blast_rank=53&RID=E5SYZANR013","AP018280.1")
Calothrix sp. PCC 6303, complete sequence	P	DK	Calothrix sp. PCC 6303	528	528	1	9e-170	73.10	6767834	=HYPERLINK("https://www.ncbi.nlm.nih.gov/nucleotide/NC_019751.1?report=genbank&log$=nucltop&blast_rank=104&RID=E5SYZANR013","NC_019751.1")
Calothrix sp. PCC 7507, complete sequence	P	DK	Calothrix sp. PCC 7507	547	547	1	2e-176	75.15	7023215	=HYPERLINK("https://www.ncbi.nlm.nih.gov/nucleotide/NC_019682.1?report=genbank&log$=nucltop&blast_rank=37&RID=E5SYZANR013","NC_019682.1")
Chondrocystis sp. NIES-4102 DNA, complete genome			Chondrocystis sp. NIES-4102	542	542	1	1e-174	72.51	4516676	=HYPERLINK("https://www.ncbi.nlm.nih.gov/nucleotide/NZ_AP018281.1?report=genbank&log$=nucltop&blast_rank=55&RID=E5SYZANR013","NZ_AP018281.1")
Chroococcidiopsis thermalis PCC 7203, complete sequence	P	DK	Chroococcidiopsis thermalis PCC 7203	525	525	1	7e-169	75.15	6315792	=HYPERLINK("https://www.ncbi.nlm.nih.gov/nucleotide/NC_019695.1?report=genbank&log$=nucltop&blast_rank=109&RID=E5SYZANR013","NC_019695.1")
Crinalium epipsammum PCC 9333, complete sequence			Crinalium epipsammum PCC 9333	531	531	1	5e-171	72.22	5315554	=HYPERLINK("https://www.ncbi.nlm.nih.gov/nucleotide/NC_019753.1?report=genbank&log$=nucltop&blast_rank=102&RID=E5SYZANR013","NC_019753.1")
Crocosphaera subtropica ATCC 51142 chromosome circular, complete sequence	P	DK	Crocosphaera subtropica ATCC 51142	545	545	1	8e-176	73.39	4934271	=HYPERLINK("https://www.ncbi.nlm.nih.gov/nucleotide/NC_010546.1?report=genbank&log$=nucltop&blast_rank=43&RID=E5SYZANR013","NC_010546.1")
Cyanobacterium aponinum PCC 10605, complete sequence			Cyanobacterium aponinum PCC 10605	533	533	1	1e-171	71.64	4114099	=HYPERLINK("https://www.ncbi.nlm.nih.gov/nucleotide/NC_019776.1?report=genbank&log$=nucltop&blast_rank=100&RID=E5SYZANR013","NC_019776.1")
Cyanobacterium sp. HL-69 chromosome, complete genome			Cyanobacterium sp. HL-69	541	541	0.99	2e-174	72.73	3155247	=HYPERLINK("https://www.ncbi.nlm.nih.gov/nucleotide/CP024912.1?report=genbank&log$=nucltop&blast_rank=62&RID=E5SYZANR013","CP024912.1")
Cyanobacterium stanieri PCC 7202, complete genome			Cyanobacterium stanieri PCC 7202	538	538	0.99	2e-173	72.14	3163381	=HYPERLINK("https://www.ncbi.nlm.nih.gov/nucleotide/NC_019778.1?report=genbank&log$=nucltop&blast_rank=81&RID=E5SYZANR013","NC_019778.1")
Cyanobium gracile PCC 6307, complete sequence	P		Cyanobium gracile PCC 6307	453	453	0.95	8e-144	68.20	3342364	=HYPERLINK("https://www.ncbi.nlm.nih.gov/nucleotide/NC_019675.1?report=genbank&log$=nucltop&blast_rank=200&RID=E5SYZANR013","NC_019675.1")
Cyanobium sp. M30B3 chromosome, complete genome	P		Cyanobium sp. M30B3	469	469	0.95	2e-149	68.81	3180296	=HYPERLINK("https://www.ncbi.nlm.nih.gov/nucleotide/NZ_CP073761.1?report=genbank&log$=nucltop&blast_rank=179&RID=E5SYZANR013","NZ_CP073761.1")
Cyanobium sp. NIES-981 chromosome I, complete sequence	P		Cyanobium sp. NIES-981	472	472	0.99	2e-150	65.59	3021545	=HYPERLINK("https://www.ncbi.nlm.nih.gov/nucleotide/NZ_LT578417.1?report=genbank&log$=nucltop&blast_rank=160&RID=E5SYZANR013","NZ_LT578417.1")
Cyanobium sp. NS01 chromosome, complete genome	P		Cyanobium sp. NS01	479	479	0.95	6e-153	68.20	2748087	=HYPERLINK("https://www.ncbi.nlm.nih.gov/nucleotide/NZ_CP047940.1?report=genbank&log$=nucltop&blast_rank=138&RID=E5SYZANR013","NZ_CP047940.1")
Cyanothece sp. PCC 7425, complete sequence	P	DK	Cyanothece sp. PCC 7425	540	540	1	3e-174	76.02	5374574	=HYPERLINK("https://www.ncbi.nlm.nih.gov/nucleotide/NC_011884.1?report=genbank&log$=nucltop&blast_rank=65&RID=E5SYZANR013","NC_011884.1")
Cylindrospermopsis curvispora GIHE-G1 chromosome, complete genome	P	DK	Cylindrospermopsis curvispora GIHE-G1	536	536	1	1e-172	74.34	3910736	=HYPERLINK("https://www.ncbi.nlm.nih.gov/nucleotide/NZ_CP060822.1?report=genbank&log$=nucltop&blast_rank=96&RID=E5SYZANR013","NZ_CP060822.1")
Cylindrospermopsis raciborskii N8 chromosome, complete genome	P	DK	Cylindrospermopsis raciborskii N8	537	537	1	4e-173	74.64	3857174	=HYPERLINK("https://www.ncbi.nlm.nih.gov/nucleotide/NZ_CP073250.1?report=genbank&log$=nucltop&blast_rank=88&RID=E5SYZANR013","NZ_CP073250.1")
Dactylococcopsis salina PCC 8305, complete sequence			Dactylococcopsis salina PCC 8305	550	550	1	1e-177	75.15	3781008	=HYPERLINK("https://www.ncbi.nlm.nih.gov/nucleotide/NC_019780.1?report=genbank&log$=nucltop&blast_rank=31&RID=E5SYZANR013","NC_019780.1")
Dolichospermum flos-aquae CCAP 1403/13F chromosome, complete genome	P	DK	Dolichospermum flos-aquae CCAP 1403/13F	539	539	1	9e-174	74.64	5151752	=HYPERLINK("https://www.ncbi.nlm.nih.gov/nucleotide/NZ_CP051206.1?report=genbank&log$=nucltop&blast_rank=78&RID=E5SYZANR013","NZ_CP051206.1")
Dolichospermum sp. DET69 chromosome, complete genome	P	DK	Dolichospermum sp. DET69	537	537	1	4e-173	74.34	5839262	=HYPERLINK("https://www.ncbi.nlm.nih.gov/nucleotide/CP070233.1?report=genbank&log$=nucltop&blast_rank=87&RID=E5SYZANR013","CP070233.1")
Dolichospermum sp. DL01 chromosome, complete genome	P	DK	Dolichospermum sp. DL01	539	539	1	9e-174	74.64	4827232	=HYPERLINK("https://www.ncbi.nlm.nih.gov/nucleotide/CP050884.1?report=genbank&log$=nucltop&blast_rank=79&RID=E5SYZANR013","CP050884.1")
Dolichospermum sp. LBC05a chromosome, complete genome	P	DK	Dolichospermum sp. LBC05a	540	540	1	6e-174	74.93	5178591	=HYPERLINK("https://www.ncbi.nlm.nih.gov/nucleotide/CP050882.1?report=genbank&log$=nucltop&blast_rank=69&RID=E5SYZANR013","CP050882.1")
Dolichospermum sp. UHCC 0315A chromosome, complete genome	P	DK	Dolichospermum sp. UHCC 0315A	538	538	1	2e-173	74.64	5407479	=HYPERLINK("https://www.ncbi.nlm.nih.gov/nucleotide/NZ_CP043056.1?report=genbank&log$=nucltop&blast_rank=82&RID=E5SYZANR013","NZ_CP043056.1")
Dolichospermum sp. UKL201 chromosome, complete genome	P	DK	Dolichospermum sp. UKL201	538	538	1	1e-173	74.34	5294355	=HYPERLINK("https://www.ncbi.nlm.nih.gov/nucleotide/CP050891.1?report=genbank&log$=nucltop&blast_rank=80&RID=E5SYZANR013","CP050891.1")
Euhalothece natronophila Z-M001 chromosome, complete genome		DK	Euhalothece natronophila Z-M001	539	539	1	9e-174	72.81	3326959	=HYPERLINK("https://www.ncbi.nlm.nih.gov/nucleotide/NZ_CP042326.1?report=genbank&log$=nucltop&blast_rank=74&RID=E5SYZANR013","NZ_CP042326.1")
Fischerella sp. NIES-3754 chromosome, complete genome	P	DK	Fischerella sp. NIES-3754	543	543	1	3e-175	75.51	5821603	=HYPERLINK("https://www.ncbi.nlm.nih.gov/nucleotide/NZ_AP017305.1?report=genbank&log$=nucltop&blast_rank=47&RID=E5SYZANR013","NZ_AP017305.1")
Geitlerinema sp. PCC 7407, complete sequence	P		Geitlerinema sp. PCC 7407	561	561	1	0.0	78.65	4681111	=HYPERLINK("https://www.ncbi.nlm.nih.gov/nucleotide/NC_019703.1?report=genbank&log$=nucltop&blast_rank=11&RID=E5SYZANR013","NC_019703.1")
Geminocystis sp. NIES-3708 chromosome, complete genome			Geminocystis sp. NIES-3708	536	630	1	7e-173	71.64	3883409	=HYPERLINK("https://www.ncbi.nlm.nih.gov/nucleotide/NZ_AP014815.1?report=genbank&log$=nucltop&blast_rank=90&RID=E5SYZANR013","NZ_AP014815.1")
Geminocystis sp. NIES-3709 chromosome, complete genome			Geminocystis sp. NIES-3709	525	525	0.99	9e-169	70.09	4150181	=HYPERLINK("https://www.ncbi.nlm.nih.gov/nucleotide/NZ_AP014821.1?report=genbank&log$=nucltop&blast_rank=111&RID=E5SYZANR013","NZ_AP014821.1")
Gloeobacter kilaueensis JS1, complete sequence			Gloeobacter kilaueensis JS1	452	452	1	1e-143	64.04	4724791	=HYPERLINK("https://www.ncbi.nlm.nih.gov/nucleotide/NC_022600.1?report=genbank&log$=nucltop&blast_rank=201&RID=E5SYZANR013","NC_022600.1")
Gloeobacter violaceus PCC 7421, complete sequence			Gloeobacter violaceus PCC 7421	459	986	1	5e-146	66.08	4659019	=HYPERLINK("https://www.ncbi.nlm.nih.gov/nucleotide/NC_005125.1?report=genbank&log$=nucltop&blast_rank=196&RID=E5SYZANR013","NC_005125.1")
Gloeobacteraceae cyanobacterium 'cyano 109' chromosome, complete genome			Gloeobacteraceae cyanobacterium 'cyano 109'	432	578	1	2e-136	61.70	4187797	=HYPERLINK("https://www.ncbi.nlm.nih.gov/nucleotide/CP062698.1?report=genbank&log$=nucltop&blast_rank=204&RID=E5SYZANR013","CP062698.1")
Gloeocapsa sp. PCC 7428, complete sequence			Gloeocapsa sp. PCC 7428	548	548	1	7e-177	74.56	5431448	=HYPERLINK("https://www.ncbi.nlm.nih.gov/nucleotide/NC_019745.1?report=genbank&log$=nucltop&blast_rank=35&RID=E5SYZANR013","NC_019745.1")
Gloeothece citriformis PCC 7424, complete sequence	P	DK	Gloeothece citriformis PCC 7424	555	555	1	3e-179	73.98	5942652	=HYPERLINK("https://www.ncbi.nlm.nih.gov/nucleotide/NC_011729.1?report=genbank&log$=nucltop&blast_rank=22&RID=E5SYZANR013","NC_011729.1")
Gloeothece verrucosa PCC 7822, complete sequence	P	DK	Gloeothece verrucosa PCC 7822	553	553	1	8e-179	74.56	6091620	=HYPERLINK("https://www.ncbi.nlm.nih.gov/nucleotide/NC_014501.1?report=genbank&log$=nucltop&blast_rank=25&RID=E5SYZANR013","NC_014501.1")
Halomicronema hongdechloris C2206 chromosome			Halomicronema hongdechloris C2206	526	526	1	4e-169	72.51	5577845	=HYPERLINK("https://www.ncbi.nlm.nih.gov/nucleotide/NZ_CP021983.2?report=genbank&log$=nucltop&blast_rank=107&RID=E5SYZANR013","NZ_CP021983.2")
Halothece sp. PCC 7418, complete sequence	P	DK	Halothece sp. PCC 7418	521	521	1	2e-167	74.56	4179170	=HYPERLINK("https://www.ncbi.nlm.nih.gov/nucleotide/NC_019779.1?report=genbank&log$=nucltop&blast_rank=119&RID=E5SYZANR013","NC_019779.1")
Leptolyngbya boryana dg5 chromosome		DK	Leptolyngbya boryana dg5	539	791	1	9e-174	73.98	6176365	=HYPERLINK("https://www.ncbi.nlm.nih.gov/nucleotide/NZ_AP014642.1?report=genbank&log$=nucltop&blast_rank=75&RID=E5SYZANR013","NZ_AP014642.1")
Leptolyngbya boryana IAM M-101 chromosome		DK	Leptolyngbya boryana IAM M-101	539	791	1	9e-174	73.98	6176364	=HYPERLINK("https://www.ncbi.nlm.nih.gov/nucleotide/NZ_AP014638.1?report=genbank&log$=nucltop&blast_rank=76&RID=E5SYZANR013","NZ_AP014638.1")
Leptolyngbya boryana NIES-2135 DNA, complete genome		DK	Leptolyngbya boryana NIES-2135	539	791	1	9e-174	73.98	6255463	=HYPERLINK("https://www.ncbi.nlm.nih.gov/nucleotide/NZ_AP018203.1?report=genbank&log$=nucltop&blast_rank=77&RID=E5SYZANR013","NZ_AP018203.1")
Leptolyngbya sp. BL0902 chromosome, complete genome	P		Leptolyngbya sp. BL0902	546	546	1	3e-176	77.19	4309234	=HYPERLINK("https://www.ncbi.nlm.nih.gov/nucleotide/NZ_CP046155.1?report=genbank&log$=nucltop&blast_rank=39&RID=E5SYZANR013","NZ_CP046155.1")
Leptolyngbya sp. NIES-3755 DNA, complete genome			Leptolyngbya sp. NIES-3755	533	533	1	1e-171	73.39	6244812	=HYPERLINK("https://www.ncbi.nlm.nih.gov/nucleotide/NZ_AP017308.1?report=genbank&log$=nucltop&blast_rank=101&RID=E5SYZANR013","NZ_AP017308.1")
Leptolyngbya sp. O-77 chromosome, complete genome			Leptolyngbya sp. O-77	553	553	1	1e-178	76.61	5480261	=HYPERLINK("https://www.ncbi.nlm.nih.gov/nucleotide/NZ_AP017367.1?report=genbank&log$=nucltop&blast_rank=26&RID=E5SYZANR013","NZ_AP017367.1")
Leptolyngbya sp. PCC 7376, complete sequence			Leptolyngbya sp. PCC 7376	540	540	1	5e-174	73.68	5125950	=HYPERLINK("https://www.ncbi.nlm.nih.gov/nucleotide/NC_019683.1?report=genbank&log$=nucltop&blast_rank=68&RID=E5SYZANR013","NC_019683.1")
Limnospira fusiformis SAG 85.79 chromosome, complete genome	P		Limnospira fusiformis SAG 85.79	540	540	1	6e-174	72.51	6423694	=HYPERLINK("https://www.ncbi.nlm.nih.gov/nucleotide/NZ_CP051185.1?report=genbank&log$=nucltop&blast_rank=70&RID=E5SYZANR013","NZ_CP051185.1")
Microcoleus sp. PCC 7113, complete sequence	P	DK	Microcoleus sp. PCC 7113	555	555	1	3e-179	76.02	7470429	=HYPERLINK("https://www.ncbi.nlm.nih.gov/nucleotide/NC_019738.1?report=genbank&log$=nucltop&blast_rank=20&RID=E5SYZANR013","NC_019738.1")
Microcystis aeruginosa FD4 chromosome, complete genome	P		Microcystis aeruginosa FD4	517	517	1	4e-166	74.27	5449501	=HYPERLINK("https://www.ncbi.nlm.nih.gov/nucleotide/NZ_CP046973.1?report=genbank&log$=nucltop&blast_rank=122&RID=E5SYZANR013","NZ_CP046973.1")
Microcystis aeruginosa NIES-2481 chromosome, complete genome	P		Microcystis aeruginosa NIES-2481	521	521	1	2e-167	74.56	4293006	=HYPERLINK("https://www.ncbi.nlm.nih.gov/nucleotide/NZ_CP012375.1?report=genbank&log$=nucltop&blast_rank=117&RID=E5SYZANR013","NZ_CP012375.1")
Microcystis aeruginosa NIES-2549 chromosome, complete genome	P		Microcystis aeruginosa NIES-2549	521	521	1	2e-167	74.56	4294213	=HYPERLINK("https://www.ncbi.nlm.nih.gov/nucleotide/NZ_CP011304.1?report=genbank&log$=nucltop&blast_rank=118&RID=E5SYZANR013","NZ_CP011304.1")
Microcystis aeruginosa NIES-298 chromosome, complete genome	P		Microcystis aeruginosa NIES-298	500	500	1	4e-160	73.98	4997809	=HYPERLINK("https://www.ncbi.nlm.nih.gov/nucleotide/NZ_CP046058.1?report=genbank&log$=nucltop&blast_rank=130&RID=E5SYZANR013","NZ_CP046058.1")
Microcystis aeruginosa NIES-843, complete sequence	P		Microcystis aeruginosa NIES-843	518	518	1	3e-166	74.27	5842795	=HYPERLINK("https://www.ncbi.nlm.nih.gov/nucleotide/NC_010296.1?report=genbank&log$=nucltop&blast_rank=120&RID=E5SYZANR013","NC_010296.1")
Microcystis aeruginosa PCC 7806SL, complete genome	P		Microcystis aeruginosa PCC 7806SL	500	500	1	4e-160	73.98	5139339	=HYPERLINK("https://www.ncbi.nlm.nih.gov/nucleotide/NZ_CP020771.1?report=genbank&log$=nucltop&blast_rank=131&RID=E5SYZANR013","NZ_CP020771.1")
Microcystis panniformis FACHB-1757 chromosome, complete genome	P		Microcystis panniformis FACHB-1757	500	500	1	3e-160	74.27	5686839	=HYPERLINK("https://www.ncbi.nlm.nih.gov/nucleotide/NZ_CP011339.1?report=genbank&log$=nucltop&blast_rank=128&RID=E5SYZANR013","NZ_CP011339.1")
Microcystis sp. MC19 chromosome, complete genome	P		Microcystis sp. MC19	500	500	1	3e-160	74.27	5020243	=HYPERLINK("https://www.ncbi.nlm.nih.gov/nucleotide/NZ_CP020664.1?report=genbank&log$=nucltop&blast_rank=127&RID=E5SYZANR013","NZ_CP020664.1")
Microcystis viridis NIES-102 chromosome, complete genome	P		Microcystis viridis NIES-102	518	518	1	3e-166	74.27	5874197	=HYPERLINK("https://www.ncbi.nlm.nih.gov/nucleotide/NZ_AP019314.1?report=genbank&log$=nucltop&blast_rank=121&RID=E5SYZANR013","NZ_AP019314.1")
Moorea producens PAL-8-15-08-1 chromosome, complete genome			Moorea producens PAL-8-15-08-1	537	537	1	5e-173	73.39	9673108	=HYPERLINK("https://www.ncbi.nlm.nih.gov/nucleotide/NZ_CP017599.1?report=genbank&log$=nucltop&blast_rank=89&RID=E5SYZANR013","NZ_CP017599.1")
Nodularia spumigena UHCC 0039 chromosome, complete genome	P	DK	Nodularia spumigena UHCC 0039	546	546	1	3e-176	74.85	5294286	=HYPERLINK("https://www.ncbi.nlm.nih.gov/nucleotide/NZ_CP020114.1?report=genbank&log$=nucltop&blast_rank=40&RID=E5SYZANR013","NZ_CP020114.1")
'Nostoc azollae' 0708, complete sequence	P	DK	'Nostoc azollae' 0708	536	536	1	9e-173	74.05	5354700	=HYPERLINK("https://www.ncbi.nlm.nih.gov/nucleotide/NC_014248.1?report=genbank&log$=nucltop&blast_rank=95&RID=E5SYZANR013","NC_014248.1")
Nostoc edaphicum CCNP1411 chromosome, complete genome	P	DK	Nostoc edaphicum CCNP1411	541	541	1	1e-174	74.27	7733505	=HYPERLINK("https://www.ncbi.nlm.nih.gov/nucleotide/NZ_CP054698.1?report=genbank&log$=nucltop&blast_rank=56&RID=E5SYZANR013","NZ_CP054698.1")
Nostoc flagelliforme CCNUN1 chromosome, complete genome	P	DK	Nostoc flagelliforme CCNUN1	541	541	1	1e-174	74.27	8363872	=HYPERLINK("https://www.ncbi.nlm.nih.gov/nucleotide/NZ_CP024785.1?report=genbank&log$=nucltop&blast_rank=60&RID=E5SYZANR013","NZ_CP024785.1")
Nostoc punctiforme PCC 73102, complete sequence	P	DK	Nostoc punctiforme PCC 73102	542	646	1	7e-175	74.27	8234322	=HYPERLINK("https://www.ncbi.nlm.nih.gov/nucleotide/NC_010628.1?report=genbank&log$=nucltop&blast_rank=54&RID=E5SYZANR013","NC_010628.1")
Nostoc sp. ATCC 53789 chromosome, complete genome	P	DK	Nostoc sp. ATCC 53789	541	642	1	1e-174	73.98	7340101	=HYPERLINK("https://www.ncbi.nlm.nih.gov/nucleotide/NZ_CP046703.1?report=genbank&log$=nucltop&blast_rank=57&RID=E5SYZANR013","NZ_CP046703.1")
Nostoc sp. C052 chromosome, complete genome	P	DK	Nostoc sp. C052	549	549	1	3e-177	75.15	7828336	=HYPERLINK("https://www.ncbi.nlm.nih.gov/nucleotide/NZ_CP040272.1?report=genbank&log$=nucltop&blast_rank=33&RID=E5SYZANR013","NZ_CP040272.1")
Nostoc sp. C057 chromosome, complete genome	P	DK	Nostoc sp. C057	541	644	1	1e-174	73.98	7495445	=HYPERLINK("https://www.ncbi.nlm.nih.gov/nucleotide/NZ_CP040281.1?report=genbank&log$=nucltop&blast_rank=58&RID=E5SYZANR013","NZ_CP040281.1")
Nostoc sp. CENA543 chromosome, complete genome	P	DK	Nostoc sp. CENA543	551	551	1	7e-178	75.73	6990729	=HYPERLINK("https://www.ncbi.nlm.nih.gov/nucleotide/NZ_CP023278.1?report=genbank&log$=nucltop&blast_rank=29&RID=E5SYZANR013","NZ_CP023278.1")
Nostoc sp. HK-01 DNA, complete genome	P	DK	Nostoc sp. HK-01	555	555	1	2e-179	76.90	6494018	=HYPERLINK("https://www.ncbi.nlm.nih.gov/nucleotide/AP018318.1?report=genbank&log$=nucltop&blast_rank=17&RID=E5SYZANR013","AP018318.1")
Nostoc sp. 'Lobaria pulmonaria (5183) cyanobiont' strain 5183 chromosome, complete genome	P	DK	Nostoc sp. 'Lobaria pulmonaria (5183) cyanobiont'	544	544	1	1e-175	74.27	7061466	=HYPERLINK("https://www.ncbi.nlm.nih.gov/nucleotide/NZ_CP026692.1?report=genbank&log$=nucltop&blast_rank=44&RID=E5SYZANR013","NZ_CP026692.1")
Nostoc sp. NIES-3756 chromosome, complete genome	P	DK	Nostoc sp. NIES-3756	543	543	1	5e-175	74.56	6463965	=HYPERLINK("https://www.ncbi.nlm.nih.gov/nucleotide/NZ_AP017295.1?report=genbank&log$=nucltop&blast_rank=52&RID=E5SYZANR013","NZ_AP017295.1")
Nostoc sp. PCC 7107, complete sequence	P	DK	Nostoc sp. PCC 7107	561	561	1	0.0	77.78	6329823	=HYPERLINK("https://www.ncbi.nlm.nih.gov/nucleotide/NC_019676.1?report=genbank&log$=nucltop&blast_rank=12&RID=E5SYZANR013","NC_019676.1")
Nostoc sp. PCC 7120 = FACHB-418, complete sequence	P	DK	Nostoc sp. PCC 7120 = FACHB-418	543	543	1	4e-175	74.27	6413771	=HYPERLINK("https://www.ncbi.nlm.nih.gov/nucleotide/NC_003272.1?report=genbank&log$=nucltop&blast_rank=50&RID=E5SYZANR013","NC_003272.1")
Nostoc sp. PCC 7524, complete sequence	P	DK	Nostoc sp. PCC 7524	546	546	1	2e-176	75.44	6635030	=HYPERLINK("https://www.ncbi.nlm.nih.gov/nucleotide/NC_019684.1?report=genbank&log$=nucltop&blast_rank=38&RID=E5SYZANR013","NC_019684.1")
Nostoc sp. 'Peltigera membranacea cyanobiont' N6 chromosome, complete genome	P	DK	Nostoc sp. 'Peltigera membranacea cyanobiont' N6	543	543	1	2e-175	74.56	8214648	=HYPERLINK("https://www.ncbi.nlm.nih.gov/nucleotide/NZ_CP026681.1?report=genbank&log$=nucltop&blast_rank=46&RID=E5SYZANR013","NZ_CP026681.1")
Nostoc sp. TCL240-02 chromosome, complete genome	P	DK	Nostoc sp. TCL240-02	541	643	1	1e-174	73.98	7887247	=HYPERLINK("https://www.ncbi.nlm.nih.gov/nucleotide/NZ_CP040094.1?report=genbank&log$=nucltop&blast_rank=59&RID=E5SYZANR013","NZ_CP040094.1")
Nostoc sp. TCL26-01 chromosome, complete genome	P	DK	Nostoc sp. TCL26-01	547	547	1	2e-176	74.56	6765102	=HYPERLINK("https://www.ncbi.nlm.nih.gov/nucleotide/NZ_CP040297.1?report=genbank&log$=nucltop&blast_rank=36&RID=E5SYZANR013","NZ_CP040297.1")
Nostoc sp. UHCC 0702 chromosome, complete genome	P	DK	Nostoc sp. UHCC 0702	544	544	1	2e-175	74.85	8587404	=HYPERLINK("https://www.ncbi.nlm.nih.gov/nucleotide/NZ_CP071065.1?report=genbank&log$=nucltop&blast_rank=45&RID=E5SYZANR013","NZ_CP071065.1")
Nostoc sphaeroides CCNUC1 chromosome Gxm1, complete sequence	P	DK	Nostoc sphaeroides CCNUC1	540	540	1	4e-174	74.27	6481972	=HYPERLINK("https://www.ncbi.nlm.nih.gov/nucleotide/NZ_CP045226.1?report=genbank&log$=nucltop&blast_rank=66&RID=E5SYZANR013","NZ_CP045226.1")
Nostoc sphaeroides strain Kutzing En chromosome, complete genome	P	DK	Nostoc sphaeroides	540	540	1	4e-174	74.27	6531820	=HYPERLINK("https://www.ncbi.nlm.nih.gov/nucleotide/NZ_CP031941.1?report=genbank&log$=nucltop&blast_rank=67&RID=E5SYZANR013","NZ_CP031941.1")
Nostocales cyanobacterium HT-58-2, complete genome	P	DK	Nostocales cyanobacterium HT-58-2	548	548	1	4e-177	74.93	7846907	=HYPERLINK("https://www.ncbi.nlm.nih.gov/nucleotide/NZ_CP019636.1?report=genbank&log$=nucltop&blast_rank=34&RID=E5SYZANR013","NZ_CP019636.1")
Oscillatoria acuminata PCC 6304, complete sequence	P		Oscillatoria acuminata PCC 6304	535	535	1	2e-172	71.35	7689443	=HYPERLINK("https://www.ncbi.nlm.nih.gov/nucleotide/NC_019693.1?report=genbank&log$=nucltop&blast_rank=97&RID=E5SYZANR013","NC_019693.1")
Oscillatoria nigro-viridis PCC 7112, complete sequence	P		Oscillatoria nigro-viridis PCC 7112	523	523	1	3e-168	72.01	7479014	=HYPERLINK("https://www.ncbi.nlm.nih.gov/nucleotide/NC_019729.1?report=genbank&log$=nucltop&blast_rank=114&RID=E5SYZANR013","NC_019729.1")
Oxynema sp. AP17 chromosome, complete genome	P		Oxynema sp. AP17	534	534	1	4e-172	73.10	6357750	=HYPERLINK("https://www.ncbi.nlm.nih.gov/nucleotide/NZ_CP051167.1?report=genbank&log$=nucltop&blast_rank=99&RID=E5SYZANR013","NZ_CP051167.1")
Planktothrix agardhii NIES-204 DNA, complete genome	P		Planktothrix agardhii NIES-204	521	521	1	1e-167	73.68	4780238	=HYPERLINK("https://www.ncbi.nlm.nih.gov/nucleotide/AP017991.1?report=genbank&log$=nucltop&blast_rank=116&RID=E5SYZANR013","AP017991.1")
Pleurocapsa sp. PCC 7327, complete sequence	P		Pleurocapsa sp. PCC 7327	565	565	1	0.0	76.02	4986817	=HYPERLINK("https://www.ncbi.nlm.nih.gov/nucleotide/NC_019689.1?report=genbank&log$=nucltop&blast_rank=10&RID=E5SYZANR013","NC_019689.1")
Prochloraceae cyanobacterium LD05 chromosome, complete genome			Prochloraceae cyanobacterium LD05	500	500	1	3e-160	69.01	3839796	=HYPERLINK("https://www.ncbi.nlm.nih.gov/nucleotide/CP073341.1?report=genbank&log$=nucltop&blast_rank=129&RID=E5SYZANR013","CP073341.1")
Prochlorococcus marinus str. AS9601, complete sequence			Prochlorococcus marinus str. AS9601	472	472	0.99	2e-150	66.37	1669886	=HYPERLINK("https://www.ncbi.nlm.nih.gov/nucleotide/NC_008816.1?report=genbank&log$=nucltop&blast_rank=164&RID=E5SYZANR013","NC_008816.1")
Prochlorococcus marinus str. MIT 9215, complete sequence			Prochlorococcus marinus str. MIT 9215	471	471	0.99	4e-150	66.08	1738790	=HYPERLINK("https://www.ncbi.nlm.nih.gov/nucleotide/NC_009840.1?report=genbank&log$=nucltop&blast_rank=171&RID=E5SYZANR013","NC_009840.1")
Prochlorococcus marinus str. MIT 9301, complete sequence			Prochlorococcus marinus str. MIT 9301	471	471	0.99	7e-150	66.08	1641879	=HYPERLINK("https://www.ncbi.nlm.nih.gov/nucleotide/NC_009091.1?report=genbank&log$=nucltop&blast_rank=175&RID=E5SYZANR013","NC_009091.1")
Prochlorococcus marinus str. MIT 9303, complete genome	P		Prochlorococcus marinus str. MIT 9303	473	584	0.99	7e-151	65.19	2682675	=HYPERLINK("https://www.ncbi.nlm.nih.gov/nucleotide/NC_008820.1?report=genbank&log$=nucltop&blast_rank=155&RID=E5SYZANR013","NC_008820.1")
Prochlorococcus marinus str. MIT 9312, complete sequence			Prochlorococcus marinus str. MIT 9312	474	639	0.99	4e-151	66.37	1709204	=HYPERLINK("https://www.ncbi.nlm.nih.gov/nucleotide/NC_007577.1?report=genbank&log$=nucltop&blast_rank=151&RID=E5SYZANR013","NC_007577.1")
Prochlorococcus marinus str. MIT 9313, complete sequence	P		Prochlorococcus marinus str. MIT 9313	479	479	0.99	1e-152	66.08	2410873	=HYPERLINK("https://www.ncbi.nlm.nih.gov/nucleotide/NC_005071.1?report=genbank&log$=nucltop&blast_rank=141&RID=E5SYZANR013","NC_005071.1")
Prochlorococcus marinus str. MIT 9515, complete sequence			Prochlorococcus marinus str. MIT 9515	473	473	0.99	7e-151	66.96	1704176	=HYPERLINK("https://www.ncbi.nlm.nih.gov/nucleotide/NC_008817.1?report=genbank&log$=nucltop&blast_rank=154&RID=E5SYZANR013","NC_008817.1")
Prochlorococcus marinus str. NATL1A, complete sequence			Prochlorococcus marinus str. NATL1A	475	475	0.97	2e-151	68.07	1864731	=HYPERLINK("https://www.ncbi.nlm.nih.gov/nucleotide/NC_008819.1?report=genbank&log$=nucltop&blast_rank=148&RID=E5SYZANR013","NC_008819.1")
Prochlorococcus marinus str. NATL2A, complete sequence			Prochlorococcus marinus str. NATL2A	472	472	0.97	3e-150	67.77	1842899	=HYPERLINK("https://www.ncbi.nlm.nih.gov/nucleotide/NC_007335.2?report=genbank&log$=nucltop&blast_rank=169&RID=E5SYZANR013","NC_007335.2")
Prochlorococcus marinus subsp. marinus str. CCMP1375, complete sequence			Prochlorococcus marinus subsp. marinus str. CCMP1375	482	482	0.99	8e-154	67.16	1751080	=HYPERLINK("https://www.ncbi.nlm.nih.gov/nucleotide/NC_005042.1?report=genbank&log$=nucltop&blast_rank=134&RID=E5SYZANR013","NC_005042.1")
Prochlorococcus marinus subsp. pastoris str. CCMP1986, complete sequence			Prochlorococcus marinus subsp. pastoris str. CCMP1986	476	612	0.99	8e-152	67.26	1657990	=HYPERLINK("https://www.ncbi.nlm.nih.gov/nucleotide/NC_005072.1?report=genbank&log$=nucltop&blast_rank=146&RID=E5SYZANR013","NC_005072.1")
Prochlorococcus sp. MIT 0604 chromosome, complete genome			Prochlorococcus sp. MIT 0604	469	469	0.99	3e-149	65.78	1780061	=HYPERLINK("https://www.ncbi.nlm.nih.gov/nucleotide/NZ_CP007753.1?report=genbank&log$=nucltop&blast_rank=183&RID=E5SYZANR013","NZ_CP007753.1")
Prochlorococcus sp. MIT 0801 chromosome, complete genome			Prochlorococcus sp. MIT 0801	474	474	0.97	3e-151	68.67	1929203	=HYPERLINK("https://www.ncbi.nlm.nih.gov/nucleotide/NZ_CP007754.1?report=genbank&log$=nucltop&blast_rank=150&RID=E5SYZANR013","NZ_CP007754.1")
Pseudanabaena sp. ABRG5-3 chromosome, complete genome		DK	Pseudanabaena sp. ABRG5-3	477	477	0.97	5e-152	67.87	4796642	=HYPERLINK("https://www.ncbi.nlm.nih.gov/nucleotide/NZ_AP017560.1?report=genbank&log$=nucltop&blast_rank=145&RID=E5SYZANR013","NZ_AP017560.1")
Pseudanabaena sp. PCC 7367, complete sequence			Pseudanabaena sp. PCC 7367	479	479	0.97	1e-152	68.37	4557046	=HYPERLINK("https://www.ncbi.nlm.nih.gov/nucleotide/NC_019701.1?report=genbank&log$=nucltop&blast_rank=142&RID=E5SYZANR013","NC_019701.1")
Rippkaea orientalis PCC 8801, complete sequence	P	DK	Rippkaea orientalis PCC 8801	551	551	1	6e-178	73.68	4679413	=HYPERLINK("https://www.ncbi.nlm.nih.gov/nucleotide/NC_011726.1?report=genbank&log$=nucltop&blast_rank=28&RID=E5SYZANR013","NC_011726.1")
Rippkaea orientalis PCC 8802, complete sequence	P	DK	Rippkaea orientalis PCC 8802	551	551	1	6e-178	73.68	4669813	=HYPERLINK("https://www.ncbi.nlm.nih.gov/nucleotide/NC_013161.1?report=genbank&log$=nucltop&blast_rank=27&RID=E5SYZANR013","NC_013161.1")
Rivularia sp. PCC 7116, complete sequence	P	DK	Rivularia sp. PCC 7116	538	538	1	3e-173	72.81	8698463	=HYPERLINK("https://www.ncbi.nlm.nih.gov/nucleotide/NC_019678.1?report=genbank&log$=nucltop&blast_rank=85&RID=E5SYZANR013","NC_019678.1")
Stanieria cyanosphaera PCC 7437, complete sequence			Stanieria cyanosphaera PCC 7437	550	706	1	1e-177	73.68	5041209	=HYPERLINK("https://www.ncbi.nlm.nih.gov/nucleotide/NC_019748.1?report=genbank&log$=nucltop&blast_rank=32&RID=E5SYZANR013","NC_019748.1")
Stanieria sp. NIES-3757 DNA, complete genome	P		Stanieria sp. NIES-3757	545	545	1	6e-176	73.39	5319768	=HYPERLINK("https://www.ncbi.nlm.nih.gov/nucleotide/NZ_AP017375.1?report=genbank&log$=nucltop&blast_rank=42&RID=E5SYZANR013","NZ_AP017375.1")
Synechococcus elongatus PCC 6301, complete sequence	P		Synechococcus elongatus PCC 6301	536	536	1	9e-173	74.85	2696255	=HYPERLINK("https://www.ncbi.nlm.nih.gov/nucleotide/NC_006576.1?report=genbank&log$=nucltop&blast_rank=94&RID=E5SYZANR013","NC_006576.1")
Synechococcus elongatus PCC 7942 = FACHB-805, complete sequence	P		Synechococcus elongatus PCC 7942 = FACHB-805	536	536	1	9e-173	74.85	2695903	=HYPERLINK("https://www.ncbi.nlm.nih.gov/nucleotide/NC_007604.1?report=genbank&log$=nucltop&blast_rank=93&RID=E5SYZANR013","NC_007604.1")
Synechococcus elongatus UTEX 3055 chromosome, complete genome	P		Synechococcus elongatus UTEX 3055	535	535	1	4e-172	74.56	2767524	=HYPERLINK("https://www.ncbi.nlm.nih.gov/nucleotide/NZ_CP033061.1?report=genbank&log$=nucltop&blast_rank=98&RID=E5SYZANR013","NZ_CP033061.1")
Synechococcus lividus PCC 6715 chromosome, complete genome			Synechococcus lividus PCC 6715	511	511	0.99	4e-164	72.43	2659739	=HYPERLINK("https://www.ncbi.nlm.nih.gov/nucleotide/NZ_CP018092.1?report=genbank&log$=nucltop&blast_rank=123&RID=E5SYZANR013","NZ_CP018092.1")
Synechococcus sp. A15-127 chromosome, complete genome			Synechococcus sp. A15-127	482	482	0.99	7e-154	66.47	2543463	=HYPERLINK("https://www.ncbi.nlm.nih.gov/nucleotide/NZ_CP047948.1?report=genbank&log$=nucltop&blast_rank=132&RID=E5SYZANR013","NZ_CP047948.1")
Synechococcus sp. A15-24 chromosome, complete genome			Synechococcus sp. A15-24	470	470	0.99	1e-149	65.88	2305373	=HYPERLINK("https://www.ncbi.nlm.nih.gov/nucleotide/NZ_CP047960.1?report=genbank&log$=nucltop&blast_rank=176&RID=E5SYZANR013","NZ_CP047960.1")
Synechococcus sp. A15-28 chromosome, complete genome			Synechococcus sp. A15-28	474	474	0.99	5e-151	64.71	2341586	=HYPERLINK("https://www.ncbi.nlm.nih.gov/nucleotide/NZ_CP047931.1?report=genbank&log$=nucltop&blast_rank=152&RID=E5SYZANR013","NZ_CP047931.1")
Synechococcus sp. A15-44 chromosome, complete genome			Synechococcus sp. A15-44	472	472	0.99	2e-150	66.47	2621965	=HYPERLINK("https://www.ncbi.nlm.nih.gov/nucleotide/NZ_CP047938.1?report=genbank&log$=nucltop&blast_rank=165&RID=E5SYZANR013","NZ_CP047938.1")
Synechococcus sp. A15-60 chromosome, complete genome			Synechococcus sp. A15-60	472	472	0.99	3e-150	65.00	2543402	=HYPERLINK("https://www.ncbi.nlm.nih.gov/nucleotide/NZ_CP047933.1?report=genbank&log$=nucltop&blast_rank=167&RID=E5SYZANR013","NZ_CP047933.1")
Synechococcus sp. A15-62 chromosome, complete genome			Synechococcus sp. A15-62	471	471	0.99	3e-150	66.18	2294140	=HYPERLINK("https://www.ncbi.nlm.nih.gov/nucleotide/NZ_CP047950.1?report=genbank&log$=nucltop&blast_rank=170&RID=E5SYZANR013","NZ_CP047950.1")
Synechococcus sp. A18-25c chromosome, complete genome			Synechococcus sp. A18-25c	472	472	0.99	2e-150	65.00	2511360	=HYPERLINK("https://www.ncbi.nlm.nih.gov/nucleotide/NZ_CP047957.1?report=genbank&log$=nucltop&blast_rank=161&RID=E5SYZANR013","NZ_CP047957.1")
Synechococcus sp. A18-40 chromosome, complete genome			Synechococcus sp. A18-40	469	469	0.99	2e-149	65.59	2401547	=HYPERLINK("https://www.ncbi.nlm.nih.gov/nucleotide/NZ_CP047956.1?report=genbank&log$=nucltop&blast_rank=180&RID=E5SYZANR013","NZ_CP047956.1")
Synechococcus sp. A18-46.1 chromosome, complete genome			Synechococcus sp. A18-46.1	468	468	0.99	5e-149	65.29	2471770	=HYPERLINK("https://www.ncbi.nlm.nih.gov/nucleotide/NZ_CP047955.1?report=genbank&log$=nucltop&blast_rank=186&RID=E5SYZANR013","NZ_CP047955.1")
Synechococcus sp. BIOS-U3-1 chromosome, complete genome			Synechococcus sp. BIOS-U3-1	469	469	0.99	2e-149	65.59	2710834	=HYPERLINK("https://www.ncbi.nlm.nih.gov/nucleotide/NZ_CP047936.1?report=genbank&log$=nucltop&blast_rank=177&RID=E5SYZANR013","NZ_CP047936.1")
Synechococcus sp. BMK-MC-1 chromosome, complete genome			Synechococcus sp. BMK-MC-1	468	468	0.99	5e-149	66.18	2601150	=HYPERLINK("https://www.ncbi.nlm.nih.gov/nucleotide/NZ_CP047939.1?report=genbank&log$=nucltop&blast_rank=188&RID=E5SYZANR013","NZ_CP047939.1")
Synechococcus sp. CB0101 chromosome, complete genome	P		Synechococcus sp. CB0101	479	479	0.99	9e-153	66.18	2789647	=HYPERLINK("https://www.ncbi.nlm.nih.gov/nucleotide/NZ_CP039373.1?report=genbank&log$=nucltop&blast_rank=140&RID=E5SYZANR013","NZ_CP039373.1")
Synechococcus sp. CBW1002 chromosome, complete genome	P		Synechococcus sp. CBW1002	476	476	0.99	1e-151	66.76	3854122	=HYPERLINK("https://www.ncbi.nlm.nih.gov/nucleotide/NZ_CP060398.1?report=genbank&log$=nucltop&blast_rank=147&RID=E5SYZANR013","NZ_CP060398.1")
Synechococcus sp. CBW1004 chromosome, complete genome	P		Synechococcus sp. CBW1004	481	481	0.95	2e-153	69.72	3672318	=HYPERLINK("https://www.ncbi.nlm.nih.gov/nucleotide/NZ_CP060397.1?report=genbank&log$=nucltop&blast_rank=137&RID=E5SYZANR013","NZ_CP060397.1")
Synechococcus sp. CBW1006 chromosome, complete genome	P		Synechococcus sp. CBW1006	479	479	0.99	6e-153	67.06	3860130	=HYPERLINK("https://www.ncbi.nlm.nih.gov/nucleotide/NZ_CP060396.1?report=genbank&log$=nucltop&blast_rank=139&RID=E5SYZANR013","NZ_CP060396.1")
Synechococcus sp. CBW1107 chromosome, complete genome	P		Synechococcus sp. CBW1107	481	481	0.99	2e-153	68.73	3202093	=HYPERLINK("https://www.ncbi.nlm.nih.gov/nucleotide/NZ_CP064908.1?report=genbank&log$=nucltop&blast_rank=136&RID=E5SYZANR013","NZ_CP064908.1")
Synechococcus sp. CBW1108 chromosome, complete genome	P		Synechococcus sp. CBW1108	472	472	0.99	2e-150	65.88	3226220	=HYPERLINK("https://www.ncbi.nlm.nih.gov/nucleotide/NZ_CP060395.1?report=genbank&log$=nucltop&blast_rank=159&RID=E5SYZANR013","NZ_CP060395.1")
Synechococcus sp. CC9311, complete sequence			Synechococcus sp. CC9311	469	469	0.99	3e-149	66.47	2606748	=HYPERLINK("https://www.ncbi.nlm.nih.gov/nucleotide/NC_008319.1?report=genbank&log$=nucltop&blast_rank=185&RID=E5SYZANR013","NC_008319.1")
Synechococcus sp. CC9605, complete sequence			Synechococcus sp. CC9605	469	469	0.99	2e-149	65.88	2510659	=HYPERLINK("https://www.ncbi.nlm.nih.gov/nucleotide/NC_007516.1?report=genbank&log$=nucltop&blast_rank=178&RID=E5SYZANR013","NC_007516.1")
Synechococcus sp. CC9902, complete sequence			Synechococcus sp. CC9902	478	478	0.99	2e-152	66.37	2234828	=HYPERLINK("https://www.ncbi.nlm.nih.gov/nucleotide/NC_007513.1?report=genbank&log$=nucltop&blast_rank=144&RID=E5SYZANR013","NC_007513.1")
Synechococcus sp. JA-2-3B'a(2-13), complete sequence		DK	Synechococcus sp. JA-2-3B'a(2-13)	436	436	0.97	6e-138	65.36	3046682	=HYPERLINK("https://www.ncbi.nlm.nih.gov/nucleotide/NC_007776.1?report=genbank&log$=nucltop&blast_rank=202&RID=E5SYZANR013","NC_007776.1")
Synechococcus sp. JA-3-3Ab, complete sequence		DK	Synechococcus sp. JA-3-3Ab	435	435	1	2e-137	63.16	2932766	=HYPERLINK("https://www.ncbi.nlm.nih.gov/nucleotide/NC_007775.1?report=genbank&log$=nucltop&blast_rank=203&RID=E5SYZANR013","NC_007775.1")
Synechococcus sp. KORDI-100 strain KORDI 100 chromosome, complete genome			Synechococcus sp. KORDI-100	466	466	0.99	4e-148	65.78	2789000	=HYPERLINK("https://www.ncbi.nlm.nih.gov/nucleotide/NZ_CP006269.1?report=genbank&log$=nucltop&blast_rank=194&RID=E5SYZANR013","NZ_CP006269.1")
Synechococcus sp. KORDI-49 strain KORDI 49 chromosome, complete genome			Synechococcus sp. KORDI-49	482	482	0.99	7e-154	66.18	2585813	=HYPERLINK("https://www.ncbi.nlm.nih.gov/nucleotide/NZ_CP006270.1?report=genbank&log$=nucltop&blast_rank=133&RID=E5SYZANR013","NZ_CP006270.1")
Synechococcus sp. KORDI-52 strain KORDI 52 chromosome, complete genome			Synechococcus sp. KORDI-52	471	471	0.99	5e-150	66.18	2572069	=HYPERLINK("https://www.ncbi.nlm.nih.gov/nucleotide/NZ_CP006271.1?report=genbank&log$=nucltop&blast_rank=172&RID=E5SYZANR013","NZ_CP006271.1")
Synechococcus sp. LTW-R chromosome, complete genome			Synechococcus sp. LTW-R	478	478	0.99	1e-152	65.59	2415533	=HYPERLINK("https://www.ncbi.nlm.nih.gov/nucleotide/NZ_CP059060.1?report=genbank&log$=nucltop&blast_rank=143&RID=E5SYZANR013","NZ_CP059060.1")
Synechococcus sp. M16.1 chromosome, complete genome			Synechococcus sp. M16.1	474	474	0.99	5e-151	66.76	2112236	=HYPERLINK("https://www.ncbi.nlm.nih.gov/nucleotide/NZ_CP047954.1?report=genbank&log$=nucltop&blast_rank=153&RID=E5SYZANR013","NZ_CP047954.1")
Synechococcus sp. MEDNS5 chromosome, complete genome			Synechococcus sp. MEDNS5	473	473	0.99	9e-151	67.35	2435869	=HYPERLINK("https://www.ncbi.nlm.nih.gov/nucleotide/NZ_CP047952.1?report=genbank&log$=nucltop&blast_rank=156&RID=E5SYZANR013","NZ_CP047952.1")
Synechococcus sp. Minos11 chromosome, complete genome			Synechococcus sp. Minos11	457	457	0.95	5e-145	69.63	2284343	=HYPERLINK("https://www.ncbi.nlm.nih.gov/nucleotide/NZ_CP047953.1?report=genbank&log$=nucltop&blast_rank=198&RID=E5SYZANR013","NZ_CP047953.1")
Synechococcus sp. MIT S9220 chromosome, complete genome			Synechococcus sp. MIT S9220	469	469	0.99	3e-149	65.59	2424175	=HYPERLINK("https://www.ncbi.nlm.nih.gov/nucleotide/NZ_CP047958.1?report=genbank&log$=nucltop&blast_rank=184&RID=E5SYZANR013","NZ_CP047958.1")
Synechococcus sp. MVIR-18-1 chromosome, complete genome			Synechococcus sp. MVIR-18-1	466	466	0.99	3e-148	66.18	2451974	=HYPERLINK("https://www.ncbi.nlm.nih.gov/nucleotide/NZ_CP047942.1?report=genbank&log$=nucltop&blast_rank=191&RID=E5SYZANR013","NZ_CP047942.1")
Synechococcus sp. NIES-970 DNA, complete genome	P		Synechococcus sp. NIES-970	555	555	1	2e-179	76.32	2836539	=HYPERLINK("https://www.ncbi.nlm.nih.gov/nucleotide/NZ_AP017959.1?report=genbank&log$=nucltop&blast_rank=18&RID=E5SYZANR013","NZ_AP017959.1")
Synechococcus sp. NOUM97013 chromosome, complete genome			Synechococcus sp. NOUM97013	472	472	0.99	2e-150	65.00	2552712	=HYPERLINK("https://www.ncbi.nlm.nih.gov/nucleotide/NZ_CP047941.1?report=genbank&log$=nucltop&blast_rank=163&RID=E5SYZANR013","NZ_CP047941.1")
Synechococcus sp. PCC 6312, complete sequence			Synechococcus sp. PCC 6312	526	526	0.99	4e-169	73.90	3697276	=HYPERLINK("https://www.ncbi.nlm.nih.gov/nucleotide/NC_019680.1?report=genbank&log$=nucltop&blast_rank=106&RID=E5SYZANR013","NC_019680.1")
Synechococcus sp. PCC 7002, complete sequence	P		Synechococcus sp. PCC 7002	557	557	1	6e-180	76.32	3008047	=HYPERLINK("https://www.ncbi.nlm.nih.gov/nucleotide/NC_010475.1?report=genbank&log$=nucltop&blast_rank=15&RID=E5SYZANR013","NC_010475.1")
Synechococcus sp. PCC 7003 chromosome, complete genome	P		Synechococcus sp. PCC 7003	554	554	1	5e-179	75.44	3057091	=HYPERLINK("https://www.ncbi.nlm.nih.gov/nucleotide/NZ_CP016474.1?report=genbank&log$=nucltop&blast_rank=24&RID=E5SYZANR013","NZ_CP016474.1")
Synechococcus sp. PCC 7117 chromosome, complete genome	P		Synechococcus sp. PCC 7117	557	557	1	4e-180	76.32	3087720	=HYPERLINK("https://www.ncbi.nlm.nih.gov/nucleotide/NZ_CP016477.1?report=genbank&log$=nucltop&blast_rank=14&RID=E5SYZANR013","NZ_CP016477.1")
Synechococcus sp. PCC 73109 chromosome, complete genome	P		Synechococcus sp. PCC 73109	558	558	1	2e-180	76.61	3025472	=HYPERLINK("https://www.ncbi.nlm.nih.gov/nucleotide/NZ_CP013998.1?report=genbank&log$=nucltop&blast_rank=13&RID=E5SYZANR013","NZ_CP013998.1")
Synechococcus sp. PCC 7502, complete sequence			Synechococcus sp. PCC 7502	481	481	0.99	1e-153	67.16	3510253	=HYPERLINK("https://www.ncbi.nlm.nih.gov/nucleotide/NC_019702.1?report=genbank&log$=nucltop&blast_rank=135&RID=E5SYZANR013","NC_019702.1")
Synechococcus sp. PCC 8807 chromosome, complete genome	P		Synechococcus sp. PCC 8807	555	555	1	3e-179	75.73	3059495	=HYPERLINK("https://www.ncbi.nlm.nih.gov/nucleotide/NZ_CP016483.1?report=genbank&log$=nucltop&blast_rank=21&RID=E5SYZANR013","NZ_CP016483.1")
Synechococcus sp. PROS-7-1 chromosome, complete genome			Synechococcus sp. PROS-7-1	472	472	0.99	3e-150	67.06	2565218	=HYPERLINK("https://www.ncbi.nlm.nih.gov/nucleotide/NZ_CP047945.1?report=genbank&log$=nucltop&blast_rank=166&RID=E5SYZANR013","NZ_CP047945.1")
Synechococcus sp. PROS-9-1 chromosome, complete genome			Synechococcus sp. PROS-9-1	467	604	0.99	2e-148	66.47	2273940	=HYPERLINK("https://www.ncbi.nlm.nih.gov/nucleotide/NZ_CP047961.1?report=genbank&log$=nucltop&blast_rank=190&RID=E5SYZANR013","NZ_CP047961.1")
Synechococcus sp. PROS-U-1 chromosome, complete genome			Synechococcus sp. PROS-U-1	471	471	0.99	6e-150	66.18	2576003	=HYPERLINK("https://www.ncbi.nlm.nih.gov/nucleotide/NZ_CP047951.1?report=genbank&log$=nucltop&blast_rank=173&RID=E5SYZANR013","NZ_CP047951.1")
Synechococcus sp. RCC307 genomic DNA sequence			Synechococcus sp. RCC307	457	457	0.95	5e-145	69.63	2224914	=HYPERLINK("https://www.ncbi.nlm.nih.gov/nucleotide/NC_009482.1?report=genbank&log$=nucltop&blast_rank=197&RID=E5SYZANR013","NC_009482.1")
Synechococcus sp. ROS8604 chromosome, complete genome			Synechococcus sp. ROS8604	472	472	0.99	3e-150	67.06	2876904	=HYPERLINK("https://www.ncbi.nlm.nih.gov/nucleotide/NZ_CP047946.1?report=genbank&log$=nucltop&blast_rank=168&RID=E5SYZANR013","NZ_CP047946.1")
Synechococcus sp. RS9902 chromosome, complete genome			Synechococcus sp. RS9902	473	473	0.99	1e-150	66.47	2481217	=HYPERLINK("https://www.ncbi.nlm.nih.gov/nucleotide/NZ_CP047949.1?report=genbank&log$=nucltop&blast_rank=157&RID=E5SYZANR013","NZ_CP047949.1")
Synechococcus sp. RS9907 chromosome, complete genome			Synechococcus sp. RS9907	473	473	0.99	1e-150	66.47	2581635	=HYPERLINK("https://www.ncbi.nlm.nih.gov/nucleotide/NZ_CP047944.1?report=genbank&log$=nucltop&blast_rank=158&RID=E5SYZANR013","NZ_CP047944.1")
Synechococcus sp. RS9909 chromosome, complete genome			Synechococcus sp. RS9909	465	465	0.99	6e-148	64.12	2603169	=HYPERLINK("https://www.ncbi.nlm.nih.gov/nucleotide/NZ_CP047943.1?report=genbank&log$=nucltop&blast_rank=195&RID=E5SYZANR013","NZ_CP047943.1")
Synechococcus sp. RSCCF101 chromosome, complete genome	P		Synechococcus sp. RSCCF101	456	456	0.96	6e-145	67.98	2984853	=HYPERLINK("https://www.ncbi.nlm.nih.gov/nucleotide/NZ_CP035632.1?report=genbank&log$=nucltop&blast_rank=199&RID=E5SYZANR013","NZ_CP035632.1")
Synechococcus sp. SYN20 chromosome, complete genome			Synechococcus sp. SYN20	468	468	0.99	9e-149	66.18	2728628	=HYPERLINK("https://www.ncbi.nlm.nih.gov/nucleotide/NZ_CP047959.1?report=genbank&log$=nucltop&blast_rank=189&RID=E5SYZANR013","NZ_CP047959.1")
Synechococcus sp. SynAce01, complete genome	P		Synechococcus sp. SynAce01	471	471	0.95	7e-150	69.02	2750634	=HYPERLINK("https://www.ncbi.nlm.nih.gov/nucleotide/NZ_CP018091.1?report=genbank&log$=nucltop&blast_rank=174&RID=E5SYZANR013","NZ_CP018091.1")
Synechococcus sp. TAK9802 chromosome, complete genome			Synechococcus sp. TAK9802	475	475	0.99	2e-151	67.06	2190394	=HYPERLINK("https://www.ncbi.nlm.nih.gov/nucleotide/NZ_CP047937.1?report=genbank&log$=nucltop&blast_rank=149&RID=E5SYZANR013","NZ_CP047937.1")
Synechococcus sp. UTEX 2973 chromosome, complete genome	P		Synechococcus sp. UTEX 2973	536	536	1	9e-173	74.85	2690418	=HYPERLINK("https://www.ncbi.nlm.nih.gov/nucleotide/NZ_CP006471.1?report=genbank&log$=nucltop&blast_rank=92&RID=E5SYZANR013","NZ_CP006471.1")
Synechococcus sp. WH 8101 chromosome, complete genome	P		Synechococcus sp. WH 8101	466	466	0.99	3e-148	64.12	2623023	=HYPERLINK("https://www.ncbi.nlm.nih.gov/nucleotide/NZ_CP047932.1?report=genbank&log$=nucltop&blast_rank=192&RID=E5SYZANR013","NZ_CP047932.1")
Synechococcus sp. WH 8102, complete sequence	P		Synechococcus sp. WH 8102	469	469	0.99	2e-149	65.59	2434428	=HYPERLINK("https://www.ncbi.nlm.nih.gov/nucleotide/NC_005070.1?report=genbank&log$=nucltop&blast_rank=182&RID=E5SYZANR013","NC_005070.1")
Synechococcus sp. WH 8103 chromosome 1, complete sequence			Synechococcus sp. WH 8103	469	469	0.99	2e-149	65.59	2429688	=HYPERLINK("https://www.ncbi.nlm.nih.gov/nucleotide/NZ_LN847356.1?report=genbank&log$=nucltop&blast_rank=181&RID=E5SYZANR013","NZ_LN847356.1")
Synechococcus sp. WH 8109 chromosome, complete genome			Synechococcus sp. WH 8109	472	472	0.99	2e-150	66.47	2111515	=HYPERLINK("https://www.ncbi.nlm.nih.gov/nucleotide/NZ_CP006882.1?report=genbank&log$=nucltop&blast_rank=162&RID=E5SYZANR013","NZ_CP006882.1")
Synechococcus WH7803 complete genome sequence			Synechococcus sp. WH 7803	468	468	0.99	5e-149	66.18	2366980	=HYPERLINK("https://www.ncbi.nlm.nih.gov/nucleotide/NC_009481.1?report=genbank&log$=nucltop&blast_rank=187&RID=E5SYZANR013","NC_009481.1")
Synechocystis sp. IPPAS B-1465 chromosome, complete genome	P		Synechocystis sp. IPPAS B-1465	682	682	1	0.0	96.49	3574310	=HYPERLINK("https://www.ncbi.nlm.nih.gov/nucleotide/NZ_CP028094.1?report=genbank&log$=nucltop&blast_rank=3&RID=E5SYZANR013","NZ_CP028094.1")
Synechocystis sp. PCC 6714 chromosome, complete genome	P		Synechocystis sp. PCC 6714	666	666	1	0.0	93.57	3485441	=HYPERLINK("https://www.ncbi.nlm.nih.gov/nucleotide/NZ_CP007542.1?report=genbank&log$=nucltop&blast_rank=9&RID=E5SYZANR013","NZ_CP007542.1")
Synechocystis sp. PCC 6803 substr. GT-I, complete sequence	P		Synechocystis sp. PCC 6803 substr. GT-I	682	682	1	0.0	96.49	3570004	=HYPERLINK("https://www.ncbi.nlm.nih.gov/nucleotide/NC_017038.1?report=genbank&log$=nucltop&blast_rank=7&RID=E5SYZANR013","NC_017038.1")
Synechocystis sp. PCC 6803 substr. PCC-N, complete sequence	P		Synechocystis sp. PCC 6803 substr. PCC-N	682	682	1	0.0	96.49	3570103	=HYPERLINK("https://www.ncbi.nlm.nih.gov/nucleotide/NC_017052.1?report=genbank&log$=nucltop&blast_rank=5&RID=E5SYZANR013","NC_017052.1")
Synechocystis sp. PCC 6803 substr. PCC-P, complete sequence	P		Synechocystis sp. PCC 6803 substr. PCC-P	682	682	1	0.0	96.49	3570114	=HYPERLINK("https://www.ncbi.nlm.nih.gov/nucleotide/NC_017039.1?report=genbank&log$=nucltop&blast_rank=6&RID=E5SYZANR013","NC_017039.1")
Synechocystis sp. PCC 6803 substrain GT-G, complete genome	P		Synechocystis sp. PCC 6803	682	682	1	0.0	96.49	3569196	=HYPERLINK("https://www.ncbi.nlm.nih.gov/nucleotide/NZ_CP012832.1?report=genbank&log$=nucltop&blast_rank=2&RID=E5SYZANR013","NZ_CP012832.1")
Thermoleptolyngbya sp. PKUAC-SCTA183 chromosome, complete genome		DK	Thermoleptolyngbya sp. PKUAC-SCTA183	555	555	1	2e-179	77.19	5525100	=HYPERLINK("https://www.ncbi.nlm.nih.gov/nucleotide/NZ_CP053661.1?report=genbank&log$=nucltop&blast_rank=16&RID=E5SYZANR013","NZ_CP053661.1")
Thermoleptolyngbya sp. PKUAC-SCTB121 chromosome, complete genome		DK	Thermoleptolyngbya sp. PKUAC-SCTB121	555	555	1	3e-179	76.90	5490383	=HYPERLINK("https://www.ncbi.nlm.nih.gov/nucleotide/NZ_CP070366.1?report=genbank&log$=nucltop&blast_rank=23&RID=E5SYZANR013","NZ_CP070366.1")
Thermosynechococcus elongatus BP-1, complete sequence			Thermosynechococcus elongatus BP-1	525	525	1	1e-168	73.98	2593857	=HYPERLINK("https://www.ncbi.nlm.nih.gov/nucleotide/NC_004113.1?report=genbank&log$=nucltop&blast_rank=112&RID=E5SYZANR013","NC_004113.1")
Thermosynechococcus elongatus PKUAC-SCTE542 chromosome, complete genome			Thermosynechococcus elongatus PKUAC-SCTE542	504	504	1	9e-162	74.27	2650294	=HYPERLINK("https://www.ncbi.nlm.nih.gov/nucleotide/NZ_CP032152.1?report=genbank&log$=nucltop&blast_rank=126&RID=E5SYZANR013","NZ_CP032152.1")
Thermosynechococcus sp. CL-1 chromosome, complete genome			Thermosynechococcus sp. CL-1	510	510	1	9e-164	74.85	2647823	=HYPERLINK("https://www.ncbi.nlm.nih.gov/nucleotide/NZ_CP040671.1?report=genbank&log$=nucltop&blast_rank=125&RID=E5SYZANR013","NZ_CP040671.1")
Thermosynechococcus sp. TA-1 chromosome, complete genome			Thermosynechococcus sp. TA-1	511	511	1	6e-164	75.15	2658717	=HYPERLINK("https://www.ncbi.nlm.nih.gov/nucleotide/NZ_CP070960.1?report=genbank&log$=nucltop&blast_rank=124&RID=E5SYZANR013","NZ_CP070960.1")
Thermosynechococcus vulcanus NIES-2134 chromosome, complete genome			Thermosynechococcus vulcanus NIES-2134	525	525	1	8e-169	73.98	2571271	=HYPERLINK("https://www.ncbi.nlm.nih.gov/nucleotide/NZ_AP018202.1?report=genbank&log$=nucltop&blast_rank=110&RID=E5SYZANR013","NZ_AP018202.1")
Tolypothrix sp. PCC 7910 chromosome, complete genome	P	DK	Tolypothrix sp. PCC 7910	545	545	1	5e-176	75.22	8479123	=HYPERLINK("https://www.ncbi.nlm.nih.gov/nucleotide/NZ_CP050440.1?report=genbank&log$=nucltop&blast_rank=41&RID=E5SYZANR013","NZ_CP050440.1")
Trichodesmium erythraeum IMS101, complete sequence		DK	Trichodesmium erythraeum IMS101	537	537	1	3e-173	72.51	7750108	=HYPERLINK("https://www.ncbi.nlm.nih.gov/nucleotide/NC_008312.1?report=genbank&log$=nucltop&blast_rank=86&RID=E5SYZANR013","NC_008312.1")
Trichormus variabilis 0441 chromosome, complete genome	P	DK	Trichormus variabilis 0441	543	543	1	4e-175	74.27	6377767	=HYPERLINK("https://www.ncbi.nlm.nih.gov/nucleotide/NZ_CP047242.1?report=genbank&log$=nucltop&blast_rank=49&RID=E5SYZANR013","NZ_CP047242.1")
Trichormus variabilis ATCC 29413, complete sequence	P	DK	Trichormus variabilis ATCC 29413	543	543	1	4e-175	74.27	6365727	=HYPERLINK("https://www.ncbi.nlm.nih.gov/nucleotide/NC_007413.1?report=genbank&log$=nucltop&blast_rank=48&RID=E5SYZANR013","NC_007413.1")
Of 197 genomes with pdhA 111 harbir a PFOR
of 197 genomes with pdhA 67 contain nifDK
of these 67 with N2ase 56 are with PFOR
of the 130 remaining genomes 55 harbor a PFOR

## Sheet: NifD
Description	Scientific Name	Max Score	Total Score	Query Cover	E value	Per. ident	Acc. Len	Accession
Anabaena cylindrica PCC 7122, complete sequence	Anabaena cylindrica PCC 7122	540	1152	0.97	2e-171	81.37	6395836	=HYPERLINK("https://www.ncbi.nlm.nih.gov/nucleotide/NC_019771.1?report=genbank&log$=nucltop&blast_rank=67&RID=E899A6ZG016","NC_019771.1")
Anabaena sp. 90 chromosome chANA01, complete sequence	Anabaena sp. 90	809	1140	0.97	0.0	81.72	4329264	=HYPERLINK("https://www.ncbi.nlm.nih.gov/nucleotide/NC_019427.1?report=genbank&log$=nucltop&blast_rank=43&RID=E899A6ZG016","NC_019427.1")
Anabaena sp. WA102, complete sequence	Anabaena sp. WA102	813	1151	0.99	0.0	81.94	5705437	=HYPERLINK("https://www.ncbi.nlm.nih.gov/nucleotide/NZ_CP011456.1?report=genbank&log$=nucltop&blast_rank=37&RID=E899A6ZG016","NZ_CP011456.1")
Anabaena sp. YBS01 chromosome, complete genome	Anabaena sp. YBS01	943	3041	0.99	0.0	98.47	7013200	=HYPERLINK("https://www.ncbi.nlm.nih.gov/nucleotide/NZ_CP034058.1?report=genbank&log$=nucltop&blast_rank=6&RID=E899A6ZG016","NZ_CP034058.1")
Aphanizomenon flos-aquae DEX188 chromosome, complete genome	Aphanizomenon flos-aquae DEX188	814	1138	0.97	0.0	82.16	4538078	=HYPERLINK("https://www.ncbi.nlm.nih.gov/nucleotide/CP051188.1?report=genbank&log$=nucltop&blast_rank=35&RID=E899A6ZG016","CP051188.1")
Aphanizomenon flos-aquae KM1D3_PB chromosome, complete genome	Aphanizomenon flos-aquae KM1D3_PB	816	1150	0.97	0.0	81.66	6071322	=HYPERLINK("https://www.ncbi.nlm.nih.gov/nucleotide/CP051528.1?report=genbank&log$=nucltop&blast_rank=33&RID=E899A6ZG016","CP051528.1")
Calothrix sp. 336/3 chromosome, complete genome	Calothrix sp. 336/3	930	1185	0.99	0.0	89.30	6283267	=HYPERLINK("https://www.ncbi.nlm.nih.gov/nucleotide/NZ_CP011382.1?report=genbank&log$=nucltop&blast_rank=9&RID=E899A6ZG016","NZ_CP011382.1")
Calothrix sp. NIES-2098 DNA, complete genome	Calothrix sp. NIES-2098	888	2495	0.99	0.0	83.95	8656060	=HYPERLINK("https://www.ncbi.nlm.nih.gov/nucleotide/NZ_AP018172.1?report=genbank&log$=nucltop&blast_rank=14&RID=E899A6ZG016","NZ_AP018172.1")
Calothrix sp. NIES-3974 chromosome, complete genome	Calothrix sp. NIES-3974	882	1218	0.98	0.0	89.80	5985875	=HYPERLINK("https://www.ncbi.nlm.nih.gov/nucleotide/NZ_AP018254.1?report=genbank&log$=nucltop&blast_rank=17&RID=E899A6ZG016","NZ_AP018254.1")
Calothrix sp. NIES-4071 DNA, complete genome	Calothrix sp. NIES-4071	947	1345	0.99	0.0	90.12	11064963	=HYPERLINK("https://www.ncbi.nlm.nih.gov/nucleotide/NZ_AP018255.1?report=genbank&log$=nucltop&blast_rank=2&RID=E899A6ZG016","NZ_AP018255.1")
Calothrix sp. NIES-4101 DNA, complete genome	Calothrix sp. NIES-4101	447	1175	0.97	4e-139	87.39	7235916	=HYPERLINK("https://www.ncbi.nlm.nih.gov/nucleotide/AP018280.1?report=genbank&log$=nucltop&blast_rank=72&RID=E899A6ZG016","AP018280.1")
Calothrix sp. PCC 6303, complete sequence	Calothrix sp. PCC 6303	863	1182	0.97	0.0	88.82	6767834	=HYPERLINK("https://www.ncbi.nlm.nih.gov/nucleotide/NC_019751.1?report=genbank&log$=nucltop&blast_rank=20&RID=E899A6ZG016","NC_019751.1")
Calothrix sp. PCC 7507, complete sequence	Calothrix sp. PCC 7507	822	1151	0.97	0.0	83.11	7023215	=HYPERLINK("https://www.ncbi.nlm.nih.gov/nucleotide/NC_019682.1?report=genbank&log$=nucltop&blast_rank=28&RID=E899A6ZG016","NC_019682.1")
Candidatus Atelocyanobacterium thalassa isolate ALOHA, complete sequence	Candidatus Atelocyanobacterium thalassa isolate ALOHA	781	1019	0.96	0.0	74.32	1443806	=HYPERLINK("https://www.ncbi.nlm.nih.gov/nucleotide/NC_013771.1?report=genbank&log$=nucltop&blast_rank=58&RID=E899A6ZG016","NC_013771.1")
Chroococcidiopsis thermalis PCC 7203, complete sequence	Chroococcidiopsis thermalis PCC 7203	835	1087	0.98	0.0	79.60	6315792	=HYPERLINK("https://www.ncbi.nlm.nih.gov/nucleotide/NC_019695.1?report=genbank&log$=nucltop&blast_rank=22&RID=E899A6ZG016","NC_019695.1")
Crocosphaera subtropica ATCC 51142 chromosome circular, complete sequence	Crocosphaera subtropica ATCC 51142	794	1022	0.96	0.0	76.20	4934271	=HYPERLINK("https://www.ncbi.nlm.nih.gov/nucleotide/NC_010546.1?report=genbank&log$=nucltop&blast_rank=57&RID=E899A6ZG016","NC_010546.1")
Cyanobacterium endosymbiont of Epithemia turgida isolate EtSB Lake Yunoko chromosome	cyanobacterium endosymbiont of Epithemia turgida isolate EtSB Lake Yunoko	797	1039	0.96	0.0	76.41	2794318	=HYPERLINK("https://www.ncbi.nlm.nih.gov/nucleotide/NZ_AP012549.1?report=genbank&log$=nucltop&blast_rank=56&RID=E899A6ZG016","NZ_AP012549.1")
Cyanobacterium endosymbiont of Rhopalodia gibberula isolate cyanobacterium endosymbiont of Rhopalodia gibberula isolate RgSB Namiki Park chromosome, complete genome	cyanobacterium endosymbiont of Rhopalodia gibberula	798	1038	0.96	0.0	76.41	3020309	=HYPERLINK("https://www.ncbi.nlm.nih.gov/nucleotide/NZ_AP018341.1?report=genbank&log$=nucltop&blast_rank=55&RID=E899A6ZG016","NZ_AP018341.1")
Cyanothece sp. PCC 7425, complete sequence	Cyanothece sp. PCC 7425	836	1082	0.98	0.0	79.39	5374574	=HYPERLINK("https://www.ncbi.nlm.nih.gov/nucleotide/NC_011884.1?report=genbank&log$=nucltop&blast_rank=21&RID=E899A6ZG016","NC_011884.1")
Cylindrospermopsis curvispora GIHE-G1 chromosome, complete genome	Cylindrospermopsis curvispora GIHE-G1	882	1141	0.99	0.0	82.35	3910736	=HYPERLINK("https://www.ncbi.nlm.nih.gov/nucleotide/NZ_CP060822.1?report=genbank&log$=nucltop&blast_rank=16&RID=E899A6ZG016","NZ_CP060822.1")
Cylindrospermopsis raciborskii N8 chromosome, complete genome	Cylindrospermopsis raciborskii N8	880	1132	0.99	0.0	82.15	3857174	=HYPERLINK("https://www.ncbi.nlm.nih.gov/nucleotide/NZ_CP073250.1?report=genbank&log$=nucltop&blast_rank=19&RID=E899A6ZG016","NZ_CP073250.1")
Dolichospermum flos-aquae CCAP 1403/13F chromosome, complete genome	Dolichospermum flos-aquae CCAP 1403/13F	809	1149	0.99	0.0	81.72	5151752	=HYPERLINK("https://www.ncbi.nlm.nih.gov/nucleotide/NZ_CP051206.1?report=genbank&log$=nucltop&blast_rank=42&RID=E899A6ZG016","NZ_CP051206.1")
Dolichospermum sp. DET69 chromosome, complete genome	Dolichospermum sp. DET69	808	1143	0.99	0.0	81.72	5839262	=HYPERLINK("https://www.ncbi.nlm.nih.gov/nucleotide/CP070233.1?report=genbank&log$=nucltop&blast_rank=47&RID=E899A6ZG016","CP070233.1")
Dolichospermum sp. DL01 chromosome, complete genome	Dolichospermum sp. DL01	811	1148	0.99	0.0	81.94	4827232	=HYPERLINK("https://www.ncbi.nlm.nih.gov/nucleotide/CP050884.1?report=genbank&log$=nucltop&blast_rank=39&RID=E899A6ZG016","CP050884.1")
Dolichospermum sp. LBC05a chromosome, complete genome	Dolichospermum sp. LBC05a	809	1146	0.99	0.0	81.72	5178591	=HYPERLINK("https://www.ncbi.nlm.nih.gov/nucleotide/CP050882.1?report=genbank&log$=nucltop&blast_rank=44&RID=E899A6ZG016","CP050882.1")
Dolichospermum sp. UHCC 0315A chromosome, complete genome	Dolichospermum sp. UHCC 0315A	811	1141	0.97	0.0	81.94	5407479	=HYPERLINK("https://www.ncbi.nlm.nih.gov/nucleotide/NZ_CP043056.1?report=genbank&log$=nucltop&blast_rank=38&RID=E899A6ZG016","NZ_CP043056.1")
Dolichospermum sp. UKL201 chromosome, complete genome	Dolichospermum sp. UKL201	809	1141	0.97	0.0	81.72	5294355	=HYPERLINK("https://www.ncbi.nlm.nih.gov/nucleotide/CP050891.1?report=genbank&log$=nucltop&blast_rank=45&RID=E899A6ZG016","CP050891.1")
Euhalothece natronophila Z-M001 chromosome, complete genome	Euhalothece natronophila Z-M001	752	1002	0.95	0.0	70.33	3326959	=HYPERLINK("https://www.ncbi.nlm.nih.gov/nucleotide/NZ_CP042326.1?report=genbank&log$=nucltop&blast_rank=64&RID=E899A6ZG016","NZ_CP042326.1")
Fischerella sp. NIES-3754 chromosome, complete genome	Fischerella sp. NIES-3754	936	1192	0.97	0.0	89.51	5821603	=HYPERLINK("https://www.ncbi.nlm.nih.gov/nucleotide/NZ_AP017305.1?report=genbank&log$=nucltop&blast_rank=8&RID=E899A6ZG016","NZ_AP017305.1")
Gloeothece citriformis PCC 7424, complete sequence	Gloeothece citriformis PCC 7424	804	1044	0.96	0.0	76.92	5942652	=HYPERLINK("https://www.ncbi.nlm.nih.gov/nucleotide/NC_011729.1?report=genbank&log$=nucltop&blast_rank=52&RID=E899A6ZG016","NC_011729.1")
Gloeothece verrucosa PCC 7822, complete sequence	Gloeothece verrucosa PCC 7822	805	1058	0.98	0.0	76.58	6091620	=HYPERLINK("https://www.ncbi.nlm.nih.gov/nucleotide/NC_014501.1?report=genbank&log$=nucltop&blast_rank=51&RID=E899A6ZG016","NC_014501.1")
Halothece sp. PCC 7418, complete sequence	Halothece sp. PCC 7418	771	1023	0.96	0.0	71.88	4179170	=HYPERLINK("https://www.ncbi.nlm.nih.gov/nucleotide/NC_019779.1?report=genbank&log$=nucltop&blast_rank=63&RID=E899A6ZG016","NC_019779.1")
Leptolyngbya boryana dg5 chromosome	Leptolyngbya boryana dg5	827	1090	0.98	0.0	77.78	6176365	=HYPERLINK("https://www.ncbi.nlm.nih.gov/nucleotide/NZ_AP014642.1?report=genbank&log$=nucltop&blast_rank=26&RID=E899A6ZG016","NZ_AP014642.1")
Leptolyngbya boryana IAM M-101 chromosome	Leptolyngbya boryana IAM M-101	827	1090	0.98	0.0	77.78	6176364	=HYPERLINK("https://www.ncbi.nlm.nih.gov/nucleotide/NZ_AP014638.1?report=genbank&log$=nucltop&blast_rank=27&RID=E899A6ZG016","NZ_AP014638.1")
Leptolyngbya boryana NIES-2135 DNA, complete genome	Leptolyngbya boryana NIES-2135	827	1090	0.98	0.0	77.78	6255463	=HYPERLINK("https://www.ncbi.nlm.nih.gov/nucleotide/NZ_AP018203.1?report=genbank&log$=nucltop&blast_rank=25&RID=E899A6ZG016","NZ_AP018203.1")
Leptolyngbya sp. O-77 chromosome, complete genome	Leptolyngbya sp. O-77	778	1041	0.97	0.0	73.20	5480261	=HYPERLINK("https://www.ncbi.nlm.nih.gov/nucleotide/NZ_AP017367.1?report=genbank&log$=nucltop&blast_rank=61&RID=E899A6ZG016","NZ_AP017367.1")
Microcoleus sp. PCC 7113, complete sequence	Microcoleus sp. PCC 7113	835	1097	0.98	0.0	79.68	7470429	=HYPERLINK("https://www.ncbi.nlm.nih.gov/nucleotide/NC_019738.1?report=genbank&log$=nucltop&blast_rank=23&RID=E899A6ZG016","NC_019738.1")
Nodularia spumigena UHCC 0039 chromosome, complete genome	Nodularia spumigena UHCC 0039	810	1143	0.98	0.0	80.35	5294286	=HYPERLINK("https://www.ncbi.nlm.nih.gov/nucleotide/NZ_CP020114.1?report=genbank&log$=nucltop&blast_rank=40&RID=E899A6ZG016","NZ_CP020114.1")
'Nostoc azollae' 0708, complete sequence	'Nostoc azollae' 0708	887	1141	0.97	0.0	83.95	5354700	=HYPERLINK("https://www.ncbi.nlm.nih.gov/nucleotide/NC_014248.1?report=genbank&log$=nucltop&blast_rank=15&RID=E899A6ZG016","NC_014248.1")
Nostoc edaphicum CCNP1411 chromosome, complete genome	Nostoc edaphicum CCNP1411	813	1360	0.99	0.0	81.80	7733505	=HYPERLINK("https://www.ncbi.nlm.nih.gov/nucleotide/NZ_CP054698.1?report=genbank&log$=nucltop&blast_rank=36&RID=E899A6ZG016","NZ_CP054698.1")
Nostoc flagelliforme CCNUN1 chromosome, complete genome	Nostoc flagelliforme CCNUN1	540	1386	0.97	2e-171	79.55	8363872	=HYPERLINK("https://www.ncbi.nlm.nih.gov/nucleotide/NZ_CP024785.1?report=genbank&log$=nucltop&blast_rank=66&RID=E899A6ZG016","NZ_CP024785.1")
Nostoc punctiforme PCC 73102, complete sequence	Nostoc punctiforme PCC 73102	815	1367	0.97	0.0	81.80	8234322	=HYPERLINK("https://www.ncbi.nlm.nih.gov/nucleotide/NC_010628.1?report=genbank&log$=nucltop&blast_rank=34&RID=E899A6ZG016","NC_010628.1")
Nostoc sp. ATCC 53789 chromosome, complete genome	Nostoc sp. ATCC 53789	816	1377	0.98	0.0	81.80	7340101	=HYPERLINK("https://www.ncbi.nlm.nih.gov/nucleotide/NZ_CP046703.1?report=genbank&log$=nucltop&blast_rank=30&RID=E899A6ZG016","NZ_CP046703.1")
Nostoc sp. C052 chromosome, complete genome	Nostoc sp. C052	816	1375	0.97	0.0	82.24	7828336	=HYPERLINK("https://www.ncbi.nlm.nih.gov/nucleotide/NZ_CP040272.1?report=genbank&log$=nucltop&blast_rank=32&RID=E899A6ZG016","NZ_CP040272.1")
Nostoc sp. C057 chromosome, complete genome	Nostoc sp. C057	816	1363	0.97	0.0	81.80	7495445	=HYPERLINK("https://www.ncbi.nlm.nih.gov/nucleotide/NZ_CP040281.1?report=genbank&log$=nucltop&blast_rank=31&RID=E899A6ZG016","NZ_CP040281.1")
Nostoc sp. CENA543 chromosome, complete genome	Nostoc sp. CENA543	929	1263	0.97	0.0	96.30	6990729	=HYPERLINK("https://www.ncbi.nlm.nih.gov/nucleotide/NZ_CP023278.1?report=genbank&log$=nucltop&blast_rank=11&RID=E899A6ZG016","NZ_CP023278.1")
Nostoc sp. HK-01 DNA, complete genome	Nostoc sp. HK-01	986	1418	0.98	0.0	95.88	6494018	=HYPERLINK("https://www.ncbi.nlm.nih.gov/nucleotide/AP018318.1?report=genbank&log$=nucltop&blast_rank=1&RID=E899A6ZG016","AP018318.1")
Nostoc sp. 'Lobaria pulmonaria (5183) cyanobiont' strain 5183 chromosome, complete genome	Nostoc sp. 'Lobaria pulmonaria (5183) cyanobiont'	808	1358	0.97	0.0	81.58	7061466	=HYPERLINK("https://www.ncbi.nlm.nih.gov/nucleotide/NZ_CP026692.1?report=genbank&log$=nucltop&blast_rank=46&RID=E899A6ZG016","NZ_CP026692.1")
Nostoc sp. NIES-3756 chromosome, complete genome	Nostoc sp. NIES-3756	944	1283	0.97	0.0	98.69	6463965	=HYPERLINK("https://www.ncbi.nlm.nih.gov/nucleotide/NZ_AP017295.1?report=genbank&log$=nucltop&blast_rank=4&RID=E899A6ZG016","NZ_AP017295.1")
Nostoc sp. PCC 7107, complete sequence	Nostoc sp. PCC 7107	922	1264	0.98	0.0	96.26	6329823	=HYPERLINK("https://www.ncbi.nlm.nih.gov/nucleotide/NC_019676.1?report=genbank&log$=nucltop&blast_rank=13&RID=E899A6ZG016","NC_019676.1")
Nostoc sp. PCC 7120 = FACHB-418, complete sequence	Nostoc sp. PCC 7120 = FACHB-418	946	1286	0.97	0.0	100.00	6413771	=HYPERLINK("https://www.ncbi.nlm.nih.gov/nucleotide/NC_003272.1?report=genbank&log$=nucltop&blast_rank=3&RID=E899A6ZG016","NC_003272.1")
Nostoc sp. PCC 7524, complete sequence	Nostoc sp. PCC 7524	928	1264	0.97	0.0	96.30	6635030	=HYPERLINK("https://www.ncbi.nlm.nih.gov/nucleotide/NC_019684.1?report=genbank&log$=nucltop&blast_rank=12&RID=E899A6ZG016","NC_019684.1")
Nostoc sp. 'Peltigera membranacea cyanobiont' N6 chromosome, complete genome	Nostoc sp. 'Peltigera membranacea cyanobiont' N6	536	1359	0.99	3e-170	79.80	8214648	=HYPERLINK("https://www.ncbi.nlm.nih.gov/nucleotide/NZ_CP026681.1?report=genbank&log$=nucltop&blast_rank=71&RID=E899A6ZG016","NZ_CP026681.1")
Nostoc sp. TCL240-02 chromosome, complete genome	Nostoc sp. TCL240-02	880	2280	0.97	0.0	83.13	7887247	=HYPERLINK("https://www.ncbi.nlm.nih.gov/nucleotide/NZ_CP040094.1?report=genbank&log$=nucltop&blast_rank=18&RID=E899A6ZG016","NZ_CP040094.1")
Nostoc sp. TCL26-01 chromosome, complete genome	Nostoc sp. TCL26-01	929	1435	0.97	0.0	96.30	6765102	=HYPERLINK("https://www.ncbi.nlm.nih.gov/nucleotide/NZ_CP040297.1?report=genbank&log$=nucltop&blast_rank=10&RID=E899A6ZG016","NZ_CP040297.1")
Nostoc sp. UHCC 0702 chromosome, complete genome	Nostoc sp. UHCC 0702	540	1394	0.97	3e-171	80.13	8587404	=HYPERLINK("https://www.ncbi.nlm.nih.gov/nucleotide/NZ_CP071065.1?report=genbank&log$=nucltop&blast_rank=68&RID=E899A6ZG016","NZ_CP071065.1")
Nostoc sphaeroides CCNUC1 chromosome Gxm1, complete sequence	Nostoc sphaeroides CCNUC1	539	1164	0.98	3e-171	80.66	6481972	=HYPERLINK("https://www.ncbi.nlm.nih.gov/nucleotide/NZ_CP045226.1?report=genbank&log$=nucltop&blast_rank=69&RID=E899A6ZG016","NZ_CP045226.1")
Nostoc sphaeroides strain Kutzing En chromosome, complete genome	Nostoc sphaeroides	539	1165	0.98	3e-171	80.66	6531820	=HYPERLINK("https://www.ncbi.nlm.nih.gov/nucleotide/NZ_CP031941.1?report=genbank&log$=nucltop&blast_rank=70&RID=E899A6ZG016","NZ_CP031941.1")
Nostocales cyanobacterium HT-58-2, complete genome	Nostocales cyanobacterium HT-58-2	805	1572	0.96	0.0	82.63	7846907	=HYPERLINK("https://www.ncbi.nlm.nih.gov/nucleotide/NZ_CP019636.1?report=genbank&log$=nucltop&blast_rank=50&RID=E899A6ZG016","NZ_CP019636.1")
Pleurocapsa sp. PCC 7327, complete sequence	Pleurocapsa sp. PCC 7327	810	1717	0.97	0.0	79.29	4986817	=HYPERLINK("https://www.ncbi.nlm.nih.gov/nucleotide/NC_019689.1?report=genbank&log$=nucltop&blast_rank=41&RID=E899A6ZG016","NC_019689.1")
Pseudanabaena sp. ABRG5-3 plasmid ABRG53d, complete sequence	Pseudanabaena sp. ABRG5-3	827	1093	0.98	0.0	79.22	125503	=HYPERLINK("https://www.ncbi.nlm.nih.gov/nucleotide/NZ_AP017564.1?report=genbank&log$=nucltop&blast_rank=24&RID=E899A6ZG016","NZ_AP017564.1")
Rippkaea orientalis PCC 8801, complete sequence	Rippkaea orientalis PCC 8801	801	1043	0.96	0.0	76.72	4679413	=HYPERLINK("https://www.ncbi.nlm.nih.gov/nucleotide/NC_011726.1?report=genbank&log$=nucltop&blast_rank=54&RID=E899A6ZG016","NC_011726.1")
Rippkaea orientalis PCC 8802, complete sequence	Rippkaea orientalis PCC 8802	801	1047	0.98	0.0	76.72	4669813	=HYPERLINK("https://www.ncbi.nlm.nih.gov/nucleotide/NC_013161.1?report=genbank&log$=nucltop&blast_rank=53&RID=E899A6ZG016","NC_013161.1")
Rivularia sp. PCC 7116, complete sequence	Rivularia sp. PCC 7116	346	1160	1	4e-104	81.96	8698463	=HYPERLINK("https://www.ncbi.nlm.nih.gov/nucleotide/NC_019678.1?report=genbank&log$=nucltop&blast_rank=73&RID=E899A6ZG016","NC_019678.1")
Synechococcus sp. JA-2-3B'a(2-13), complete sequence	Synechococcus sp. JA-2-3B'a(2-13)	805	1060	0.97	0.0	76.04	3046682	=HYPERLINK("https://www.ncbi.nlm.nih.gov/nucleotide/NC_007776.1?report=genbank&log$=nucltop&blast_rank=48&RID=E899A6ZG016","NC_007776.1")
Synechococcus sp. JA-3-3Ab, complete sequence	Synechococcus sp. JA-3-3Ab	805	1064	0.98	0.0	75.56	2932766	=HYPERLINK("https://www.ncbi.nlm.nih.gov/nucleotide/NC_007775.1?report=genbank&log$=nucltop&blast_rank=49&RID=E899A6ZG016","NC_007775.1")
Thermoleptolyngbya sp. PKUAC-SCTA183 chromosome, complete genome	Thermoleptolyngbya sp. PKUAC-SCTA183	778	1026	0.96	0.0	73.85	5525100	=HYPERLINK("https://www.ncbi.nlm.nih.gov/nucleotide/NZ_CP053661.1?report=genbank&log$=nucltop&blast_rank=60&RID=E899A6ZG016","NZ_CP053661.1")
Thermoleptolyngbya sp. PKUAC-SCTB121 chromosome, complete genome	Thermoleptolyngbya sp. PKUAC-SCTB121	778	1026	0.96	0.0	73.85	5490383	=HYPERLINK("https://www.ncbi.nlm.nih.gov/nucleotide/NZ_CP070366.1?report=genbank&log$=nucltop&blast_rank=59&RID=E899A6ZG016","NZ_CP070366.1")
Tolypothrix sp. PCC 7910 chromosome, complete genome	Tolypothrix sp. PCC 7910	822	1384	0.97	0.0	83.11	8479123	=HYPERLINK("https://www.ncbi.nlm.nih.gov/nucleotide/NZ_CP050440.1?report=genbank&log$=nucltop&blast_rank=29&RID=E899A6ZG016","NZ_CP050440.1")
Trichodesmium erythraeum IMS101, complete sequence	Trichodesmium erythraeum IMS101	774	1033	0.96	0.0	72.92	7750108	=HYPERLINK("https://www.ncbi.nlm.nih.gov/nucleotide/NC_008312.1?report=genbank&log$=nucltop&blast_rank=62&RID=E899A6ZG016","NC_008312.1")
Trichormus variabilis 0441 chromosome, complete genome	Trichormus variabilis 0441	943	3041	0.99	0.0	98.47	6377767	=HYPERLINK("https://www.ncbi.nlm.nih.gov/nucleotide/NZ_CP047242.1?report=genbank&log$=nucltop&blast_rank=5&RID=E899A6ZG016","NZ_CP047242.1")
Trichormus variabilis ATCC 29413, complete sequence	Trichormus variabilis ATCC 29413	943	3041	0.99	0.0	98.47	6365727	=HYPERLINK("https://www.ncbi.nlm.nih.gov/nucleotide/NC_007413.1?report=genbank&log$=nucltop&blast_rank=7&RID=E899A6ZG016","NC_007413.1")

## Sheet: NifK
Description	Scientific Name	Max Score	Total Score	Query Cover	E value	Per. ident	Acc. Len	Accession
Anabaena cylindrica PCC 7122, complete sequence	Anabaena cylindrica PCC 7122	854	1021	1	0.0	76.76	6395836	=HYPERLINK("https://www.ncbi.nlm.nih.gov/nucleotide/NC_019771.1?report=genbank&log$=nucltop&blast_rank=29&RID=E89ARHUY01R","NC_019771.1")
Anabaena sp. 90 chromosome chANA01, complete sequence	Anabaena sp. 90	853	1031	1	0.0	76.37	4329264	=HYPERLINK("https://www.ncbi.nlm.nih.gov/nucleotide/NC_019427.1?report=genbank&log$=nucltop&blast_rank=31&RID=E89ARHUY01R","NC_019427.1")
Anabaena sp. WA102, complete sequence	Anabaena sp. WA102	850	1026	1	0.0	75.78	5705437	=HYPERLINK("https://www.ncbi.nlm.nih.gov/nucleotide/NZ_CP011456.1?report=genbank&log$=nucltop&blast_rank=35&RID=E89ARHUY01R","NZ_CP011456.1")
Anabaena sp. YBS01 chromosome, complete genome	Anabaena sp. YBS01	1060	2448	1	0.0	98.05	7013200	=HYPERLINK("https://www.ncbi.nlm.nih.gov/nucleotide/NZ_CP034058.1?report=genbank&log$=nucltop&blast_rank=3&RID=E89ARHUY01R","NZ_CP034058.1")
Aphanizomenon flos-aquae DEX188 chromosome, complete genome	Aphanizomenon flos-aquae DEX188	849	1026	1	0.0	75.98	4538078	=HYPERLINK("https://www.ncbi.nlm.nih.gov/nucleotide/CP051188.1?report=genbank&log$=nucltop&blast_rank=37&RID=E89ARHUY01R","CP051188.1")
Aphanizomenon flos-aquae KM1D3_PB chromosome, complete genome	Aphanizomenon flos-aquae KM1D3_PB	855	1026	1	0.0	76.17	6071322	=HYPERLINK("https://www.ncbi.nlm.nih.gov/nucleotide/CP051528.1?report=genbank&log$=nucltop&blast_rank=27&RID=E89ARHUY01R","CP051528.1")
Calothrix sp. 336/3 chromosome, complete genome	Calothrix sp. 336/3	949	1108	1	0.0	87.30	6283267	=HYPERLINK("https://www.ncbi.nlm.nih.gov/nucleotide/NZ_CP011382.1?report=genbank&log$=nucltop&blast_rank=11&RID=E89ARHUY01R","NZ_CP011382.1")
Calothrix sp. NIES-2098 DNA, complete genome	Calothrix sp. NIES-2098	793	2011	1	0.0	71.15	8656060	=HYPERLINK("https://www.ncbi.nlm.nih.gov/nucleotide/NZ_AP018172.1?report=genbank&log$=nucltop&blast_rank=50&RID=E89ARHUY01R","NZ_AP018172.1")
Calothrix sp. NIES-3974 chromosome, complete genome	Calothrix sp. NIES-3974	632	1102	1	0.0	80.94	5985875	=HYPERLINK("https://www.ncbi.nlm.nih.gov/nucleotide/NZ_AP018254.1?report=genbank&log$=nucltop&blast_rank=72&RID=E89ARHUY01R","NZ_AP018254.1")
Calothrix sp. NIES-4071 DNA, complete genome	Calothrix sp. NIES-4071	781	1279	1	0.0	83.95	11064963	=HYPERLINK("https://www.ncbi.nlm.nih.gov/nucleotide/NZ_AP018255.1?report=genbank&log$=nucltop&blast_rank=55&RID=E89ARHUY01R","NZ_AP018255.1")
Calothrix sp. NIES-4101 DNA, complete genome	Calothrix sp. NIES-4101	781	1130	1	0.0	84.42	7235916	=HYPERLINK("https://www.ncbi.nlm.nih.gov/nucleotide/AP018280.1?report=genbank&log$=nucltop&blast_rank=56&RID=E89ARHUY01R","AP018280.1")
Calothrix sp. PCC 6303, complete sequence	Calothrix sp. PCC 6303	930	1106	1	0.0	83.79	6767834	=HYPERLINK("https://www.ncbi.nlm.nih.gov/nucleotide/NC_019751.1?report=genbank&log$=nucltop&blast_rank=12&RID=E89ARHUY01R","NC_019751.1")
Calothrix sp. PCC 7507, complete sequence	Calothrix sp. PCC 7507	870	1048	1	0.0	77.93	7023215	=HYPERLINK("https://www.ncbi.nlm.nih.gov/nucleotide/NC_019682.1?report=genbank&log$=nucltop&blast_rank=14&RID=E89ARHUY01R","NC_019682.1")
Candidatus Atelocyanobacterium thalassa isolate ALOHA, complete sequence	Candidatus Atelocyanobacterium thalassa isolate ALOHA	768	926	1	0.0	68.75	1443806	=HYPERLINK("https://www.ncbi.nlm.nih.gov/nucleotide/NC_013771.1?report=genbank&log$=nucltop&blast_rank=59&RID=E89ARHUY01R","NC_013771.1")
Chroococcidiopsis thermalis PCC 7203, complete sequence	Chroococcidiopsis thermalis PCC 7203	816	1000	0.99	0.0	73.28	6315792	=HYPERLINK("https://www.ncbi.nlm.nih.gov/nucleotide/NC_019695.1?report=genbank&log$=nucltop&blast_rank=42&RID=E89ARHUY01R","NC_019695.1")
Crocosphaera subtropica ATCC 51142 chromosome circular, complete sequence	Crocosphaera subtropica ATCC 51142	780	937	1	0.0	69.73	4934271	=HYPERLINK("https://www.ncbi.nlm.nih.gov/nucleotide/NC_010546.1?report=genbank&log$=nucltop&blast_rank=57&RID=E89ARHUY01R","NC_010546.1")
Cyanobacterium endosymbiont of Epithemia turgida isolate EtSB Lake Yunoko chromosome	cyanobacterium endosymbiont of Epithemia turgida isolate EtSB Lake Yunoko	758	913	1	0.0	67.77	2794318	=HYPERLINK("https://www.ncbi.nlm.nih.gov/nucleotide/NZ_AP012549.1?report=genbank&log$=nucltop&blast_rank=61&RID=E89ARHUY01R","NZ_AP012549.1")
Cyanobacterium endosymbiont of Rhopalodia gibberula isolate cyanobacterium endosymbiont of Rhopalodia gibberula isolate RgSB Namiki Park chromosome, complete genome	cyanobacterium endosymbiont of Rhopalodia gibberula	771	924	1	0.0	68.36	3020309	=HYPERLINK("https://www.ncbi.nlm.nih.gov/nucleotide/NZ_AP018341.1?report=genbank&log$=nucltop&blast_rank=58&RID=E89ARHUY01R","NZ_AP018341.1")
Cyanothece sp. PCC 7425, complete sequence	Cyanothece sp. PCC 7425	786	957	1	0.0	71.15	5374574	=HYPERLINK("https://www.ncbi.nlm.nih.gov/nucleotide/NC_011884.1?report=genbank&log$=nucltop&blast_rank=54&RID=E89ARHUY01R","NC_011884.1")
Cylindrospermopsis curvispora GIHE-G1 chromosome, complete genome	Cylindrospermopsis curvispora GIHE-G1	862	1037	1	0.0	76.56	3910736	=HYPERLINK("https://www.ncbi.nlm.nih.gov/nucleotide/NZ_CP060822.1?report=genbank&log$=nucltop&blast_rank=23&RID=E89ARHUY01R","NZ_CP060822.1")
Cylindrospermopsis raciborskii N8 chromosome, complete genome	Cylindrospermopsis raciborskii N8	861	1035	1	0.0	76.56	3857174	=HYPERLINK("https://www.ncbi.nlm.nih.gov/nucleotide/NZ_CP073250.1?report=genbank&log$=nucltop&blast_rank=25&RID=E89ARHUY01R","NZ_CP073250.1")
Dolichospermum flos-aquae CCAP 1403/13F chromosome, complete genome	Dolichospermum flos-aquae CCAP 1403/13F	853	1033	1	0.0	76.37	5151752	=HYPERLINK("https://www.ncbi.nlm.nih.gov/nucleotide/NZ_CP051206.1?report=genbank&log$=nucltop&blast_rank=32&RID=E89ARHUY01R","NZ_CP051206.1")
Dolichospermum sp. DET69 chromosome, complete genome	Dolichospermum sp. DET69	849	1024	1	0.0	76.17	5839262	=HYPERLINK("https://www.ncbi.nlm.nih.gov/nucleotide/CP070233.1?report=genbank&log$=nucltop&blast_rank=36&RID=E89ARHUY01R","CP070233.1")
Dolichospermum sp. DL01 chromosome, complete genome	Dolichospermum sp. DL01	852	1028	1	0.0	76.17	4827232	=HYPERLINK("https://www.ncbi.nlm.nih.gov/nucleotide/CP050884.1?report=genbank&log$=nucltop&blast_rank=34&RID=E89ARHUY01R","CP050884.1")
Dolichospermum sp. LBC05a chromosome, complete genome	Dolichospermum sp. LBC05a	855	1033	1	0.0	76.56	5178591	=HYPERLINK("https://www.ncbi.nlm.nih.gov/nucleotide/CP050882.1?report=genbank&log$=nucltop&blast_rank=28&RID=E89ARHUY01R","CP050882.1")
Dolichospermum sp. UHCC 0315A chromosome, complete genome	Dolichospermum sp. UHCC 0315A	853	1033	1	0.0	76.37	5407479	=HYPERLINK("https://www.ncbi.nlm.nih.gov/nucleotide/NZ_CP043056.1?report=genbank&log$=nucltop&blast_rank=33&RID=E89ARHUY01R","NZ_CP043056.1")
Dolichospermum sp. UKL201 chromosome, complete genome	Dolichospermum sp. UKL201	846	1022	1	0.0	75.78	5294355	=HYPERLINK("https://www.ncbi.nlm.nih.gov/nucleotide/CP050891.1?report=genbank&log$=nucltop&blast_rank=39&RID=E89ARHUY01R","CP050891.1")
Euhalothece natronophila Z-M001 chromosome, complete genome	Euhalothece natronophila Z-M001	749	884	1	0.0	66.60	3326959	=HYPERLINK("https://www.ncbi.nlm.nih.gov/nucleotide/NZ_CP042326.1?report=genbank&log$=nucltop&blast_rank=64&RID=E89ARHUY01R","NZ_CP042326.1")
Fischerella sp. NIES-3754 chromosome, complete genome	Fischerella sp. NIES-3754	960	1119	1	0.0	86.91	5821603	=HYPERLINK("https://www.ncbi.nlm.nih.gov/nucleotide/NZ_AP017305.1?report=genbank&log$=nucltop&blast_rank=10&RID=E89ARHUY01R","NZ_AP017305.1")
Gloeothece citriformis PCC 7424, complete sequence	Gloeothece citriformis PCC 7424	808	962	1	0.0	71.29	5942652	=HYPERLINK("https://www.ncbi.nlm.nih.gov/nucleotide/NC_011729.1?report=genbank&log$=nucltop&blast_rank=43&RID=E89ARHUY01R","NC_011729.1")
Gloeothece verrucosa PCC 7822, complete sequence	Gloeothece verrucosa PCC 7822	797	958	1	0.0	71.48	6091620	=HYPERLINK("https://www.ncbi.nlm.nih.gov/nucleotide/NC_014501.1?report=genbank&log$=nucltop&blast_rank=48&RID=E89ARHUY01R","NC_014501.1")
Halothece sp. PCC 7418, complete sequence	Halothece sp. PCC 7418	731	897	1	0.0	65.23	4179170	=HYPERLINK("https://www.ncbi.nlm.nih.gov/nucleotide/NC_019779.1?report=genbank&log$=nucltop&blast_rank=68&RID=E89ARHUY01R","NC_019779.1")
Leptolyngbya boryana dg5 chromosome	Leptolyngbya boryana dg5	803	991	0.99	0.0	72.50	6176365	=HYPERLINK("https://www.ncbi.nlm.nih.gov/nucleotide/NZ_AP014642.1?report=genbank&log$=nucltop&blast_rank=46&RID=E89ARHUY01R","NZ_AP014642.1")
Leptolyngbya boryana IAM M-101 chromosome	Leptolyngbya boryana IAM M-101	803	991	0.99	0.0	72.50	6176364	=HYPERLINK("https://www.ncbi.nlm.nih.gov/nucleotide/NZ_AP014638.1?report=genbank&log$=nucltop&blast_rank=47&RID=E89ARHUY01R","NZ_AP014638.1")
Leptolyngbya boryana NIES-2135 DNA, complete genome	Leptolyngbya boryana NIES-2135	803	991	0.99	0.0	72.50	6255463	=HYPERLINK("https://www.ncbi.nlm.nih.gov/nucleotide/NZ_AP018203.1?report=genbank&log$=nucltop&blast_rank=45&RID=E89ARHUY01R","NZ_AP018203.1")
Leptolyngbya sp. O-77 chromosome, complete genome	Leptolyngbya sp. O-77	756	912	0.99	0.0	68.57	5480261	=HYPERLINK("https://www.ncbi.nlm.nih.gov/nucleotide/NZ_AP017367.1?report=genbank&log$=nucltop&blast_rank=63&RID=E89ARHUY01R","NZ_AP017367.1")
Microcoleus sp. PCC 7113, complete sequence	Microcoleus sp. PCC 7113	805	981	0.99	0.0	72.30	7470429	=HYPERLINK("https://www.ncbi.nlm.nih.gov/nucleotide/NC_019738.1?report=genbank&log$=nucltop&blast_rank=44&RID=E89ARHUY01R","NC_019738.1")
Nodularia spumigena UHCC 0039 chromosome, complete genome	Nodularia spumigena UHCC 0039	845	1016	1	0.0	75.20	5294286	=HYPERLINK("https://www.ncbi.nlm.nih.gov/nucleotide/NZ_CP020114.1?report=genbank&log$=nucltop&blast_rank=41&RID=E89ARHUY01R","NZ_CP020114.1")
'Nostoc azollae' 0708, complete sequence	'Nostoc azollae' 0708	853	1016	1	0.0	76.76	5354700	=HYPERLINK("https://www.ncbi.nlm.nih.gov/nucleotide/NC_014248.1?report=genbank&log$=nucltop&blast_rank=30&RID=E89ARHUY01R","NC_014248.1")
Nostoc edaphicum CCNP1411 chromosome, complete genome	Nostoc edaphicum CCNP1411	865	1192	1	0.0	77.34	7733505	=HYPERLINK("https://www.ncbi.nlm.nih.gov/nucleotide/NZ_CP054698.1?report=genbank&log$=nucltop&blast_rank=18&RID=E89ARHUY01R","NZ_CP054698.1")
Nostoc flagelliforme CCNUN1 chromosome, complete genome	Nostoc flagelliforme CCNUN1	863	1035	1	0.0	77.15	8363872	=HYPERLINK("https://www.ncbi.nlm.nih.gov/nucleotide/NZ_CP024785.1?report=genbank&log$=nucltop&blast_rank=22&RID=E89ARHUY01R","NZ_CP024785.1")
Nostoc punctiforme PCC 73102, complete sequence	Nostoc punctiforme PCC 73102	868	1201	1	0.0	77.93	8234322	=HYPERLINK("https://www.ncbi.nlm.nih.gov/nucleotide/NC_010628.1?report=genbank&log$=nucltop&blast_rank=15&RID=E89ARHUY01R","NC_010628.1")
Nostoc sp. ATCC 53789 chromosome, complete genome	Nostoc sp. ATCC 53789	867	1201	1	0.0	77.73	7340101	=HYPERLINK("https://www.ncbi.nlm.nih.gov/nucleotide/NZ_CP046703.1?report=genbank&log$=nucltop&blast_rank=16&RID=E89ARHUY01R","NZ_CP046703.1")
Nostoc sp. C052 chromosome, complete genome	Nostoc sp. C052	865	1120	1	0.0	77.54	7828336	=HYPERLINK("https://www.ncbi.nlm.nih.gov/nucleotide/NZ_CP040272.1?report=genbank&log$=nucltop&blast_rank=19&RID=E89ARHUY01R","NZ_CP040272.1")
Nostoc sp. C052 plasmid pC052_A, complete sequence	Nostoc sp. C052	258	466	0.85	1e-73	35.59	541557	=HYPERLINK("https://www.ncbi.nlm.nih.gov/nucleotide/NZ_CP040273.1?report=genbank&log$=nucltop&blast_rank=74&RID=E89ARHUY01R","NZ_CP040273.1")
Nostoc sp. C057 chromosome, complete genome	Nostoc sp. C057	867	1198	1	0.0	77.73	7495445	=HYPERLINK("https://www.ncbi.nlm.nih.gov/nucleotide/NZ_CP040281.1?report=genbank&log$=nucltop&blast_rank=17&RID=E89ARHUY01R","NZ_CP040281.1")
Nostoc sp. C057 plasmid p057_H	Nostoc sp. C057	260	414	0.85	3e-74	35.81	324833	=HYPERLINK("https://www.ncbi.nlm.nih.gov/nucleotide/NZ_CP040289.1?report=genbank&log$=nucltop&blast_rank=73&RID=E89ARHUY01R","NZ_CP040289.1")
Nostoc sp. CENA543 chromosome, complete genome	Nostoc sp. CENA543	1051	1258	1	0.0	97.07	6990729	=HYPERLINK("https://www.ncbi.nlm.nih.gov/nucleotide/NZ_CP023278.1?report=genbank&log$=nucltop&blast_rank=5&RID=E89ARHUY01R","NZ_CP023278.1")
Nostoc sp. HK-01 DNA, complete genome	Nostoc sp. HK-01	1034	1354	1	0.0	95.31	6494018	=HYPERLINK("https://www.ncbi.nlm.nih.gov/nucleotide/AP018318.1?report=genbank&log$=nucltop&blast_rank=8&RID=E89ARHUY01R","AP018318.1")
Nostoc sp. 'Lobaria pulmonaria (5183) cyanobiont' strain 5183 chromosome, complete genome	Nostoc sp. 'Lobaria pulmonaria (5183) cyanobiont'	846	1179	1	0.0	75.20	7061466	=HYPERLINK("https://www.ncbi.nlm.nih.gov/nucleotide/NZ_CP026692.1?report=genbank&log$=nucltop&blast_rank=38&RID=E89ARHUY01R","NZ_CP026692.1")
Nostoc sp. NIES-3756 chromosome, complete genome	Nostoc sp. NIES-3756	1046	1258	1	0.0	96.09	6463965	=HYPERLINK("https://www.ncbi.nlm.nih.gov/nucleotide/NZ_AP017295.1?report=genbank&log$=nucltop&blast_rank=6&RID=E89ARHUY01R","NZ_AP017295.1")
Nostoc sp. PCC 7107, complete sequence	Nostoc sp. PCC 7107	1039	1259	1	0.0	95.51	6329823	=HYPERLINK("https://www.ncbi.nlm.nih.gov/nucleotide/NC_019676.1?report=genbank&log$=nucltop&blast_rank=7&RID=E89ARHUY01R","NC_019676.1")
Nostoc sp. PCC 7120 = FACHB-418, complete sequence	Nostoc sp. PCC 7120 = FACHB-418	1074	1240	1	0.0	100.00	6413771	=HYPERLINK("https://www.ncbi.nlm.nih.gov/nucleotide/NC_003272.1?report=genbank&log$=nucltop&blast_rank=1&RID=E89ARHUY01R","NC_003272.1")
Nostoc sp. PCC 7524, complete sequence	Nostoc sp. PCC 7524	724	1269	1	0.0	93.30	6635030	=HYPERLINK("https://www.ncbi.nlm.nih.gov/nucleotide/NC_019684.1?report=genbank&log$=nucltop&blast_rank=70&RID=E89ARHUY01R","NC_019684.1")
Nostoc sp. 'Peltigera membranacea cyanobiont' N6 chromosome, complete genome	Nostoc sp. 'Peltigera membranacea cyanobiont' N6	846	1227	1	0.0	75.98	8214648	=HYPERLINK("https://www.ncbi.nlm.nih.gov/nucleotide/NZ_CP026681.1?report=genbank&log$=nucltop&blast_rank=40&RID=E89ARHUY01R","NZ_CP026681.1")
Nostoc sp. TCL240-02 chromosome, complete genome	Nostoc sp. TCL240-02	862	1452	1	0.0	77.34	7887247	=HYPERLINK("https://www.ncbi.nlm.nih.gov/nucleotide/NZ_CP040094.1?report=genbank&log$=nucltop&blast_rank=24&RID=E89ARHUY01R","NZ_CP040094.1")
Nostoc sp. TCL26-01 chromosome, complete genome	Nostoc sp. TCL26-01	1027	1352	1	0.0	94.73	6765102	=HYPERLINK("https://www.ncbi.nlm.nih.gov/nucleotide/NZ_CP040297.1?report=genbank&log$=nucltop&blast_rank=9&RID=E89ARHUY01R","NZ_CP040297.1")
Nostoc sp. UHCC 0702 chromosome, complete genome	Nostoc sp. UHCC 0702	856	1021	1	0.0	76.17	8587404	=HYPERLINK("https://www.ncbi.nlm.nih.gov/nucleotide/NZ_CP071065.1?report=genbank&log$=nucltop&blast_rank=26&RID=E89ARHUY01R","NZ_CP071065.1")
Nostoc sphaeroides CCNUC1 chromosome Gxm1, complete sequence	Nostoc sphaeroides CCNUC1	865	1041	1	0.0	77.34	6481972	=HYPERLINK("https://www.ncbi.nlm.nih.gov/nucleotide/NZ_CP045226.1?report=genbank&log$=nucltop&blast_rank=20&RID=E89ARHUY01R","NZ_CP045226.1")
Nostoc sphaeroides strain Kutzing En chromosome, complete genome	Nostoc sphaeroides	865	1041	1	0.0	77.34	6531820	=HYPERLINK("https://www.ncbi.nlm.nih.gov/nucleotide/NZ_CP031941.1?report=genbank&log$=nucltop&blast_rank=21&RID=E89ARHUY01R","NZ_CP031941.1")
Nostocales cyanobacterium HT-58-2, complete genome	Nostocales cyanobacterium HT-58-2	874	1263	1	0.0	78.32	7846907	=HYPERLINK("https://www.ncbi.nlm.nih.gov/nucleotide/NZ_CP019636.1?report=genbank&log$=nucltop&blast_rank=13&RID=E89ARHUY01R","NZ_CP019636.1")
Pleurocapsa sp. PCC 7327, complete sequence	Pleurocapsa sp. PCC 7327	791	1502	1	0.0	70.70	4986817	=HYPERLINK("https://www.ncbi.nlm.nih.gov/nucleotide/NC_019689.1?report=genbank&log$=nucltop&blast_rank=51&RID=E89ARHUY01R","NC_019689.1")
Pseudanabaena sp. ABRG5-3 plasmid ABRG53d, complete sequence	Pseudanabaena sp. ABRG5-3	794	973	1	0.0	70.96	125503	=HYPERLINK("https://www.ncbi.nlm.nih.gov/nucleotide/NZ_AP017564.1?report=genbank&log$=nucltop&blast_rank=49&RID=E89ARHUY01R","NZ_AP017564.1")
Rippkaea orientalis PCC 8801, complete sequence	Rippkaea orientalis PCC 8801	786	946	1	0.0	70.31	4679413	=HYPERLINK("https://www.ncbi.nlm.nih.gov/nucleotide/NC_011726.1?report=genbank&log$=nucltop&blast_rank=53&RID=E89ARHUY01R","NC_011726.1")
Rippkaea orientalis PCC 8802, complete sequence	Rippkaea orientalis PCC 8802	788	946	1	0.0	70.31	4669813	=HYPERLINK("https://www.ncbi.nlm.nih.gov/nucleotide/NC_013161.1?report=genbank&log$=nucltop&blast_rank=52&RID=E89ARHUY01R","NC_013161.1")
Rivularia sp. PCC 7116, complete sequence	Rivularia sp. PCC 7116	679	991	1	0.0	72.79	8698463	=HYPERLINK("https://www.ncbi.nlm.nih.gov/nucleotide/NC_019678.1?report=genbank&log$=nucltop&blast_rank=71&RID=E89ARHUY01R","NC_019678.1")
Synechococcus sp. JA-2-3B'a(2-13), complete sequence	Synechococcus sp. JA-2-3B'a(2-13)	736	900	1	0.0	67.58	3046682	=HYPERLINK("https://www.ncbi.nlm.nih.gov/nucleotide/NC_007776.1?report=genbank&log$=nucltop&blast_rank=66&RID=E89ARHUY01R","NC_007776.1")
Synechococcus sp. JA-3-3Ab, complete sequence	Synechococcus sp. JA-3-3Ab	735	900	1	0.0	67.38	2932766	=HYPERLINK("https://www.ncbi.nlm.nih.gov/nucleotide/NC_007775.1?report=genbank&log$=nucltop&blast_rank=67&RID=E89ARHUY01R","NC_007775.1")
Thermoleptolyngbya sp. PKUAC-SCTA183 chromosome, complete genome	Thermoleptolyngbya sp. PKUAC-SCTA183	756	918	0.99	0.0	68.76	5525100	=HYPERLINK("https://www.ncbi.nlm.nih.gov/nucleotide/NZ_CP053661.1?report=genbank&log$=nucltop&blast_rank=62&RID=E89ARHUY01R","NZ_CP053661.1")
Thermoleptolyngbya sp. PKUAC-SCTB121 chromosome, complete genome	Thermoleptolyngbya sp. PKUAC-SCTB121	759	920	0.99	0.0	68.96	5490383	=HYPERLINK("https://www.ncbi.nlm.nih.gov/nucleotide/NZ_CP070366.1?report=genbank&log$=nucltop&blast_rank=60&RID=E89ARHUY01R","NZ_CP070366.1")
Tolypothrix sp. PCC 7910 chromosome, complete genome	Tolypothrix sp. PCC 7910	724	1043	1	0.0	78.14	8479123	=HYPERLINK("https://www.ncbi.nlm.nih.gov/nucleotide/NZ_CP050440.1?report=genbank&log$=nucltop&blast_rank=69&RID=E89ARHUY01R","NZ_CP050440.1")
Trichodesmium erythraeum IMS101, complete sequence	Trichodesmium erythraeum IMS101	749	896	1	0.0	69.01	7750108	=HYPERLINK("https://www.ncbi.nlm.nih.gov/nucleotide/NC_008312.1?report=genbank&log$=nucltop&blast_rank=65&RID=E89ARHUY01R","NC_008312.1")
Trichormus variabilis 0441 chromosome, complete genome	Trichormus variabilis 0441	1060	2448	1	0.0	98.05	6377767	=HYPERLINK("https://www.ncbi.nlm.nih.gov/nucleotide/NZ_CP047242.1?report=genbank&log$=nucltop&blast_rank=2&RID=E89ARHUY01R","NZ_CP047242.1")
Trichormus variabilis ATCC 29413, complete sequence	Trichormus variabilis ATCC 29413	1060	2448	1	0.0	98.05	6365727	=HYPERLINK("https://www.ncbi.nlm.nih.gov/nucleotide/NC_007413.1?report=genbank&log$=nucltop&blast_rank=4&RID=E89ARHUY01R","NC_007413.1")

## Sheet: PFOR.NifJ
Description	Scientific Name	Max Score	Total Score	Query Cover	E value	Per. ident	Acc. Len	Accession
[Phormidium] sp. ETS-05 chromosome, complete genome	[Phormidium] sp. ETS-05	1846	1846	0.98	0.0	74.35	6286783	=HYPERLINK("https://www.ncbi.nlm.nih.gov/nucleotide/NZ_CP051168.1?report=genbank&log$=nucltop&blast_rank=25&RID=E5WJ9RDV013","NZ_CP051168.1")
Acaryochloris marina MBIC11017 plasmid pREB4, complete sequence	Acaryochloris marina MBIC11017	1690	1690	0.97	0.0	67.03	226680	=HYPERLINK("https://www.ncbi.nlm.nih.gov/nucleotide/NC_009929.1?report=genbank&log$=nucltop&blast_rank=90&RID=E5WJ9RDV013","NC_009929.1")
Anabaena cylindrica PCC 7122, complete sequence	Anabaena cylindrica PCC 7122	1746	2774	0.98	0.0	67.84	6395836	=HYPERLINK("https://www.ncbi.nlm.nih.gov/nucleotide/NC_019771.1?report=genbank&log$=nucltop&blast_rank=68&RID=E5WJ9RDV013","NC_019771.1")
Anabaena sp. 90 chromosome chANA01, complete sequence	Anabaena sp. 90	1757	3465	0.98	0.0	68.27	4329264	=HYPERLINK("https://www.ncbi.nlm.nih.gov/nucleotide/NC_019427.1?report=genbank&log$=nucltop&blast_rank=62&RID=E5WJ9RDV013","NC_019427.1")
Anabaena sp. WA102, complete sequence	Anabaena sp. WA102	1767	3478	0.98	0.0	69.22	5705437	=HYPERLINK("https://www.ncbi.nlm.nih.gov/nucleotide/NZ_CP011456.1?report=genbank&log$=nucltop&blast_rank=51&RID=E5WJ9RDV013","NZ_CP011456.1")
Anabaena sp. YBS01 chromosome, complete genome	Anabaena sp. YBS01	1763	3518	0.97	0.0	70.74	7013200	=HYPERLINK("https://www.ncbi.nlm.nih.gov/nucleotide/NZ_CP034058.1?report=genbank&log$=nucltop&blast_rank=57&RID=E5WJ9RDV013","NZ_CP034058.1")
Aphanizomenon flos-aquae DEX188 chromosome, complete genome	Aphanizomenon flos-aquae DEX188	1770	3476	0.98	0.0	68.81	4538078	=HYPERLINK("https://www.ncbi.nlm.nih.gov/nucleotide/CP051188.1?report=genbank&log$=nucltop&blast_rank=48&RID=E5WJ9RDV013","CP051188.1")
Aphanizomenon flos-aquae KM1D3_PB chromosome, complete genome	Aphanizomenon flos-aquae KM1D3_PB	1768	3475	0.98	0.0	69.37	6071322	=HYPERLINK("https://www.ncbi.nlm.nih.gov/nucleotide/CP051528.1?report=genbank&log$=nucltop&blast_rank=49&RID=E5WJ9RDV013","CP051528.1")
Arthrospira sp. PCC 9108 chromosome, complete genome	Arthrospira sp. PCC 9108	1808	1808	0.99	0.0	70.71	6763964	=HYPERLINK("https://www.ncbi.nlm.nih.gov/nucleotide/NZ_CP066886.1?report=genbank&log$=nucltop&blast_rank=30&RID=E5WJ9RDV013","NZ_CP066886.1")
Arthrospira sp. TJSD092 chromosome, complete genome	Arthrospira sp. TJSD092	1805	1805	0.99	0.0	70.78	6434389	=HYPERLINK("https://www.ncbi.nlm.nih.gov/nucleotide/NZ_CP028914.1?report=genbank&log$=nucltop&blast_rank=33&RID=E5WJ9RDV013","NZ_CP028914.1")
Calothrix sp. 336/3 chromosome, complete genome	Calothrix sp. 336/3	1731	1731	0.97	0.0	68.78	6283267	=HYPERLINK("https://www.ncbi.nlm.nih.gov/nucleotide/NZ_CP011382.1?report=genbank&log$=nucltop&blast_rank=77&RID=E5WJ9RDV013","NZ_CP011382.1")
Calothrix sp. NIES-2098 DNA, complete genome	Calothrix sp. NIES-2098	1787	3538	0.98	0.0	70.69	8656060	=HYPERLINK("https://www.ncbi.nlm.nih.gov/nucleotide/NZ_AP018172.1?report=genbank&log$=nucltop&blast_rank=42&RID=E5WJ9RDV013","NZ_AP018172.1")
Calothrix sp. NIES-3974 chromosome, complete genome	Calothrix sp. NIES-3974	1691	1691	0.97	0.0	68.02	5985875	=HYPERLINK("https://www.ncbi.nlm.nih.gov/nucleotide/NZ_AP018254.1?report=genbank&log$=nucltop&blast_rank=89&RID=E5WJ9RDV013","NZ_AP018254.1")
Calothrix sp. NIES-4071 DNA, complete genome	Calothrix sp. NIES-4071	1203	1711	0.98	0.0	68.27	11064963	=HYPERLINK("https://www.ncbi.nlm.nih.gov/nucleotide/NZ_AP018255.1?report=genbank&log$=nucltop&blast_rank=111&RID=E5WJ9RDV013","NZ_AP018255.1")
Calothrix sp. NIES-4101 DNA, complete genome	Calothrix sp. NIES-4101	1706	1706	0.97	0.0	67.77	7235916	=HYPERLINK("https://www.ncbi.nlm.nih.gov/nucleotide/AP018280.1?report=genbank&log$=nucltop&blast_rank=87&RID=E5WJ9RDV013","AP018280.1")
Calothrix sp. PCC 6303, complete sequence	Calothrix sp. PCC 6303	1696	1696	0.97	0.0	68.33	6767834	=HYPERLINK("https://www.ncbi.nlm.nih.gov/nucleotide/NC_019751.1?report=genbank&log$=nucltop&blast_rank=88&RID=E5WJ9RDV013","NC_019751.1")
Calothrix sp. PCC 7507, complete sequence	Calothrix sp. PCC 7507	1722	1722	0.97	0.0	69.54	7023215	=HYPERLINK("https://www.ncbi.nlm.nih.gov/nucleotide/NC_019682.1?report=genbank&log$=nucltop&blast_rank=81&RID=E5WJ9RDV013","NC_019682.1")
Chroococcidiopsis thermalis PCC 7203, complete sequence	Chroococcidiopsis thermalis PCC 7203	1771	1771	0.98	0.0	67.22	6315792	=HYPERLINK("https://www.ncbi.nlm.nih.gov/nucleotide/NC_019695.1?report=genbank&log$=nucltop&blast_rank=47&RID=E5WJ9RDV013","NC_019695.1")
Crocosphaera subtropica ATCC 51142 chromosome circular, complete sequence	Crocosphaera subtropica ATCC 51142	1941	1941	0.98	0.0	75.83	4934271	=HYPERLINK("https://www.ncbi.nlm.nih.gov/nucleotide/NC_010546.1?report=genbank&log$=nucltop&blast_rank=18&RID=E5WJ9RDV013","NC_010546.1")
Cyanobacterium endosymbiont of Rhopalodia gibberula isolate cyanobacterium endosymbiont of Rhopalodia gibberula isolate RgSB Namiki Park chromosome, complete genome	cyanobacterium endosymbiont of Rhopalodia gibberula	120	425	0.79	3e-75	35.59	3020309	=HYPERLINK("https://www.ncbi.nlm.nih.gov/nucleotide/NZ_AP018341.1?report=genbank&log$=nucltop&blast_rank=114&RID=E5WJ9RDV013","NZ_AP018341.1")
Cyanobium gracile PCC 6307, complete sequence	Cyanobium gracile PCC 6307	1507	1507	0.98	0.0	62.46	3342364	=HYPERLINK("https://www.ncbi.nlm.nih.gov/nucleotide/NC_019675.1?report=genbank&log$=nucltop&blast_rank=100&RID=E5WJ9RDV013","NC_019675.1")
Cyanobium sp. M30B3 chromosome, complete genome	Cyanobium sp. M30B3	1535	1535	0.97	0.0	61.70	3180296	=HYPERLINK("https://www.ncbi.nlm.nih.gov/nucleotide/NZ_CP073761.1?report=genbank&log$=nucltop&blast_rank=97&RID=E5WJ9RDV013","NZ_CP073761.1")
Cyanobium sp. NIES-981 chromosome I, complete sequence	Cyanobium sp. NIES-981	1487	1487	0.97	0.0	61.38	3021545	=HYPERLINK("https://www.ncbi.nlm.nih.gov/nucleotide/NZ_LT578417.1?report=genbank&log$=nucltop&blast_rank=103&RID=E5WJ9RDV013","NZ_LT578417.1")
Cyanobium sp. NS01 chromosome, complete genome	Cyanobium sp. NS01	1460	1460	0.97	0.0	60.43	2748087	=HYPERLINK("https://www.ncbi.nlm.nih.gov/nucleotide/NZ_CP047940.1?report=genbank&log$=nucltop&blast_rank=108&RID=E5WJ9RDV013","NZ_CP047940.1")
Cyanothece sp. PCC 7425, complete sequence	Cyanothece sp. PCC 7425	1778	1778	0.98	0.0	70.45	5374574	=HYPERLINK("https://www.ncbi.nlm.nih.gov/nucleotide/NC_011884.1?report=genbank&log$=nucltop&blast_rank=45&RID=E5WJ9RDV013","NC_011884.1")
Cylindrospermopsis curvispora GIHE-G1 chromosome, complete genome	Cylindrospermopsis curvispora GIHE-G1	1726	3405	0.98	0.0	69.13	3910736	=HYPERLINK("https://www.ncbi.nlm.nih.gov/nucleotide/NZ_CP060822.1?report=genbank&log$=nucltop&blast_rank=79&RID=E5WJ9RDV013","NZ_CP060822.1")
Cylindrospermopsis raciborskii N8 chromosome, complete genome	Cylindrospermopsis raciborskii N8	1764	3443	0.99	0.0	70.01	3857174	=HYPERLINK("https://www.ncbi.nlm.nih.gov/nucleotide/NZ_CP073250.1?report=genbank&log$=nucltop&blast_rank=55&RID=E5WJ9RDV013","NZ_CP073250.1")
Dolichospermum flos-aquae CCAP 1403/13F chromosome, complete genome	Dolichospermum flos-aquae CCAP 1403/13F	1755	3452	0.98	0.0	68.35	5151752	=HYPERLINK("https://www.ncbi.nlm.nih.gov/nucleotide/NZ_CP051206.1?report=genbank&log$=nucltop&blast_rank=63&RID=E5WJ9RDV013","NZ_CP051206.1")
Dolichospermum sp. DET69 chromosome, complete genome	Dolichospermum sp. DET69	1774	3475	0.98	0.0	69.17	5839262	=HYPERLINK("https://www.ncbi.nlm.nih.gov/nucleotide/CP070233.1?report=genbank&log$=nucltop&blast_rank=46&RID=E5WJ9RDV013","CP070233.1")
Dolichospermum sp. DL01 chromosome, complete genome	Dolichospermum sp. DL01	1764	3472	0.98	0.0	68.81	4827232	=HYPERLINK("https://www.ncbi.nlm.nih.gov/nucleotide/CP050884.1?report=genbank&log$=nucltop&blast_rank=54&RID=E5WJ9RDV013","CP050884.1")
Dolichospermum sp. LBC05a chromosome, complete genome	Dolichospermum sp. LBC05a	1758	3457	0.98	0.0	68.64	5178591	=HYPERLINK("https://www.ncbi.nlm.nih.gov/nucleotide/CP050882.1?report=genbank&log$=nucltop&blast_rank=61&RID=E5WJ9RDV013","CP050882.1")
Dolichospermum sp. UHCC 0315A chromosome, complete genome	Dolichospermum sp. UHCC 0315A	1759	3459	0.98	0.0	68.66	5407479	=HYPERLINK("https://www.ncbi.nlm.nih.gov/nucleotide/NZ_CP043056.1?report=genbank&log$=nucltop&blast_rank=60&RID=E5WJ9RDV013","NZ_CP043056.1")
Dolichospermum sp. UKL201 chromosome, complete genome	Dolichospermum sp. UKL201	1766	3467	0.98	0.0	69.06	5294355	=HYPERLINK("https://www.ncbi.nlm.nih.gov/nucleotide/CP050891.1?report=genbank&log$=nucltop&blast_rank=53&RID=E5WJ9RDV013","CP050891.1")
Fischerella sp. NIES-3754 chromosome, complete genome	Fischerella sp. NIES-3754	1750	3485	0.97	0.0	70.17	5821603	=HYPERLINK("https://www.ncbi.nlm.nih.gov/nucleotide/NZ_AP017305.1?report=genbank&log$=nucltop&blast_rank=64&RID=E5WJ9RDV013","NZ_AP017305.1")
Geitlerinema sp. PCC 7407, complete sequence	Geitlerinema sp. PCC 7407	1800	1800	0.99	0.0	71.18	4681111	=HYPERLINK("https://www.ncbi.nlm.nih.gov/nucleotide/NC_019703.1?report=genbank&log$=nucltop&blast_rank=37&RID=E5WJ9RDV013","NC_019703.1")
Gloeothece citriformis PCC 7424, complete sequence	Gloeothece citriformis PCC 7424	1878	1878	0.99	0.0	74.07	5942652	=HYPERLINK("https://www.ncbi.nlm.nih.gov/nucleotide/NC_011729.1?report=genbank&log$=nucltop&blast_rank=23&RID=E5WJ9RDV013","NC_011729.1")
Gloeothece verrucosa PCC 7822, complete sequence	Gloeothece verrucosa PCC 7822	1884	1884	0.99	0.0	74.05	6091620	=HYPERLINK("https://www.ncbi.nlm.nih.gov/nucleotide/NC_014501.1?report=genbank&log$=nucltop&blast_rank=22&RID=E5WJ9RDV013","NC_014501.1")
Halothece sp. PCC 7418, complete sequence	Halothece sp. PCC 7418	1791	1791	0.97	0.0	71.22	4179170	=HYPERLINK("https://www.ncbi.nlm.nih.gov/nucleotide/NC_019779.1?report=genbank&log$=nucltop&blast_rank=40&RID=E5WJ9RDV013","NC_019779.1")
Leptolyngbya sp. BL0902 chromosome, complete genome	Leptolyngbya sp. BL0902	1711	1711	0.98	0.0	69.16	4309234	=HYPERLINK("https://www.ncbi.nlm.nih.gov/nucleotide/NZ_CP046155.1?report=genbank&log$=nucltop&blast_rank=86&RID=E5WJ9RDV013","NZ_CP046155.1")
Limnospira fusiformis SAG 85.79 chromosome, complete genome	Limnospira fusiformis SAG 85.79	1805	1805	0.99	0.0	70.78	6423694	=HYPERLINK("https://www.ncbi.nlm.nih.gov/nucleotide/NZ_CP051185.1?report=genbank&log$=nucltop&blast_rank=32&RID=E5WJ9RDV013","NZ_CP051185.1")
Microcoleus sp. PCC 7113, complete sequence	Microcoleus sp. PCC 7113	1803	1803	0.98	0.0	71.29	7470429	=HYPERLINK("https://www.ncbi.nlm.nih.gov/nucleotide/NC_019738.1?report=genbank&log$=nucltop&blast_rank=34&RID=E5WJ9RDV013","NC_019738.1")
Microcystis aeruginosa FD4 chromosome, complete genome	Microcystis aeruginosa FD4	1947	1947	0.98	0.0	77.09	5449501	=HYPERLINK("https://www.ncbi.nlm.nih.gov/nucleotide/NZ_CP046973.1?report=genbank&log$=nucltop&blast_rank=13&RID=E5WJ9RDV013","NZ_CP046973.1")
Microcystis aeruginosa NIES-2481 chromosome, complete genome	Microcystis aeruginosa NIES-2481	1950	1950	0.98	0.0	77.39	4293006	=HYPERLINK("https://www.ncbi.nlm.nih.gov/nucleotide/NZ_CP012375.1?report=genbank&log$=nucltop&blast_rank=10&RID=E5WJ9RDV013","NZ_CP012375.1")
Microcystis aeruginosa NIES-2549 chromosome, complete genome	Microcystis aeruginosa NIES-2549	1949	1949	0.98	0.0	77.18	4294213	=HYPERLINK("https://www.ncbi.nlm.nih.gov/nucleotide/NZ_CP011304.1?report=genbank&log$=nucltop&blast_rank=11&RID=E5WJ9RDV013","NZ_CP011304.1")
Microcystis aeruginosa NIES-298 chromosome, complete genome	Microcystis aeruginosa NIES-298	1944	1944	0.98	0.0	76.97	4997809	=HYPERLINK("https://www.ncbi.nlm.nih.gov/nucleotide/NZ_CP046058.1?report=genbank&log$=nucltop&blast_rank=16&RID=E5WJ9RDV013","NZ_CP046058.1")
Microcystis aeruginosa NIES-843, complete sequence	Microcystis aeruginosa NIES-843	1939	1939	0.98	0.0	76.97	5842795	=HYPERLINK("https://www.ncbi.nlm.nih.gov/nucleotide/NC_010296.1?report=genbank&log$=nucltop&blast_rank=19&RID=E5WJ9RDV013","NC_010296.1")
Microcystis aeruginosa PCC 7806SL, complete genome	Microcystis aeruginosa PCC 7806SL	1946	1946	0.98	0.0	77.18	5139339	=HYPERLINK("https://www.ncbi.nlm.nih.gov/nucleotide/NZ_CP020771.1?report=genbank&log$=nucltop&blast_rank=14&RID=E5WJ9RDV013","NZ_CP020771.1")
Microcystis panniformis FACHB-1757 chromosome, complete genome	Microcystis panniformis FACHB-1757	1948	1948	0.98	0.0	77.09	5686839	=HYPERLINK("https://www.ncbi.nlm.nih.gov/nucleotide/NZ_CP011339.1?report=genbank&log$=nucltop&blast_rank=12&RID=E5WJ9RDV013","NZ_CP011339.1")
Microcystis sp. MC19 chromosome, complete genome	Microcystis sp. MC19	1946	1946	0.98	0.0	77.14	5020243	=HYPERLINK("https://www.ncbi.nlm.nih.gov/nucleotide/NZ_CP020664.1?report=genbank&log$=nucltop&blast_rank=15&RID=E5WJ9RDV013","NZ_CP020664.1")
Microcystis viridis NIES-102 chromosome, complete genome	Microcystis viridis NIES-102	1943	1943	0.98	0.0	77.05	5874197	=HYPERLINK("https://www.ncbi.nlm.nih.gov/nucleotide/NZ_AP019314.1?report=genbank&log$=nucltop&blast_rank=17&RID=E5WJ9RDV013","NZ_AP019314.1")
Nodularia spumigena UHCC 0039 chromosome, complete genome	Nodularia spumigena UHCC 0039	1735	1735	0.97	0.0	68.40	5294286	=HYPERLINK("https://www.ncbi.nlm.nih.gov/nucleotide/NZ_CP020114.1?report=genbank&log$=nucltop&blast_rank=73&RID=E5WJ9RDV013","NZ_CP020114.1")
'Nostoc azollae' 0708, complete sequence	'Nostoc azollae' 0708	827	1469	0.97	0.0	58.18	5354700	=HYPERLINK("https://www.ncbi.nlm.nih.gov/nucleotide/NC_014248.1?report=genbank&log$=nucltop&blast_rank=112&RID=E5WJ9RDV013","NC_014248.1")
Nostoc edaphicum CCNP1411 chromosome, complete genome	Nostoc edaphicum CCNP1411	1728	1728	0.97	0.0	68.01	7733505	=HYPERLINK("https://www.ncbi.nlm.nih.gov/nucleotide/NZ_CP054698.1?report=genbank&log$=nucltop&blast_rank=78&RID=E5WJ9RDV013","NZ_CP054698.1")
Nostoc flagelliforme CCNUN1 chromosome, complete genome	Nostoc flagelliforme CCNUN1	1716	1781	0.97	0.0	67.76	8363872	=HYPERLINK("https://www.ncbi.nlm.nih.gov/nucleotide/NZ_CP024785.1?report=genbank&log$=nucltop&blast_rank=84&RID=E5WJ9RDV013","NZ_CP024785.1")
Nostoc punctiforme PCC 73102, complete sequence	Nostoc punctiforme PCC 73102	1732	1732	0.97	0.0	67.19	8234322	=HYPERLINK("https://www.ncbi.nlm.nih.gov/nucleotide/NC_010628.1?report=genbank&log$=nucltop&blast_rank=76&RID=E5WJ9RDV013","NC_010628.1")
Nostoc sp. ATCC 53789 chromosome, complete genome	Nostoc sp. ATCC 53789	1744	3952	0.98	0.0	67.93	7340101	=HYPERLINK("https://www.ncbi.nlm.nih.gov/nucleotide/NZ_CP046703.1?report=genbank&log$=nucltop&blast_rank=70&RID=E5WJ9RDV013","NZ_CP046703.1")
Nostoc sp. C052 chromosome, complete genome	Nostoc sp. C052	1734	1734	0.97	0.0	68.45	7828336	=HYPERLINK("https://www.ncbi.nlm.nih.gov/nucleotide/NZ_CP040272.1?report=genbank&log$=nucltop&blast_rank=74&RID=E5WJ9RDV013","NZ_CP040272.1")
Nostoc sp. C057 chromosome, complete genome	Nostoc sp. C057	1742	3953	0.98	0.0	68.02	7495445	=HYPERLINK("https://www.ncbi.nlm.nih.gov/nucleotide/NZ_CP040281.1?report=genbank&log$=nucltop&blast_rank=71&RID=E5WJ9RDV013","NZ_CP040281.1")
Nostoc sp. CENA543 chromosome, complete genome	Nostoc sp. CENA543	1811	3554	0.98	0.0	71.63	6990729	=HYPERLINK("https://www.ncbi.nlm.nih.gov/nucleotide/NZ_CP023278.1?report=genbank&log$=nucltop&blast_rank=29&RID=E5WJ9RDV013","NZ_CP023278.1")
Nostoc sp. HK-01 DNA, complete genome	Nostoc sp. HK-01	1786	3459	0.97	0.0	71.20	6494018	=HYPERLINK("https://www.ncbi.nlm.nih.gov/nucleotide/AP018318.1?report=genbank&log$=nucltop&blast_rank=43&RID=E5WJ9RDV013","AP018318.1")
Nostoc sp. 'Lobaria pulmonaria (5183) cyanobiont' strain 5183 chromosome, complete genome	Nostoc sp. 'Lobaria pulmonaria (5183) cyanobiont'	1740	1807	0.97	0.0	68.95	7061466	=HYPERLINK("https://www.ncbi.nlm.nih.gov/nucleotide/NZ_CP026692.1?report=genbank&log$=nucltop&blast_rank=72&RID=E5WJ9RDV013","NZ_CP026692.1")
Nostoc sp. NIES-3756 chromosome, complete genome	Nostoc sp. NIES-3756	1745	3480	0.98	0.0	69.01	6463965	=HYPERLINK("https://www.ncbi.nlm.nih.gov/nucleotide/NZ_AP017295.1?report=genbank&log$=nucltop&blast_rank=69&RID=E5WJ9RDV013","NZ_AP017295.1")
Nostoc sp. PCC 7107, complete sequence	Nostoc sp. PCC 7107	1726	1726	0.97	0.0	67.99	6329823	=HYPERLINK("https://www.ncbi.nlm.nih.gov/nucleotide/NC_019676.1?report=genbank&log$=nucltop&blast_rank=80&RID=E5WJ9RDV013","NC_019676.1")
Nostoc sp. PCC 7120 = FACHB-418, complete sequence	Nostoc sp. PCC 7120 = FACHB-418	1766	3504	0.97	0.0	71.14	6413771	=HYPERLINK("https://www.ncbi.nlm.nih.gov/nucleotide/NC_003272.1?report=genbank&log$=nucltop&blast_rank=52&RID=E5WJ9RDV013","NC_003272.1")
Nostoc sp. PCC 7524, complete sequence	Nostoc sp. PCC 7524	1779	3540	0.98	0.0	69.69	6635030	=HYPERLINK("https://www.ncbi.nlm.nih.gov/nucleotide/NC_019684.1?report=genbank&log$=nucltop&blast_rank=44&RID=E5WJ9RDV013","NC_019684.1")
Nostoc sp. 'Peltigera membranacea cyanobiont' N6 chromosome, complete genome	Nostoc sp. 'Peltigera membranacea cyanobiont' N6	1714	1714	0.97	0.0	67.30	8214648	=HYPERLINK("https://www.ncbi.nlm.nih.gov/nucleotide/NZ_CP026681.1?report=genbank&log$=nucltop&blast_rank=85&RID=E5WJ9RDV013","NZ_CP026681.1")
Nostoc sp. TCL240-02 chromosome, complete genome	Nostoc sp. TCL240-02	1733	2218	0.98	0.0	68.45	7887247	=HYPERLINK("https://www.ncbi.nlm.nih.gov/nucleotide/NZ_CP040094.1?report=genbank&log$=nucltop&blast_rank=75&RID=E5WJ9RDV013","NZ_CP040094.1")
Nostoc sp. TCL26-01 chromosome, complete genome	Nostoc sp. TCL26-01	1749	1749	0.97	0.0	69.92	6765102	=HYPERLINK("https://www.ncbi.nlm.nih.gov/nucleotide/NZ_CP040297.1?report=genbank&log$=nucltop&blast_rank=66&RID=E5WJ9RDV013","NZ_CP040297.1")
Nostoc sp. UHCC 0702 chromosome, complete genome	Nostoc sp. UHCC 0702	1264	1758	0.97	0.0	70.31	8587404	=HYPERLINK("https://www.ncbi.nlm.nih.gov/nucleotide/NZ_CP071065.1?report=genbank&log$=nucltop&blast_rank=110&RID=E5WJ9RDV013","NZ_CP071065.1")
Nostoc sphaeroides CCNUC1 chromosome Gxm1, complete sequence	Nostoc sphaeroides CCNUC1	1716	1716	0.97	0.0	67.24	6481972	=HYPERLINK("https://www.ncbi.nlm.nih.gov/nucleotide/NZ_CP045226.1?report=genbank&log$=nucltop&blast_rank=83&RID=E5WJ9RDV013","NZ_CP045226.1")
Nostoc sphaeroides strain Kutzing En chromosome, complete genome	Nostoc sphaeroides	1717	1932	0.97	0.0	67.43	6531820	=HYPERLINK("https://www.ncbi.nlm.nih.gov/nucleotide/NZ_CP031941.1?report=genbank&log$=nucltop&blast_rank=82&RID=E5WJ9RDV013","NZ_CP031941.1")
Nostocales cyanobacterium HT-58-2, complete genome	Nostocales cyanobacterium HT-58-2	1747	3471	0.98	0.0	69.30	7846907	=HYPERLINK("https://www.ncbi.nlm.nih.gov/nucleotide/NZ_CP019636.1?report=genbank&log$=nucltop&blast_rank=67&RID=E5WJ9RDV013","NZ_CP019636.1")
Oscillatoria acuminata PCC 6304, complete sequence	Oscillatoria acuminata PCC 6304	1849	1849	0.98	0.0	72.46	7689443	=HYPERLINK("https://www.ncbi.nlm.nih.gov/nucleotide/NC_019693.1?report=genbank&log$=nucltop&blast_rank=24&RID=E5WJ9RDV013","NC_019693.1")
Oscillatoria nigro-viridis PCC 7112, complete sequence	Oscillatoria nigro-viridis PCC 7112	1800	1800	0.99	0.0	71.25	7479014	=HYPERLINK("https://www.ncbi.nlm.nih.gov/nucleotide/NC_019729.1?report=genbank&log$=nucltop&blast_rank=36&RID=E5WJ9RDV013","NC_019729.1")
Oxynema sp. AP17 chromosome, complete genome	Oxynema sp. AP17	1759	1759	0.98	0.0	70.20	6357750	=HYPERLINK("https://www.ncbi.nlm.nih.gov/nucleotide/NZ_CP051167.1?report=genbank&log$=nucltop&blast_rank=59&RID=E5WJ9RDV013","NZ_CP051167.1")
Planktothrix agardhii NIES-204 DNA, complete genome	Planktothrix agardhii NIES-204	1803	1803	0.98	0.0	72.14	4780238	=HYPERLINK("https://www.ncbi.nlm.nih.gov/nucleotide/AP017991.1?report=genbank&log$=nucltop&blast_rank=35&RID=E5WJ9RDV013","AP017991.1")
Pleurocapsa sp. PCC 7327, complete sequence	Pleurocapsa sp. PCC 7327	1808	1808	0.98	0.0	72.79	4986817	=HYPERLINK("https://www.ncbi.nlm.nih.gov/nucleotide/NC_019689.1?report=genbank&log$=nucltop&blast_rank=31&RID=E5WJ9RDV013","NC_019689.1")
Prochlorococcus marinus str. MIT 9303, complete genome	Prochlorococcus marinus str. MIT 9303	210	291	0.82	4e-53	25.59	2682675	=HYPERLINK("https://www.ncbi.nlm.nih.gov/nucleotide/NC_008820.1?report=genbank&log$=nucltop&blast_rank=116&RID=E5WJ9RDV013","NC_008820.1")
Prochlorococcus marinus str. MIT 9313, complete sequence	Prochlorococcus marinus str. MIT 9313	207	290	0.82	2e-52	25.59	2410873	=HYPERLINK("https://www.ncbi.nlm.nih.gov/nucleotide/NC_005071.1?report=genbank&log$=nucltop&blast_rank=117&RID=E5WJ9RDV013","NC_005071.1")
Rippkaea orientalis PCC 8801, complete sequence	Rippkaea orientalis PCC 8801	1934	1934	0.98	0.0	75.31	4679413	=HYPERLINK("https://www.ncbi.nlm.nih.gov/nucleotide/NC_011726.1?report=genbank&log$=nucltop&blast_rank=21&RID=E5WJ9RDV013","NC_011726.1")
Rippkaea orientalis PCC 8802, complete sequence	Rippkaea orientalis PCC 8802	1937	1937	0.98	0.0	75.56	4669813	=HYPERLINK("https://www.ncbi.nlm.nih.gov/nucleotide/NC_013161.1?report=genbank&log$=nucltop&blast_rank=20&RID=E5WJ9RDV013","NC_013161.1")
Rivularia sp. PCC 7116, complete sequence	Rivularia sp. PCC 7116	1673	1673	0.98	0.0	67.59	8698463	=HYPERLINK("https://www.ncbi.nlm.nih.gov/nucleotide/NC_019678.1?report=genbank&log$=nucltop&blast_rank=91&RID=E5WJ9RDV013","NC_019678.1")
Stanieria sp. NIES-3757 DNA, complete genome	Stanieria sp. NIES-3757	1825	1825	0.97	0.0	72.78	5319768	=HYPERLINK("https://www.ncbi.nlm.nih.gov/nucleotide/NZ_AP017375.1?report=genbank&log$=nucltop&blast_rank=26&RID=E5WJ9RDV013","NZ_AP017375.1")
Synechococcus elongatus PCC 6301, complete sequence	Synechococcus elongatus PCC 6301	1599	1599	0.97	0.0	65.91	2696255	=HYPERLINK("https://www.ncbi.nlm.nih.gov/nucleotide/NC_006576.1?report=genbank&log$=nucltop&blast_rank=95&RID=E5WJ9RDV013","NC_006576.1")
Synechococcus elongatus PCC 7942 = FACHB-805, complete sequence	Synechococcus elongatus PCC 7942 = FACHB-805	1600	1600	0.97	0.0	65.99	2695903	=HYPERLINK("https://www.ncbi.nlm.nih.gov/nucleotide/NC_007604.1?report=genbank&log$=nucltop&blast_rank=94&RID=E5WJ9RDV013","NC_007604.1")
Synechococcus elongatus UTEX 3055 chromosome, complete genome	Synechococcus elongatus UTEX 3055	1624	1624	0.97	0.0	65.99	2767524	=HYPERLINK("https://www.ncbi.nlm.nih.gov/nucleotide/NZ_CP033061.1?report=genbank&log$=nucltop&blast_rank=92&RID=E5WJ9RDV013","NZ_CP033061.1")
Synechococcus sp. CB0101 chromosome, complete genome	Synechococcus sp. CB0101	1477	1477	0.97	0.0	61.51	2789647	=HYPERLINK("https://www.ncbi.nlm.nih.gov/nucleotide/NZ_CP039373.1?report=genbank&log$=nucltop&blast_rank=107&RID=E5WJ9RDV013","NZ_CP039373.1")
Synechococcus sp. CBW1002 chromosome, complete genome	Synechococcus sp. CBW1002	1506	1506	0.97	0.0	59.87	3854122	=HYPERLINK("https://www.ncbi.nlm.nih.gov/nucleotide/NZ_CP060398.1?report=genbank&log$=nucltop&blast_rank=101&RID=E5WJ9RDV013","NZ_CP060398.1")
Synechococcus sp. CBW1004 chromosome, complete genome	Synechococcus sp. CBW1004	1410	1410	0.97	0.0	58.55	3672318	=HYPERLINK("https://www.ncbi.nlm.nih.gov/nucleotide/NZ_CP060397.1?report=genbank&log$=nucltop&blast_rank=109&RID=E5WJ9RDV013","NZ_CP060397.1")
Synechococcus sp. CBW1006 chromosome, complete genome	Synechococcus sp. CBW1006	1503	1503	0.97	0.0	59.47	3860130	=HYPERLINK("https://www.ncbi.nlm.nih.gov/nucleotide/NZ_CP060396.1?report=genbank&log$=nucltop&blast_rank=102&RID=E5WJ9RDV013","NZ_CP060396.1")
Synechococcus sp. CBW1107 chromosome, complete genome	Synechococcus sp. CBW1107	1479	1479	0.97	0.0	59.92	3202093	=HYPERLINK("https://www.ncbi.nlm.nih.gov/nucleotide/NZ_CP064908.1?report=genbank&log$=nucltop&blast_rank=105&RID=E5WJ9RDV013","NZ_CP064908.1")
Synechococcus sp. CBW1108 chromosome, complete genome	Synechococcus sp. CBW1108	1538	1538	0.97	0.0	64.12	3226220	=HYPERLINK("https://www.ncbi.nlm.nih.gov/nucleotide/NZ_CP060395.1?report=genbank&log$=nucltop&blast_rank=96&RID=E5WJ9RDV013","NZ_CP060395.1")
Synechococcus sp. NIES-970 DNA, complete genome	Synechococcus sp. NIES-970	1768	1768	0.98	0.0	71.09	2836539	=HYPERLINK("https://www.ncbi.nlm.nih.gov/nucleotide/NZ_AP017959.1?report=genbank&log$=nucltop&blast_rank=50&RID=E5WJ9RDV013","NZ_AP017959.1")
Synechococcus sp. PCC 7002, complete sequence	Synechococcus sp. PCC 7002	1791	1791	0.97	0.0	71.99	3008047	=HYPERLINK("https://www.ncbi.nlm.nih.gov/nucleotide/NC_010475.1?report=genbank&log$=nucltop&blast_rank=41&RID=E5WJ9RDV013","NC_010475.1")
Synechococcus sp. PCC 7003 chromosome, complete genome	Synechococcus sp. PCC 7003	1812	1812	0.97	0.0	71.90	3057091	=HYPERLINK("https://www.ncbi.nlm.nih.gov/nucleotide/NZ_CP016474.1?report=genbank&log$=nucltop&blast_rank=28&RID=E5WJ9RDV013","NZ_CP016474.1")
Synechococcus sp. PCC 7117 chromosome, complete genome	Synechococcus sp. PCC 7117	1793	1793	0.97	0.0	71.90	3087720	=HYPERLINK("https://www.ncbi.nlm.nih.gov/nucleotide/NZ_CP016477.1?report=genbank&log$=nucltop&blast_rank=39&RID=E5WJ9RDV013","NZ_CP016477.1")
Synechococcus sp. PCC 73109 chromosome, complete genome	Synechococcus sp. PCC 73109	1815	1815	0.97	0.0	71.90	3025472	=HYPERLINK("https://www.ncbi.nlm.nih.gov/nucleotide/NZ_CP013998.1?report=genbank&log$=nucltop&blast_rank=27&RID=E5WJ9RDV013","NZ_CP013998.1")
Synechococcus sp. PCC 8807 chromosome, complete genome	Synechococcus sp. PCC 8807	1797	1797	0.97	0.0	72.16	3059495	=HYPERLINK("https://www.ncbi.nlm.nih.gov/nucleotide/NZ_CP016483.1?report=genbank&log$=nucltop&blast_rank=38&RID=E5WJ9RDV013","NZ_CP016483.1")
Synechococcus sp. RSCCF101 chromosome, complete genome	Synechococcus sp. RSCCF101	1481	1481	0.97	0.0	61.21	2984853	=HYPERLINK("https://www.ncbi.nlm.nih.gov/nucleotide/NZ_CP035632.1?report=genbank&log$=nucltop&blast_rank=104&RID=E5WJ9RDV013","NZ_CP035632.1")
Synechococcus sp. SynAce01, complete genome	Synechococcus sp. SynAce01	1479	1479	0.97	0.0	61.43	2750634	=HYPERLINK("https://www.ncbi.nlm.nih.gov/nucleotide/NZ_CP018091.1?report=genbank&log$=nucltop&blast_rank=106&RID=E5WJ9RDV013","NZ_CP018091.1")
Synechococcus sp. UTEX 2973 chromosome, complete genome	Synechococcus sp. UTEX 2973	1600	1600	0.97	0.0	65.99	2690418	=HYPERLINK("https://www.ncbi.nlm.nih.gov/nucleotide/NZ_CP006471.1?report=genbank&log$=nucltop&blast_rank=93&RID=E5WJ9RDV013","NZ_CP006471.1")
Synechococcus sp. WH 8101 chromosome, complete genome	Synechococcus sp. WH 8101	1526	1526	0.97	0.0	62.87	2623023	=HYPERLINK("https://www.ncbi.nlm.nih.gov/nucleotide/NZ_CP047932.1?report=genbank&log$=nucltop&blast_rank=98&RID=E5WJ9RDV013","NZ_CP047932.1")
Synechococcus sp. WH 8101 chromosome, complete genome	Synechococcus sp. WH 8101	1526	1526	0.97	0.0	62.87	2630292	=HYPERLINK("https://www.ncbi.nlm.nih.gov/nucleotide/NZ_CP035914.1?report=genbank&log$=nucltop&blast_rank=99&RID=E5WJ9RDV013","NZ_CP035914.1")
Synechocystis sp. IPPAS B-1465 chromosome, complete genome	Synechocystis sp. IPPAS B-1465	2502	2502	1	0.0	100.00	3574310	=HYPERLINK("https://www.ncbi.nlm.nih.gov/nucleotide/NZ_CP028094.1?report=genbank&log$=nucltop&blast_rank=3&RID=E5WJ9RDV013","NZ_CP028094.1")
Synechocystis sp. PCC 6714 chromosome, complete genome	Synechocystis sp. PCC 6714	2232	2232	0.99	0.0	90.17	3485441	=HYPERLINK("https://www.ncbi.nlm.nih.gov/nucleotide/NZ_CP007542.1?report=genbank&log$=nucltop&blast_rank=9&RID=E5WJ9RDV013","NZ_CP007542.1")
Synechocystis sp. PCC 6803 substr. GT-I, complete sequence	Synechocystis sp. PCC 6803 substr. GT-I	2502	2502	1	0.0	100.00	3570004	=HYPERLINK("https://www.ncbi.nlm.nih.gov/nucleotide/NC_017038.1?report=genbank&log$=nucltop&blast_rank=7&RID=E5WJ9RDV013","NC_017038.1")
Synechocystis sp. PCC 6803 substr. PCC-N, complete sequence	Synechocystis sp. PCC 6803 substr. PCC-N	2502	2502	1	0.0	100.00	3570103	=HYPERLINK("https://www.ncbi.nlm.nih.gov/nucleotide/NC_017052.1?report=genbank&log$=nucltop&blast_rank=5&RID=E5WJ9RDV013","NC_017052.1")
Synechocystis sp. PCC 6803 substr. PCC-P, complete sequence	Synechocystis sp. PCC 6803 substr. PCC-P	2502	2502	1	0.0	100.00	3570114	=HYPERLINK("https://www.ncbi.nlm.nih.gov/nucleotide/NC_017039.1?report=genbank&log$=nucltop&blast_rank=6&RID=E5WJ9RDV013","NC_017039.1")
Synechocystis sp. PCC 6803 substrain GT-G, complete genome	Synechocystis sp. PCC 6803	2502	2502	1	0.0	100.00	3569196	=HYPERLINK("https://www.ncbi.nlm.nih.gov/nucleotide/NZ_CP012832.1?report=genbank&log$=nucltop&blast_rank=2&RID=E5WJ9RDV013","NZ_CP012832.1")
Synechocystis sp. PCC 6803, complete sequence	Synechocystis sp. PCC 6803	2502	2502	1	0.0	100.00	3569561	=HYPERLINK("https://www.ncbi.nlm.nih.gov/nucleotide/NC_020286.1?report=genbank&log$=nucltop&blast_rank=1&RID=E5WJ9RDV013","NC_020286.1")
Synechocystis sp. PCC 6803, complete sequence	Synechocystis sp. PCC 6803	2502	2502	1	0.0	100.00	3571103	=HYPERLINK("https://www.ncbi.nlm.nih.gov/nucleotide/NC_017277.1?report=genbank&log$=nucltop&blast_rank=4&RID=E5WJ9RDV013","NC_017277.1")
Synechocystis sp. PCC 6803, complete sequence	Synechocystis sp. PCC 6803	2502	2502	1	0.0	100.00	3573470	=HYPERLINK("https://www.ncbi.nlm.nih.gov/nucleotide/NC_000911.1?report=genbank&log$=nucltop&blast_rank=8&RID=E5WJ9RDV013","NC_000911.1")
Tolypothrix sp. PCC 7910 chromosome, complete genome	Tolypothrix sp. PCC 7910	1749	3476	0.99	0.0	68.62	8479123	=HYPERLINK("https://www.ncbi.nlm.nih.gov/nucleotide/NZ_CP050440.1?report=genbank&log$=nucltop&blast_rank=65&RID=E5WJ9RDV013","NZ_CP050440.1")
Trichormus variabilis 0441 chromosome, complete genome	Trichormus variabilis 0441	1763	3518	0.97	0.0	70.74	6377767	=HYPERLINK("https://www.ncbi.nlm.nih.gov/nucleotide/NZ_CP047242.1?report=genbank&log$=nucltop&blast_rank=56&RID=E5WJ9RDV013","NZ_CP047242.1")
Trichormus variabilis ATCC 29413, complete sequence	Trichormus variabilis ATCC 29413	1763	3518	0.97	0.0	70.74	6365727	=HYPERLINK("https://www.ncbi.nlm.nih.gov/nucleotide/NC_007413.1?report=genbank&log$=nucltop&blast_rank=58&RID=E5WJ9RDV013","NC_007413.1")

## Sheet: PsbD
Description	Scientific Name	Max Score	Total Score	Query Cover	E value	Per. ident	Acc. Len	Accession
[Phormidium] sp. ETS-05 chromosome, complete genome	[Phormidium] sp. ETS-05	533	2095	1	1e-171	83.33	6286783	=HYPERLINK("https://www.ncbi.nlm.nih.gov/nucleotide/NZ_CP051168.1?report=genbank&log$=nucltop&blast_rank=201&RID=E60JDUH1013","NZ_CP051168.1")
Acaryochloris marina MBIC11017, complete sequence	Acaryochloris marina MBIC11017	642	2415	1	0.0	88.07	6503724	=HYPERLINK("https://www.ncbi.nlm.nih.gov/nucleotide/NC_009925.1?report=genbank&log$=nucltop&blast_rank=180&RID=E60JDUH1013","NC_009925.1")
Anabaena cylindrica PCC 7122, complete sequence	Anabaena cylindrica PCC 7122	666	2142	1	0.0	92.90	6395836	=HYPERLINK("https://www.ncbi.nlm.nih.gov/nucleotide/NC_019771.1?report=genbank&log$=nucltop&blast_rank=81&RID=E60JDUH1013","NC_019771.1")
Anabaena sp. 90 chromosome chANA01, complete sequence	Anabaena sp. 90	671	1664	1	0.0	92.61	4329264	=HYPERLINK("https://www.ncbi.nlm.nih.gov/nucleotide/NC_019427.1?report=genbank&log$=nucltop&blast_rank=51&RID=E60JDUH1013","NC_019427.1")
Anabaena sp. WA102, complete sequence	Anabaena sp. WA102	671	1826	1	0.0	92.61	5705437	=HYPERLINK("https://www.ncbi.nlm.nih.gov/nucleotide/NZ_CP011456.1?report=genbank&log$=nucltop&blast_rank=52&RID=E60JDUH1013","NZ_CP011456.1")
Anabaena sp. YBS01 chromosome, complete genome	Anabaena sp. YBS01	654	1453	1	0.0	91.64	7013200	=HYPERLINK("https://www.ncbi.nlm.nih.gov/nucleotide/NZ_CP034058.1?report=genbank&log$=nucltop&blast_rank=127&RID=E60JDUH1013","NZ_CP034058.1")
Aphanizomenon flos-aquae DEX188 chromosome, complete genome	Aphanizomenon flos-aquae DEX188	673	1828	1	0.0	93.75	4538078	=HYPERLINK("https://www.ncbi.nlm.nih.gov/nucleotide/CP051188.1?report=genbank&log$=nucltop&blast_rank=39&RID=E60JDUH1013","CP051188.1")
Aphanizomenon flos-aquae KM1D3_PB chromosome, complete genome	Aphanizomenon flos-aquae KM1D3_PB	671	1986	1	0.0	92.61	6071322	=HYPERLINK("https://www.ncbi.nlm.nih.gov/nucleotide/CP051528.1?report=genbank&log$=nucltop&blast_rank=53&RID=E60JDUH1013","CP051528.1")
Arthrospira sp. PCC 9108 chromosome, complete genome	Arthrospira sp. PCC 9108	651	2031	1	0.0	89.49	6763964	=HYPERLINK("https://www.ncbi.nlm.nih.gov/nucleotide/NZ_CP066886.1?report=genbank&log$=nucltop&blast_rank=163&RID=E60JDUH1013","NZ_CP066886.1")
Arthrospira sp. TJSD092 chromosome, complete genome	Arthrospira sp. TJSD092	651	2174	1	0.0	89.49	6434389	=HYPERLINK("https://www.ncbi.nlm.nih.gov/nucleotide/NZ_CP028914.1?report=genbank&log$=nucltop&blast_rank=165&RID=E60JDUH1013","NZ_CP028914.1")
Calothrix sp. 336/3 chromosome, complete genome	Calothrix sp. 336/3	665	1824	1	0.0	91.48	6283267	=HYPERLINK("https://www.ncbi.nlm.nih.gov/nucleotide/NZ_CP011382.1?report=genbank&log$=nucltop&blast_rank=85&RID=E60JDUH1013","NZ_CP011382.1")
Calothrix sp. NIES-2098 DNA, complete genome	Calothrix sp. NIES-2098	659	2401	1	0.0	90.34	8656060	=HYPERLINK("https://www.ncbi.nlm.nih.gov/nucleotide/NZ_AP018172.1?report=genbank&log$=nucltop&blast_rank=101&RID=E60JDUH1013","NZ_AP018172.1")
Calothrix sp. NIES-3974 chromosome, complete genome	Calothrix sp. NIES-3974	670	2903	1	0.0	91.76	5985875	=HYPERLINK("https://www.ncbi.nlm.nih.gov/nucleotide/NZ_AP018254.1?report=genbank&log$=nucltop&blast_rank=65&RID=E60JDUH1013","NZ_AP018254.1")
Calothrix sp. NIES-4071 DNA, complete genome	Calothrix sp. NIES-4071	669	1975	1	0.0	92.05	11064963	=HYPERLINK("https://www.ncbi.nlm.nih.gov/nucleotide/NZ_AP018255.1?report=genbank&log$=nucltop&blast_rank=74&RID=E60JDUH1013","NZ_AP018255.1")
Calothrix sp. NIES-4101 DNA, complete genome	Calothrix sp. NIES-4101	667	1819	1	0.0	92.05	7235916	=HYPERLINK("https://www.ncbi.nlm.nih.gov/nucleotide/AP018280.1?report=genbank&log$=nucltop&blast_rank=77&RID=E60JDUH1013","AP018280.1")
Calothrix sp. PCC 6303, complete sequence	Calothrix sp. PCC 6303	672	1985	1	0.0	92.90	6767834	=HYPERLINK("https://www.ncbi.nlm.nih.gov/nucleotide/NC_019751.1?report=genbank&log$=nucltop&blast_rank=46&RID=E60JDUH1013","NC_019751.1")
Calothrix sp. PCC 7507, complete sequence	Calothrix sp. PCC 7507	659	2857	1	0.0	90.62	7023215	=HYPERLINK("https://www.ncbi.nlm.nih.gov/nucleotide/NC_019682.1?report=genbank&log$=nucltop&blast_rank=103&RID=E60JDUH1013","NC_019682.1")
Chondrocystis sp. NIES-4102 DNA, complete genome	Chondrocystis sp. NIES-4102	637	2078	1	0.0	86.65	4516676	=HYPERLINK("https://www.ncbi.nlm.nih.gov/nucleotide/NZ_AP018281.1?report=genbank&log$=nucltop&blast_rank=181&RID=E60JDUH1013","NZ_AP018281.1")
Chroococcidiopsis thermalis PCC 7203, complete sequence	Chroococcidiopsis thermalis PCC 7203	649	2851	1	0.0	88.92	6315792	=HYPERLINK("https://www.ncbi.nlm.nih.gov/nucleotide/NC_019695.1?report=genbank&log$=nucltop&blast_rank=172&RID=E60JDUH1013","NC_019695.1")
Crinalium epipsammum PCC 9333, complete sequence	Crinalium epipsammum PCC 9333	654	1624	1	0.0	89.20	5315554	=HYPERLINK("https://www.ncbi.nlm.nih.gov/nucleotide/NC_019753.1?report=genbank&log$=nucltop&blast_rank=144&RID=E60JDUH1013","NC_019753.1")
Crocosphaera subtropica ATCC 51142 chromosome circular, complete sequence	Crocosphaera subtropica ATCC 51142	675	2128	1	0.0	93.75	4934271	=HYPERLINK("https://www.ncbi.nlm.nih.gov/nucleotide/NC_010546.1?report=genbank&log$=nucltop&blast_rank=29&RID=E60JDUH1013","NC_010546.1")
Cyanobacterium aponinum PCC 10605, complete sequence	Cyanobacterium aponinum PCC 10605	673	1962	1	0.0	92.90	4114099	=HYPERLINK("https://www.ncbi.nlm.nih.gov/nucleotide/NC_019776.1?report=genbank&log$=nucltop&blast_rank=40&RID=E60JDUH1013","NC_019776.1")
Cyanobacterium sp. HL-69 chromosome, complete genome	Cyanobacterium sp. HL-69	678	1826	1	0.0	93.47	3155247	=HYPERLINK("https://www.ncbi.nlm.nih.gov/nucleotide/CP024912.1?report=genbank&log$=nucltop&blast_rank=23&RID=E60JDUH1013","CP024912.1")
Cyanobacterium stanieri PCC 7202, complete genome	Cyanobacterium stanieri PCC 7202	679	1681	1	0.0	93.75	3163381	=HYPERLINK("https://www.ncbi.nlm.nih.gov/nucleotide/NC_019778.1?report=genbank&log$=nucltop&blast_rank=21&RID=E60JDUH1013","NC_019778.1")
Cyanobium gracile PCC 6307, complete sequence	Cyanobium gracile PCC 6307	659	1903	1	0.0	89.77	3342364	=HYPERLINK("https://www.ncbi.nlm.nih.gov/nucleotide/NC_019675.1?report=genbank&log$=nucltop&blast_rank=104&RID=E60JDUH1013","NC_019675.1")
Cyanobium sp. M30B3 chromosome, complete genome	Cyanobium sp. M30B3	657	1926	1	0.0	90.06	3180296	=HYPERLINK("https://www.ncbi.nlm.nih.gov/nucleotide/NZ_CP073761.1?report=genbank&log$=nucltop&blast_rank=111&RID=E60JDUH1013","NZ_CP073761.1")
Cyanobium sp. NIES-981 chromosome I, complete sequence	Cyanobium sp. NIES-981	669	1956	1	0.0	91.19	3021545	=HYPERLINK("https://www.ncbi.nlm.nih.gov/nucleotide/NZ_LT578417.1?report=genbank&log$=nucltop&blast_rank=72&RID=E60JDUH1013","NZ_LT578417.1")
Cyanobium sp. NS01 chromosome, complete genome	Cyanobium sp. NS01	657	1926	1	0.0	90.06	2748087	=HYPERLINK("https://www.ncbi.nlm.nih.gov/nucleotide/NZ_CP047940.1?report=genbank&log$=nucltop&blast_rank=108&RID=E60JDUH1013","NZ_CP047940.1")
Cyanothece sp. PCC 7425, complete sequence	Cyanothece sp. PCC 7425	657	1792	1	0.0	90.06	5374574	=HYPERLINK("https://www.ncbi.nlm.nih.gov/nucleotide/NC_011884.1?report=genbank&log$=nucltop&blast_rank=107&RID=E60JDUH1013","NC_011884.1")
Cylindrospermopsis curvispora GIHE-G1 chromosome, complete genome	Cylindrospermopsis curvispora GIHE-G1	669	2766	1	0.0	93.18	3910736	=HYPERLINK("https://www.ncbi.nlm.nih.gov/nucleotide/NZ_CP060822.1?report=genbank&log$=nucltop&blast_rank=70&RID=E60JDUH1013","NZ_CP060822.1")
Cylindrospermopsis raciborskii N8 chromosome, complete genome	Cylindrospermopsis raciborskii N8	669	2794	1	0.0	93.18	3857174	=HYPERLINK("https://www.ncbi.nlm.nih.gov/nucleotide/NZ_CP073250.1?report=genbank&log$=nucltop&blast_rank=71&RID=E60JDUH1013","NZ_CP073250.1")
Dactylococcopsis salina PCC 8305, complete sequence	Dactylococcopsis salina PCC 8305	647	1779	1	0.0	90.37	3781008	=HYPERLINK("https://www.ncbi.nlm.nih.gov/nucleotide/NC_019780.1?report=genbank&log$=nucltop&blast_rank=177&RID=E60JDUH1013","NC_019780.1")
Dolichospermum flos-aquae CCAP 1403/13F chromosome, complete genome	Dolichospermum flos-aquae CCAP 1403/13F	671	1821	1	0.0	92.61	5151752	=HYPERLINK("https://www.ncbi.nlm.nih.gov/nucleotide/NZ_CP051206.1?report=genbank&log$=nucltop&blast_rank=48&RID=E60JDUH1013","NZ_CP051206.1")
Dolichospermum sp. DET69 chromosome, complete genome	Dolichospermum sp. DET69	670	1818	1	0.0	92.33	5839262	=HYPERLINK("https://www.ncbi.nlm.nih.gov/nucleotide/CP070233.1?report=genbank&log$=nucltop&blast_rank=67&RID=E60JDUH1013","CP070233.1")
Dolichospermum sp. DL01 chromosome, complete genome	Dolichospermum sp. DL01	671	1821	1	0.0	92.61	4827232	=HYPERLINK("https://www.ncbi.nlm.nih.gov/nucleotide/CP050884.1?report=genbank&log$=nucltop&blast_rank=54&RID=E60JDUH1013","CP050884.1")
Dolichospermum sp. LBC05a chromosome, complete genome	Dolichospermum sp. LBC05a	671	1822	1	0.0	92.61	5178591	=HYPERLINK("https://www.ncbi.nlm.nih.gov/nucleotide/CP050882.1?report=genbank&log$=nucltop&blast_rank=55&RID=E60JDUH1013","CP050882.1")
Dolichospermum sp. UHCC 0315A chromosome, complete genome	Dolichospermum sp. UHCC 0315A	671	1823	1	0.0	92.61	5407479	=HYPERLINK("https://www.ncbi.nlm.nih.gov/nucleotide/NZ_CP043056.1?report=genbank&log$=nucltop&blast_rank=49&RID=E60JDUH1013","NZ_CP043056.1")
Dolichospermum sp. UKL201 chromosome, complete genome	Dolichospermum sp. UKL201	671	1821	1	0.0	92.61	5294355	=HYPERLINK("https://www.ncbi.nlm.nih.gov/nucleotide/CP050891.1?report=genbank&log$=nucltop&blast_rank=56&RID=E60JDUH1013","CP050891.1")
Euhalothece natronophila Z-M001 chromosome, complete genome	Euhalothece natronophila Z-M001	644	1908	1	0.0	89.52	3326959	=HYPERLINK("https://www.ncbi.nlm.nih.gov/nucleotide/NZ_CP042326.1?report=genbank&log$=nucltop&blast_rank=179&RID=E60JDUH1013","NZ_CP042326.1")
Fischerella sp. NIES-3754 chromosome, complete genome	Fischerella sp. NIES-3754	663	3099	1	0.0	91.48	5821603	=HYPERLINK("https://www.ncbi.nlm.nih.gov/nucleotide/NZ_AP017305.1?report=genbank&log$=nucltop&blast_rank=92&RID=E60JDUH1013","NZ_AP017305.1")
Geitlerinema sp. PCC 7407, complete sequence	Geitlerinema sp. PCC 7407	656	1798	1	0.0	90.06	4681111	=HYPERLINK("https://www.ncbi.nlm.nih.gov/nucleotide/NC_019703.1?report=genbank&log$=nucltop&blast_rank=114&RID=E60JDUH1013","NC_019703.1")
Geminocystis sp. NIES-3708 chromosome, complete genome	Geminocystis sp. NIES-3708	679	1670	1	0.0	94.60	3883409	=HYPERLINK("https://www.ncbi.nlm.nih.gov/nucleotide/NZ_AP014815.1?report=genbank&log$=nucltop&blast_rank=20&RID=E60JDUH1013","NZ_AP014815.1")
Geminocystis sp. NIES-3709 chromosome, complete genome	Geminocystis sp. NIES-3709	686	1833	1	0.0	95.45	4150181	=HYPERLINK("https://www.ncbi.nlm.nih.gov/nucleotide/NZ_AP014821.1?report=genbank&log$=nucltop&blast_rank=10&RID=E60JDUH1013","NZ_AP014821.1")
Gloeobacter kilaueensis JS1, complete sequence	Gloeobacter kilaueensis JS1	605	1509	1	0.0	83.00	4724791	=HYPERLINK("https://www.ncbi.nlm.nih.gov/nucleotide/NC_022600.1?report=genbank&log$=nucltop&blast_rank=197&RID=E60JDUH1013","NC_022600.1")
Gloeobacter violaceus PCC 7421, complete sequence	Gloeobacter violaceus PCC 7421	603	1360	1	0.0	81.87	4659019	=HYPERLINK("https://www.ncbi.nlm.nih.gov/nucleotide/NC_005125.1?report=genbank&log$=nucltop&blast_rank=199&RID=E60JDUH1013","NC_005125.1")
Gloeobacteraceae cyanobacterium 'cyano 109' chromosome, complete genome	Gloeobacteraceae cyanobacterium 'cyano 109'	615	1091	1	0.0	82.95	4187797	=HYPERLINK("https://www.ncbi.nlm.nih.gov/nucleotide/CP062698.1?report=genbank&log$=nucltop&blast_rank=186&RID=E60JDUH1013","CP062698.1")
Gloeocapsa sp. PCC 7428, complete sequence	Gloeocapsa sp. PCC 7428	649	2113	1	0.0	89.20	5431448	=HYPERLINK("https://www.ncbi.nlm.nih.gov/nucleotide/NC_019745.1?report=genbank&log$=nucltop&blast_rank=173&RID=E60JDUH1013","NC_019745.1")
Gloeothece citriformis PCC 7424, complete sequence	Gloeothece citriformis PCC 7424	678	2116	1	0.0	92.61	5942652	=HYPERLINK("https://www.ncbi.nlm.nih.gov/nucleotide/NC_011729.1?report=genbank&log$=nucltop&blast_rank=22&RID=E60JDUH1013","NC_011729.1")
Gloeothece verrucosa PCC 7822, complete sequence	Gloeothece verrucosa PCC 7822	675	1980	1	0.0	92.33	6091620	=HYPERLINK("https://www.ncbi.nlm.nih.gov/nucleotide/NC_014501.1?report=genbank&log$=nucltop&blast_rank=28&RID=E60JDUH1013","NC_014501.1")
Halomicronema hongdechloris C2206 chromosome	Halomicronema hongdechloris C2206	655	2672	1	0.0	88.64	5577845	=HYPERLINK("https://www.ncbi.nlm.nih.gov/nucleotide/NZ_CP021983.2?report=genbank&log$=nucltop&blast_rank=115&RID=E60JDUH1013","NZ_CP021983.2")
Halothece sp. PCC 7418, complete sequence	Halothece sp. PCC 7418	651	2089	1	0.0	90.93	4179170	=HYPERLINK("https://www.ncbi.nlm.nih.gov/nucleotide/NC_019779.1?report=genbank&log$=nucltop&blast_rank=161&RID=E60JDUH1013","NC_019779.1")
Leptolyngbya boryana dg5 chromosome	Leptolyngbya boryana dg5	650	1943	1	0.0	89.77	6176365	=HYPERLINK("https://www.ncbi.nlm.nih.gov/nucleotide/NZ_AP014642.1?report=genbank&log$=nucltop&blast_rank=170&RID=E60JDUH1013","NZ_AP014642.1")
Leptolyngbya boryana IAM M-101 chromosome	Leptolyngbya boryana IAM M-101	650	1943	1	0.0	89.77	6176364	=HYPERLINK("https://www.ncbi.nlm.nih.gov/nucleotide/NZ_AP014638.1?report=genbank&log$=nucltop&blast_rank=171&RID=E60JDUH1013","NZ_AP014638.1")
Leptolyngbya boryana NIES-2135 DNA, complete genome	Leptolyngbya boryana NIES-2135	650	1943	1	0.0	89.77	6255463	=HYPERLINK("https://www.ncbi.nlm.nih.gov/nucleotide/NZ_AP018203.1?report=genbank&log$=nucltop&blast_rank=169&RID=E60JDUH1013","NZ_AP018203.1")
Leptolyngbya sp. BL0902 chromosome, complete genome	Leptolyngbya sp. BL0902	657	1945	1	0.0	88.92	4309234	=HYPERLINK("https://www.ncbi.nlm.nih.gov/nucleotide/NZ_CP046155.1?report=genbank&log$=nucltop&blast_rank=110&RID=E60JDUH1013","NZ_CP046155.1")
Leptolyngbya sp. NIES-3755 DNA, complete genome	Leptolyngbya sp. NIES-3755	654	1787	1	0.0	89.49	6244812	=HYPERLINK("https://www.ncbi.nlm.nih.gov/nucleotide/NZ_AP017308.1?report=genbank&log$=nucltop&blast_rank=134&RID=E60JDUH1013","NZ_AP017308.1")
Leptolyngbya sp. O-77 chromosome, complete genome	Leptolyngbya sp. O-77	651	1788	1	0.0	88.35	5480261	=HYPERLINK("https://www.ncbi.nlm.nih.gov/nucleotide/NZ_AP017367.1?report=genbank&log$=nucltop&blast_rank=162&RID=E60JDUH1013","NZ_AP017367.1")
Leptolyngbya sp. PCC 7376, complete sequence	Leptolyngbya sp. PCC 7376	666	1978	1	0.0	92.90	5125950	=HYPERLINK("https://www.ncbi.nlm.nih.gov/nucleotide/NC_019683.1?report=genbank&log$=nucltop&blast_rank=83&RID=E60JDUH1013","NC_019683.1")
Limnospira fusiformis SAG 85.79 chromosome, complete genome	Limnospira fusiformis SAG 85.79	651	2174	1	0.0	89.49	6423694	=HYPERLINK("https://www.ncbi.nlm.nih.gov/nucleotide/NZ_CP051185.1?report=genbank&log$=nucltop&blast_rank=164&RID=E60JDUH1013","NZ_CP051185.1")
Microcoleus sp. PCC 7113, complete sequence	Microcoleus sp. PCC 7113	666	2130	1	0.0	91.76	7470429	=HYPERLINK("https://www.ncbi.nlm.nih.gov/nucleotide/NC_019738.1?report=genbank&log$=nucltop&blast_rank=80&RID=E60JDUH1013","NC_019738.1")
Microcystis aeruginosa FD4 chromosome, complete genome	Microcystis aeruginosa FD4	681	1966	1	0.0	95.74	5449501	=HYPERLINK("https://www.ncbi.nlm.nih.gov/nucleotide/NZ_CP046973.1?report=genbank&log$=nucltop&blast_rank=15&RID=E60JDUH1013","NZ_CP046973.1")
Microcystis aeruginosa NIES-2481 chromosome, complete genome	Microcystis aeruginosa NIES-2481	681	2124	1	0.0	95.74	4293006	=HYPERLINK("https://www.ncbi.nlm.nih.gov/nucleotide/NZ_CP012375.1?report=genbank&log$=nucltop&blast_rank=17&RID=E60JDUH1013","NZ_CP012375.1")
Microcystis aeruginosa NIES-2549 chromosome, complete genome	Microcystis aeruginosa NIES-2549	681	2124	1	0.0	95.74	4294213	=HYPERLINK("https://www.ncbi.nlm.nih.gov/nucleotide/NZ_CP011304.1?report=genbank&log$=nucltop&blast_rank=13&RID=E60JDUH1013","NZ_CP011304.1")
Microcystis aeruginosa NIES-298 chromosome, complete genome	Microcystis aeruginosa NIES-298	681	1972	1	0.0	95.74	4997809	=HYPERLINK("https://www.ncbi.nlm.nih.gov/nucleotide/NZ_CP046058.1?report=genbank&log$=nucltop&blast_rank=14&RID=E60JDUH1013","NZ_CP046058.1")
Microcystis aeruginosa NIES-843, complete sequence	Microcystis aeruginosa NIES-843	682	2129	1	0.0	95.74	5842795	=HYPERLINK("https://www.ncbi.nlm.nih.gov/nucleotide/NC_010296.1?report=genbank&log$=nucltop&blast_rank=12&RID=E60JDUH1013","NC_010296.1")
Microcystis aeruginosa PCC 7806SL, complete genome	Microcystis aeruginosa PCC 7806SL	681	1819	1	0.0	95.74	5139339	=HYPERLINK("https://www.ncbi.nlm.nih.gov/nucleotide/NZ_CP020771.1?report=genbank&log$=nucltop&blast_rank=18&RID=E60JDUH1013","NZ_CP020771.1")
Microcystis panniformis FACHB-1757 chromosome, complete genome	Microcystis panniformis FACHB-1757	681	2127	1	0.0	95.74	5686839	=HYPERLINK("https://www.ncbi.nlm.nih.gov/nucleotide/NZ_CP011339.1?report=genbank&log$=nucltop&blast_rank=19&RID=E60JDUH1013","NZ_CP011339.1")
Microcystis sp. MC19 chromosome, complete genome	Microcystis sp. MC19	681	1972	1	0.0	95.74	5020243	=HYPERLINK("https://www.ncbi.nlm.nih.gov/nucleotide/NZ_CP020664.1?report=genbank&log$=nucltop&blast_rank=16&RID=E60JDUH1013","NZ_CP020664.1")
Microcystis viridis NIES-102 chromosome, complete genome	Microcystis viridis NIES-102	682	2268	1	0.0	95.74	5874197	=HYPERLINK("https://www.ncbi.nlm.nih.gov/nucleotide/NZ_AP019314.1?report=genbank&log$=nucltop&blast_rank=11&RID=E60JDUH1013","NZ_AP019314.1")
Moorea producens PAL-8-15-08-1 chromosome, complete genome	Moorea producens PAL-8-15-08-1	666	2354	1	0.0	91.19	9673108	=HYPERLINK("https://www.ncbi.nlm.nih.gov/nucleotide/NZ_CP017599.1?report=genbank&log$=nucltop&blast_rank=84&RID=E60JDUH1013","NZ_CP017599.1")
Nodularia spumigena UHCC 0039 chromosome, complete genome	Nodularia spumigena UHCC 0039	660	1963	1	0.0	91.50	5294286	=HYPERLINK("https://www.ncbi.nlm.nih.gov/nucleotide/NZ_CP020114.1?report=genbank&log$=nucltop&blast_rank=96&RID=E60JDUH1013","NZ_CP020114.1")
'Nostoc azollae' 0708, complete sequence	'Nostoc azollae' 0708	667	1799	1	0.0	93.18	5354700	=HYPERLINK("https://www.ncbi.nlm.nih.gov/nucleotide/NC_014248.1?report=genbank&log$=nucltop&blast_rank=78&RID=E60JDUH1013","NC_014248.1")
Nostoc edaphicum CCNP1411 chromosome, complete genome	Nostoc edaphicum CCNP1411	672	2669	1	0.0	92.90	7733505	=HYPERLINK("https://www.ncbi.nlm.nih.gov/nucleotide/NZ_CP054698.1?report=genbank&log$=nucltop&blast_rank=41&RID=E60JDUH1013","NZ_CP054698.1")
Nostoc flagelliforme CCNUN1 chromosome, complete genome	Nostoc flagelliforme CCNUN1	671	2284	1	0.0	92.61	8363872	=HYPERLINK("https://www.ncbi.nlm.nih.gov/nucleotide/NZ_CP024785.1?report=genbank&log$=nucltop&blast_rank=60&RID=E60JDUH1013","NZ_CP024785.1")
Nostoc punctiforme PCC 73102, complete sequence	Nostoc punctiforme PCC 73102	671	2146	1	0.0	92.61	8234322	=HYPERLINK("https://www.ncbi.nlm.nih.gov/nucleotide/NC_010628.1?report=genbank&log$=nucltop&blast_rank=61&RID=E60JDUH1013","NC_010628.1")
Nostoc sp. ATCC 53789 chromosome, complete genome	Nostoc sp. ATCC 53789	671	2120	1	0.0	92.61	7340101	=HYPERLINK("https://www.ncbi.nlm.nih.gov/nucleotide/NZ_CP046703.1?report=genbank&log$=nucltop&blast_rank=57&RID=E60JDUH1013","NZ_CP046703.1")
Nostoc sp. C052 chromosome, complete genome	Nostoc sp. C052	672	2245	1	0.0	92.90	7828336	=HYPERLINK("https://www.ncbi.nlm.nih.gov/nucleotide/NZ_CP040272.1?report=genbank&log$=nucltop&blast_rank=42&RID=E60JDUH1013","NZ_CP040272.1")
Nostoc sp. C057 chromosome, complete genome	Nostoc sp. C057	671	2120	1	0.0	92.61	7495445	=HYPERLINK("https://www.ncbi.nlm.nih.gov/nucleotide/NZ_CP040281.1?report=genbank&log$=nucltop&blast_rank=58&RID=E60JDUH1013","NZ_CP040281.1")
Nostoc sp. CENA543 chromosome, complete genome	Nostoc sp. CENA543	664	2113	1	0.0	91.76	6990729	=HYPERLINK("https://www.ncbi.nlm.nih.gov/nucleotide/NZ_CP023278.1?report=genbank&log$=nucltop&blast_rank=88&RID=E60JDUH1013","NZ_CP023278.1")
Nostoc sp. HK-01 DNA, complete genome	Nostoc sp. HK-01	672	1979	1	0.0	92.33	6494018	=HYPERLINK("https://www.ncbi.nlm.nih.gov/nucleotide/AP018318.1?report=genbank&log$=nucltop&blast_rank=47&RID=E60JDUH1013","AP018318.1")
Nostoc sp. 'Lobaria pulmonaria (5183) cyanobiont' strain 5183 chromosome, complete genome	Nostoc sp. 'Lobaria pulmonaria (5183) cyanobiont'	672	1944	1	0.0	92.61	7061466	=HYPERLINK("https://www.ncbi.nlm.nih.gov/nucleotide/NZ_CP026692.1?report=genbank&log$=nucltop&blast_rank=43&RID=E60JDUH1013","NZ_CP026692.1")
Nostoc sp. NIES-3756 chromosome, complete genome	Nostoc sp. NIES-3756	666	2128	1	0.0	92.33	6463965	=HYPERLINK("https://www.ncbi.nlm.nih.gov/nucleotide/NZ_AP017295.1?report=genbank&log$=nucltop&blast_rank=82&RID=E60JDUH1013","NZ_AP017295.1")
Nostoc sp. PCC 7107, complete sequence	Nostoc sp. PCC 7107	672	1821	1	0.0	92.33	6329823	=HYPERLINK("https://www.ncbi.nlm.nih.gov/nucleotide/NC_019676.1?report=genbank&log$=nucltop&blast_rank=45&RID=E60JDUH1013","NC_019676.1")
Nostoc sp. PCC 7120 = FACHB-418, complete sequence	Nostoc sp. PCC 7120 = FACHB-418	673	2128	1	0.0	93.18	6413771	=HYPERLINK("https://www.ncbi.nlm.nih.gov/nucleotide/NC_003272.1?report=genbank&log$=nucltop&blast_rank=38&RID=E60JDUH1013","NC_003272.1")
Nostoc sp. PCC 7524, complete sequence	Nostoc sp. PCC 7524	668	2132	1	0.0	92.33	6635030	=HYPERLINK("https://www.ncbi.nlm.nih.gov/nucleotide/NC_019684.1?report=genbank&log$=nucltop&blast_rank=75&RID=E60JDUH1013","NC_019684.1")
Nostoc sp. 'Peltigera membranacea cyanobiont' N6 chromosome, complete genome	Nostoc sp. 'Peltigera membranacea cyanobiont' N6	671	1975	1	0.0	92.61	8214648	=HYPERLINK("https://www.ncbi.nlm.nih.gov/nucleotide/NZ_CP026681.1?report=genbank&log$=nucltop&blast_rank=50&RID=E60JDUH1013","NZ_CP026681.1")
Nostoc sp. TCL240-02 chromosome, complete genome	Nostoc sp. TCL240-02	671	2123	1	0.0	92.61	7887247	=HYPERLINK("https://www.ncbi.nlm.nih.gov/nucleotide/NZ_CP040094.1?report=genbank&log$=nucltop&blast_rank=59&RID=E60JDUH1013","NZ_CP040094.1")
Nostoc sp. TCL26-01 chromosome, complete genome	Nostoc sp. TCL26-01	666	2266	1	0.0	92.05	6765102	=HYPERLINK("https://www.ncbi.nlm.nih.gov/nucleotide/NZ_CP040297.1?report=genbank&log$=nucltop&blast_rank=79&RID=E60JDUH1013","NZ_CP040297.1")
Nostoc sp. UHCC 0702 chromosome, complete genome	Nostoc sp. UHCC 0702	669	2458	1	0.0	92.61	8587404	=HYPERLINK("https://www.ncbi.nlm.nih.gov/nucleotide/NZ_CP071065.1?report=genbank&log$=nucltop&blast_rank=73&RID=E60JDUH1013","NZ_CP071065.1")
Nostoc sphaeroides CCNUC1 chromosome Gxm1, complete sequence	Nostoc sphaeroides CCNUC1	671	2076	1	0.0	92.33	6481972	=HYPERLINK("https://www.ncbi.nlm.nih.gov/nucleotide/NZ_CP045226.1?report=genbank&log$=nucltop&blast_rank=62&RID=E60JDUH1013","NZ_CP045226.1")
Nostoc sphaeroides strain Kutzing En chromosome, complete genome	Nostoc sphaeroides	671	2091	1	0.0	92.33	6531820	=HYPERLINK("https://www.ncbi.nlm.nih.gov/nucleotide/NZ_CP031941.1?report=genbank&log$=nucltop&blast_rank=63&RID=E60JDUH1013","NZ_CP031941.1")
Nostocales cyanobacterium HT-58-2, complete genome	Nostocales cyanobacterium HT-58-2	670	2284	1	0.0	92.90	7846907	=HYPERLINK("https://www.ncbi.nlm.nih.gov/nucleotide/NZ_CP019636.1?report=genbank&log$=nucltop&blast_rank=66&RID=E60JDUH1013","NZ_CP019636.1")
Oscillatoria acuminata PCC 6304, complete sequence	Oscillatoria acuminata PCC 6304	654	2049	1	0.0	90.06	7689443	=HYPERLINK("https://www.ncbi.nlm.nih.gov/nucleotide/NC_019693.1?report=genbank&log$=nucltop&blast_rank=131&RID=E60JDUH1013","NC_019693.1")
Oscillatoria nigro-viridis PCC 7112, complete sequence	Oscillatoria nigro-viridis PCC 7112	654	2583	1	0.0	90.06	7479014	=HYPERLINK("https://www.ncbi.nlm.nih.gov/nucleotide/NC_019729.1?report=genbank&log$=nucltop&blast_rank=143&RID=E60JDUH1013","NC_019729.1")
Oxynema sp. AP17 chromosome, complete genome	Oxynema sp. AP17	657	2121	1	0.0	89.77	6357750	=HYPERLINK("https://www.ncbi.nlm.nih.gov/nucleotide/NZ_CP051167.1?report=genbank&log$=nucltop&blast_rank=109&RID=E60JDUH1013","NZ_CP051167.1")
Planktothrix agardhii NIES-204 DNA, complete genome	Planktothrix agardhii NIES-204	655	1596	1	0.0	90.91	4780238	=HYPERLINK("https://www.ncbi.nlm.nih.gov/nucleotide/AP017991.1?report=genbank&log$=nucltop&blast_rank=116&RID=E60JDUH1013","AP017991.1")
Pleurocapsa sp. PCC 7327, complete sequence	Pleurocapsa sp. PCC 7327	675	2996	1	0.0	92.33	4986817	=HYPERLINK("https://www.ncbi.nlm.nih.gov/nucleotide/NC_019689.1?report=genbank&log$=nucltop&blast_rank=30&RID=E60JDUH1013","NC_019689.1")
Prochloraceae cyanobacterium LD05 chromosome, complete genome	Prochloraceae cyanobacterium LD05	671	1841	1	0.0	92.33	3839796	=HYPERLINK("https://www.ncbi.nlm.nih.gov/nucleotide/CP073341.1?report=genbank&log$=nucltop&blast_rank=64&RID=E60JDUH1013","CP073341.1")
Prochlorococcus marinus str. AS9601, complete sequence	Prochlorococcus marinus str. AS9601	611	950	1	0.0	82.73	1669886	=HYPERLINK("https://www.ncbi.nlm.nih.gov/nucleotide/NC_008816.1?report=genbank&log$=nucltop&blast_rank=191&RID=E60JDUH1013","NC_008816.1")
Prochlorococcus marinus str. MIT 9215, complete sequence	Prochlorococcus marinus str. MIT 9215	610	926	1	0.0	82.45	1738790	=HYPERLINK("https://www.ncbi.nlm.nih.gov/nucleotide/NC_009840.1?report=genbank&log$=nucltop&blast_rank=193&RID=E60JDUH1013","NC_009840.1")
Prochlorococcus marinus str. MIT 9301, complete sequence	Prochlorococcus marinus str. MIT 9301	611	780	1	0.0	82.73	1641879	=HYPERLINK("https://www.ncbi.nlm.nih.gov/nucleotide/NC_009091.1?report=genbank&log$=nucltop&blast_rank=190&RID=E60JDUH1013","NC_009091.1")
Prochlorococcus marinus str. MIT 9303, complete genome	Prochlorococcus marinus str. MIT 9303	624	934	1	0.0	84.94	2682675	=HYPERLINK("https://www.ncbi.nlm.nih.gov/nucleotide/NC_008820.1?report=genbank&log$=nucltop&blast_rank=185&RID=E60JDUH1013","NC_008820.1")
Prochlorococcus marinus str. MIT 9312, complete sequence	Prochlorococcus marinus str. MIT 9312	612	949	1	0.0	82.73	1709204	=HYPERLINK("https://www.ncbi.nlm.nih.gov/nucleotide/NC_007577.1?report=genbank&log$=nucltop&blast_rank=188&RID=E60JDUH1013","NC_007577.1")
Prochlorococcus marinus str. MIT 9313, complete sequence	Prochlorococcus marinus str. MIT 9313	624	937	1	0.0	84.94	2410873	=HYPERLINK("https://www.ncbi.nlm.nih.gov/nucleotide/NC_005071.1?report=genbank&log$=nucltop&blast_rank=184&RID=E60JDUH1013","NC_005071.1")
Prochlorococcus marinus str. MIT 9515, complete sequence	Prochlorococcus marinus str. MIT 9515	611	948	1	0.0	82.73	1704176	=HYPERLINK("https://www.ncbi.nlm.nih.gov/nucleotide/NC_008817.1?report=genbank&log$=nucltop&blast_rank=192&RID=E60JDUH1013","NC_008817.1")
Prochlorococcus marinus str. NATL1A, complete sequence	Prochlorococcus marinus str. NATL1A	609	1114	1	0.0	82.73	1864731	=HYPERLINK("https://www.ncbi.nlm.nih.gov/nucleotide/NC_008819.1?report=genbank&log$=nucltop&blast_rank=194&RID=E60JDUH1013","NC_008819.1")
Prochlorococcus marinus str. NATL2A, complete sequence	Prochlorococcus marinus str. NATL2A	609	1113	1	0.0	82.73	1842899	=HYPERLINK("https://www.ncbi.nlm.nih.gov/nucleotide/NC_007335.2?report=genbank&log$=nucltop&blast_rank=196&RID=E60JDUH1013","NC_007335.2")
Prochlorococcus marinus subsp. marinus str. CCMP1375, complete sequence	Prochlorococcus marinus subsp. marinus str. CCMP1375	604	776	1	0.0	81.89	1751080	=HYPERLINK("https://www.ncbi.nlm.nih.gov/nucleotide/NC_005042.1?report=genbank&log$=nucltop&blast_rank=198&RID=E60JDUH1013","NC_005042.1")
Prochlorococcus marinus subsp. pastoris str. CCMP1986, complete sequence	Prochlorococcus marinus subsp. pastoris str. CCMP1986	613	781	1	0.0	83.01	1657990	=HYPERLINK("https://www.ncbi.nlm.nih.gov/nucleotide/NC_005072.1?report=genbank&log$=nucltop&blast_rank=187&RID=E60JDUH1013","NC_005072.1")
Prochlorococcus sp. MIT 0604 chromosome, complete genome	Prochlorococcus sp. MIT 0604	611	780	1	0.0	82.73	1780061	=HYPERLINK("https://www.ncbi.nlm.nih.gov/nucleotide/NZ_CP007753.1?report=genbank&log$=nucltop&blast_rank=189&RID=E60JDUH1013","NZ_CP007753.1")
Prochlorococcus sp. MIT 0801 chromosome, complete genome	Prochlorococcus sp. MIT 0801	609	1113	1	0.0	82.73	1929203	=HYPERLINK("https://www.ncbi.nlm.nih.gov/nucleotide/NZ_CP007754.1?report=genbank&log$=nucltop&blast_rank=195&RID=E60JDUH1013","NZ_CP007754.1")
Pseudanabaena sp. ABRG5-3 chromosome, complete genome	Pseudanabaena sp. ABRG5-3	633	1145	1	0.0	88.17	4796642	=HYPERLINK("https://www.ncbi.nlm.nih.gov/nucleotide/NZ_AP017560.1?report=genbank&log$=nucltop&blast_rank=182&RID=E60JDUH1013","NZ_AP017560.1")
Pseudanabaena sp. PCC 7367, complete sequence	Pseudanabaena sp. PCC 7367	630	976	1	0.0	86.97	4557046	=HYPERLINK("https://www.ncbi.nlm.nih.gov/nucleotide/NC_019701.1?report=genbank&log$=nucltop&blast_rank=183&RID=E60JDUH1013","NC_019701.1")
Rippkaea orientalis PCC 8801, complete sequence	Rippkaea orientalis PCC 8801	674	1961	1	0.0	92.61	4679413	=HYPERLINK("https://www.ncbi.nlm.nih.gov/nucleotide/NC_011726.1?report=genbank&log$=nucltop&blast_rank=32&RID=E60JDUH1013","NC_011726.1")
Rippkaea orientalis PCC 8802, complete sequence	Rippkaea orientalis PCC 8802	674	1961	1	0.0	92.61	4669813	=HYPERLINK("https://www.ncbi.nlm.nih.gov/nucleotide/NC_013161.1?report=genbank&log$=nucltop&blast_rank=31&RID=E60JDUH1013","NC_013161.1")
Rivularia sp. PCC 7116, complete sequence	Rivularia sp. PCC 7116	667	2287	1	0.0	91.48	8698463	=HYPERLINK("https://www.ncbi.nlm.nih.gov/nucleotide/NC_019678.1?report=genbank&log$=nucltop&blast_rank=76&RID=E60JDUH1013","NC_019678.1")
Stanieria cyanosphaera PCC 7437, complete sequence	Stanieria cyanosphaera PCC 7437	664	1813	1	0.0	91.19	5041209	=HYPERLINK("https://www.ncbi.nlm.nih.gov/nucleotide/NC_019748.1?report=genbank&log$=nucltop&blast_rank=90&RID=E60JDUH1013","NC_019748.1")
Stanieria sp. NIES-3757 DNA, complete genome	Stanieria sp. NIES-3757	661	2272	1	0.0	90.91	5319768	=HYPERLINK("https://www.ncbi.nlm.nih.gov/nucleotide/NZ_AP017375.1?report=genbank&log$=nucltop&blast_rank=94&RID=E60JDUH1013","NZ_AP017375.1")
Synechococcus elongatus PCC 6301, complete sequence	Synechococcus elongatus PCC 6301	676	1836	1	0.0	92.90	2696255	=HYPERLINK("https://www.ncbi.nlm.nih.gov/nucleotide/NC_006576.1?report=genbank&log$=nucltop&blast_rank=27&RID=E60JDUH1013","NC_006576.1")
Synechococcus elongatus PCC 7942 = FACHB-805, complete sequence	Synechococcus elongatus PCC 7942 = FACHB-805	676	1841	1	0.0	92.90	2695903	=HYPERLINK("https://www.ncbi.nlm.nih.gov/nucleotide/NC_007604.1?report=genbank&log$=nucltop&blast_rank=26&RID=E60JDUH1013","NC_007604.1")
Synechococcus elongatus UTEX 3055 chromosome, complete genome	Synechococcus elongatus UTEX 3055	676	1841	1	0.0	92.90	2767524	=HYPERLINK("https://www.ncbi.nlm.nih.gov/nucleotide/NZ_CP033061.1?report=genbank&log$=nucltop&blast_rank=25&RID=E60JDUH1013","NZ_CP033061.1")
Synechococcus lividus PCC 6715 chromosome, complete genome	Synechococcus lividus PCC 6715	658	1628	1	0.0	87.78	2659739	=HYPERLINK("https://www.ncbi.nlm.nih.gov/nucleotide/NZ_CP018092.1?report=genbank&log$=nucltop&blast_rank=106&RID=E60JDUH1013","NZ_CP018092.1")
Synechococcus sp. A15-127 chromosome, complete genome	Synechococcus sp. A15-127	654	1759	1	0.0	89.77	2543463	=HYPERLINK("https://www.ncbi.nlm.nih.gov/nucleotide/NZ_CP047948.1?report=genbank&log$=nucltop&blast_rank=125&RID=E60JDUH1013","NZ_CP047948.1")
Synechococcus sp. A15-24 chromosome, complete genome	Synechococcus sp. A15-24	653	1749	1	0.0	89.49	2305373	=HYPERLINK("https://www.ncbi.nlm.nih.gov/nucleotide/NZ_CP047960.1?report=genbank&log$=nucltop&blast_rank=148&RID=E60JDUH1013","NZ_CP047960.1")
Synechococcus sp. A15-28 chromosome, complete genome	Synechococcus sp. A15-28	653	1749	1	0.0	89.49	2341586	=HYPERLINK("https://www.ncbi.nlm.nih.gov/nucleotide/NZ_CP047931.1?report=genbank&log$=nucltop&blast_rank=146&RID=E60JDUH1013","NZ_CP047931.1")
Synechococcus sp. A15-44 chromosome, complete genome	Synechococcus sp. A15-44	656	1752	1	0.0	89.49	2621965	=HYPERLINK("https://www.ncbi.nlm.nih.gov/nucleotide/NZ_CP047938.1?report=genbank&log$=nucltop&blast_rank=112&RID=E60JDUH1013","NZ_CP047938.1")
Synechococcus sp. A15-60 chromosome, complete genome	Synechococcus sp. A15-60	655	1771	1	0.0	89.77	2543402	=HYPERLINK("https://www.ncbi.nlm.nih.gov/nucleotide/NZ_CP047933.1?report=genbank&log$=nucltop&blast_rank=117&RID=E60JDUH1013","NZ_CP047933.1")
Synechococcus sp. A15-62 chromosome, complete genome	Synechococcus sp. A15-62	652	1905	1	0.0	89.49	2294140	=HYPERLINK("https://www.ncbi.nlm.nih.gov/nucleotide/NZ_CP047950.1?report=genbank&log$=nucltop&blast_rank=158&RID=E60JDUH1013","NZ_CP047950.1")
Synechococcus sp. A18-25c chromosome, complete genome	Synechococcus sp. A18-25c	655	1771	1	0.0	89.77	2511360	=HYPERLINK("https://www.ncbi.nlm.nih.gov/nucleotide/NZ_CP047957.1?report=genbank&log$=nucltop&blast_rank=118&RID=E60JDUH1013","NZ_CP047957.1")
Synechococcus sp. A18-40 chromosome, complete genome	Synechococcus sp. A18-40	653	1749	1	0.0	89.49	2401547	=HYPERLINK("https://www.ncbi.nlm.nih.gov/nucleotide/NZ_CP047956.1?report=genbank&log$=nucltop&blast_rank=147&RID=E60JDUH1013","NZ_CP047956.1")
Synechococcus sp. A18-46.1 chromosome, complete genome	Synechococcus sp. A18-46.1	653	1890	1	0.0	89.49	2471770	=HYPERLINK("https://www.ncbi.nlm.nih.gov/nucleotide/NZ_CP047955.1?report=genbank&log$=nucltop&blast_rank=149&RID=E60JDUH1013","NZ_CP047955.1")
Synechococcus sp. BIOS-U3-1 chromosome, complete genome	Synechococcus sp. BIOS-U3-1	654	2054	1	0.0	89.77	2710834	=HYPERLINK("https://www.ncbi.nlm.nih.gov/nucleotide/NZ_CP047936.1?report=genbank&log$=nucltop&blast_rank=139&RID=E60JDUH1013","NZ_CP047936.1")
Synechococcus sp. BMK-MC-1 chromosome, complete genome	Synechococcus sp. BMK-MC-1	654	1914	1	0.0	89.77	2601150	=HYPERLINK("https://www.ncbi.nlm.nih.gov/nucleotide/NZ_CP047939.1?report=genbank&log$=nucltop&blast_rank=141&RID=E60JDUH1013","NZ_CP047939.1")
Synechococcus sp. CB0101 chromosome, complete genome	Synechococcus sp. CB0101	654	2240	1	0.0	90.06	2789647	=HYPERLINK("https://www.ncbi.nlm.nih.gov/nucleotide/NZ_CP039373.1?report=genbank&log$=nucltop&blast_rank=130&RID=E60JDUH1013","NZ_CP039373.1")
Synechococcus sp. CBW1002 chromosome, complete genome	Synechococcus sp. CBW1002	654	1915	1	0.0	90.06	3854122	=HYPERLINK("https://www.ncbi.nlm.nih.gov/nucleotide/NZ_CP060398.1?report=genbank&log$=nucltop&blast_rank=133&RID=E60JDUH1013","NZ_CP060398.1")
Synechococcus sp. CBW1004 chromosome, complete genome	Synechococcus sp. CBW1004	665	2093	1	0.0	90.62	3672318	=HYPERLINK("https://www.ncbi.nlm.nih.gov/nucleotide/NZ_CP060397.1?report=genbank&log$=nucltop&blast_rank=86&RID=E60JDUH1013","NZ_CP060397.1")
Synechococcus sp. CBW1006 chromosome, complete genome	Synechococcus sp. CBW1006	653	1916	1	0.0	90.06	3860130	=HYPERLINK("https://www.ncbi.nlm.nih.gov/nucleotide/NZ_CP060396.1?report=genbank&log$=nucltop&blast_rank=151&RID=E60JDUH1013","NZ_CP060396.1")
Synechococcus sp. CBW1107 chromosome, complete genome	Synechococcus sp. CBW1107	659	1927	1	0.0	90.06	3202093	=HYPERLINK("https://www.ncbi.nlm.nih.gov/nucleotide/NZ_CP064908.1?report=genbank&log$=nucltop&blast_rank=105&RID=E60JDUH1013","NZ_CP064908.1")
Synechococcus sp. CBW1108 chromosome, complete genome	Synechococcus sp. CBW1108	655	1908	1	0.0	90.06	3226220	=HYPERLINK("https://www.ncbi.nlm.nih.gov/nucleotide/NZ_CP060395.1?report=genbank&log$=nucltop&blast_rank=119&RID=E60JDUH1013","NZ_CP060395.1")
Synechococcus sp. CC9311, complete sequence	Synechococcus sp. CC9311	649	1902	1	0.0	88.64	2606748	=HYPERLINK("https://www.ncbi.nlm.nih.gov/nucleotide/NC_008319.1?report=genbank&log$=nucltop&blast_rank=174&RID=E60JDUH1013","NC_008319.1")
Synechococcus sp. CC9605, complete sequence	Synechococcus sp. CC9605	652	1748	1	0.0	89.49	2510659	=HYPERLINK("https://www.ncbi.nlm.nih.gov/nucleotide/NC_007516.1?report=genbank&log$=nucltop&blast_rank=160&RID=E60JDUH1013","NC_007516.1")
Synechococcus sp. CC9902, complete sequence	Synechococcus sp. CC9902	654	1899	1	0.0	90.34	2234828	=HYPERLINK("https://www.ncbi.nlm.nih.gov/nucleotide/NC_007513.1?report=genbank&log$=nucltop&blast_rank=135&RID=E60JDUH1013","NC_007513.1")
Synechococcus sp. JA-2-3B'a(2-13), complete sequence	Synechococcus sp. JA-2-3B'a(2-13)	659	1768	1	0.0	89.49	3046682	=HYPERLINK("https://www.ncbi.nlm.nih.gov/nucleotide/NC_007776.1?report=genbank&log$=nucltop&blast_rank=102&RID=E60JDUH1013","NC_007776.1")
Synechococcus sp. JA-3-3Ab, complete sequence	Synechococcus sp. JA-3-3Ab	654	1931	1	0.0	89.20	2932766	=HYPERLINK("https://www.ncbi.nlm.nih.gov/nucleotide/NC_007775.1?report=genbank&log$=nucltop&blast_rank=132&RID=E60JDUH1013","NC_007775.1")
Synechococcus sp. KORDI-100 strain KORDI 100 chromosome, complete genome	Synechococcus sp. KORDI-100	654	1756	1	0.0	89.77	2789000	=HYPERLINK("https://www.ncbi.nlm.nih.gov/nucleotide/NZ_CP006269.1?report=genbank&log$=nucltop&blast_rank=136&RID=E60JDUH1013","NZ_CP006269.1")
Synechococcus sp. KORDI-49 strain KORDI 49 chromosome, complete genome	Synechococcus sp. KORDI-49	654	1762	1	0.0	89.77	2585813	=HYPERLINK("https://www.ncbi.nlm.nih.gov/nucleotide/NZ_CP006270.1?report=genbank&log$=nucltop&blast_rank=123&RID=E60JDUH1013","NZ_CP006270.1")
Synechococcus sp. KORDI-52 strain KORDI 52 chromosome, complete genome	Synechococcus sp. KORDI-52	654	1756	1	0.0	89.77	2572069	=HYPERLINK("https://www.ncbi.nlm.nih.gov/nucleotide/NZ_CP006271.1?report=genbank&log$=nucltop&blast_rank=124&RID=E60JDUH1013","NZ_CP006271.1")
Synechococcus sp. LTW-R chromosome, complete genome	Synechococcus sp. LTW-R	656	2072	1	0.0	90.34	2415533	=HYPERLINK("https://www.ncbi.nlm.nih.gov/nucleotide/NZ_CP059060.1?report=genbank&log$=nucltop&blast_rank=113&RID=E60JDUH1013","NZ_CP059060.1")
Synechococcus sp. M16.1 chromosome, complete genome	Synechococcus sp. M16.1	652	1747	1	0.0	89.49	2112236	=HYPERLINK("https://www.ncbi.nlm.nih.gov/nucleotide/NZ_CP047954.1?report=genbank&log$=nucltop&blast_rank=155&RID=E60JDUH1013","NZ_CP047954.1")
Synechococcus sp. MEDNS5 chromosome, complete genome	Synechococcus sp. MEDNS5	654	1915	1	0.0	89.77	2435869	=HYPERLINK("https://www.ncbi.nlm.nih.gov/nucleotide/NZ_CP047952.1?report=genbank&log$=nucltop&blast_rank=138&RID=E60JDUH1013","NZ_CP047952.1")
Synechococcus sp. Minos11 chromosome, complete genome	Synechococcus sp. Minos11	664	1937	1	0.0	91.19	2284343	=HYPERLINK("https://www.ncbi.nlm.nih.gov/nucleotide/NZ_CP047953.1?report=genbank&log$=nucltop&blast_rank=87&RID=E60JDUH1013","NZ_CP047953.1")
Synechococcus sp. MIT S9220 chromosome, complete genome	Synechococcus sp. MIT S9220	654	1849	1	0.0	89.77	2424175	=HYPERLINK("https://www.ncbi.nlm.nih.gov/nucleotide/NZ_CP047958.1?report=genbank&log$=nucltop&blast_rank=129&RID=E60JDUH1013","NZ_CP047958.1")
Synechococcus sp. MVIR-18-1 chromosome, complete genome	Synechococcus sp. MVIR-18-1	650	2045	1	0.0	88.92	2451974	=HYPERLINK("https://www.ncbi.nlm.nih.gov/nucleotide/NZ_CP047942.1?report=genbank&log$=nucltop&blast_rank=167&RID=E60JDUH1013","NZ_CP047942.1")
Synechococcus sp. NIES-970 DNA, complete genome	Synechococcus sp. NIES-970	672	1660	1	0.0	93.75	2836539	=HYPERLINK("https://www.ncbi.nlm.nih.gov/nucleotide/NZ_AP017959.1?report=genbank&log$=nucltop&blast_rank=44&RID=E60JDUH1013","NZ_AP017959.1")
Synechococcus sp. NOUM97013 chromosome, complete genome	Synechococcus sp. NOUM97013	654	1769	1	0.0	89.77	2552712	=HYPERLINK("https://www.ncbi.nlm.nih.gov/nucleotide/NZ_CP047941.1?report=genbank&log$=nucltop&blast_rank=140&RID=E60JDUH1013","NZ_CP047941.1")
Synechococcus sp. PCC 6312, complete sequence	Synechococcus sp. PCC 6312	661	1643	1	0.0	89.49	3697276	=HYPERLINK("https://www.ncbi.nlm.nih.gov/nucleotide/NC_019680.1?report=genbank&log$=nucltop&blast_rank=93&RID=E60JDUH1013","NC_019680.1")
Synechococcus sp. PCC 7002, complete sequence	Synechococcus sp. PCC 7002	673	1826	1	0.0	93.75	3008047	=HYPERLINK("https://www.ncbi.nlm.nih.gov/nucleotide/NC_010475.1?report=genbank&log$=nucltop&blast_rank=37&RID=E60JDUH1013","NC_010475.1")
Synechococcus sp. PCC 7003 chromosome, complete genome	Synechococcus sp. PCC 7003	673	1826	1	0.0	93.75	3057091	=HYPERLINK("https://www.ncbi.nlm.nih.gov/nucleotide/NZ_CP016474.1?report=genbank&log$=nucltop&blast_rank=35&RID=E60JDUH1013","NZ_CP016474.1")
Synechococcus sp. PCC 7117 chromosome, complete genome	Synechococcus sp. PCC 7117	673	1824	1	0.0	93.75	3087720	=HYPERLINK("https://www.ncbi.nlm.nih.gov/nucleotide/NZ_CP016477.1?report=genbank&log$=nucltop&blast_rank=36&RID=E60JDUH1013","NZ_CP016477.1")
Synechococcus sp. PCC 73109 chromosome, complete genome	Synechococcus sp. PCC 73109	673	1823	1	0.0	93.75	3025472	=HYPERLINK("https://www.ncbi.nlm.nih.gov/nucleotide/NZ_CP013998.1?report=genbank&log$=nucltop&blast_rank=33&RID=E60JDUH1013","NZ_CP013998.1")
Synechococcus sp. PCC 7502, complete sequence	Synechococcus sp. PCC 7502	647	986	1	0.0	90.08	3510253	=HYPERLINK("https://www.ncbi.nlm.nih.gov/nucleotide/NC_019702.1?report=genbank&log$=nucltop&blast_rank=176&RID=E60JDUH1013","NC_019702.1")
Synechococcus sp. PCC 8807 chromosome, complete genome	Synechococcus sp. PCC 8807	673	1824	1	0.0	93.75	3059495	=HYPERLINK("https://www.ncbi.nlm.nih.gov/nucleotide/NZ_CP016483.1?report=genbank&log$=nucltop&blast_rank=34&RID=E60JDUH1013","NZ_CP016483.1")
Synechococcus sp. PROS-7-1 chromosome, complete genome	Synechococcus sp. PROS-7-1	654	1915	1	0.0	89.77	2565218	=HYPERLINK("https://www.ncbi.nlm.nih.gov/nucleotide/NZ_CP047945.1?report=genbank&log$=nucltop&blast_rank=137&RID=E60JDUH1013","NZ_CP047945.1")
Synechococcus sp. PROS-9-1 chromosome, complete genome	Synechococcus sp. PROS-9-1	650	1900	1	0.0	88.92	2273940	=HYPERLINK("https://www.ncbi.nlm.nih.gov/nucleotide/NZ_CP047961.1?report=genbank&log$=nucltop&blast_rank=166&RID=E60JDUH1013","NZ_CP047961.1")
Synechococcus sp. PROS-U-1 chromosome, complete genome	Synechococcus sp. PROS-U-1	652	1897	1	0.0	89.49	2576003	=HYPERLINK("https://www.ncbi.nlm.nih.gov/nucleotide/NZ_CP047951.1?report=genbank&log$=nucltop&blast_rank=154&RID=E60JDUH1013","NZ_CP047951.1")
Synechococcus sp. RCC307 genomic DNA sequence	Synechococcus sp. RCC307	664	1937	1	0.0	91.19	2224914	=HYPERLINK("https://www.ncbi.nlm.nih.gov/nucleotide/NC_009482.1?report=genbank&log$=nucltop&blast_rank=89&RID=E60JDUH1013","NC_009482.1")
Synechococcus sp. ROS8604 chromosome, complete genome	Synechococcus sp. ROS8604	648	2334	1	0.0	88.92	2876904	=HYPERLINK("https://www.ncbi.nlm.nih.gov/nucleotide/NZ_CP047946.1?report=genbank&log$=nucltop&blast_rank=175&RID=E60JDUH1013","NZ_CP047946.1")
Synechococcus sp. RS9902 chromosome, complete genome	Synechococcus sp. RS9902	652	1748	1	0.0	89.49	2481217	=HYPERLINK("https://www.ncbi.nlm.nih.gov/nucleotide/NZ_CP047949.1?report=genbank&log$=nucltop&blast_rank=156&RID=E60JDUH1013","NZ_CP047949.1")
Synechococcus sp. RS9907 chromosome, complete genome	Synechococcus sp. RS9907	653	1890	1	0.0	89.49	2581635	=HYPERLINK("https://www.ncbi.nlm.nih.gov/nucleotide/NZ_CP047944.1?report=genbank&log$=nucltop&blast_rank=150&RID=E60JDUH1013","NZ_CP047944.1")
Synechococcus sp. RS9909 chromosome, complete genome	Synechococcus sp. RS9909	655	1938	1	0.0	90.06	2603169	=HYPERLINK("https://www.ncbi.nlm.nih.gov/nucleotide/NZ_CP047943.1?report=genbank&log$=nucltop&blast_rank=120&RID=E60JDUH1013","NZ_CP047943.1")
Synechococcus sp. RSCCF101 chromosome, complete genome	Synechococcus sp. RSCCF101	654	1894	1	0.0	89.77	2984853	=HYPERLINK("https://www.ncbi.nlm.nih.gov/nucleotide/NZ_CP035632.1?report=genbank&log$=nucltop&blast_rank=142&RID=E60JDUH1013","NZ_CP035632.1")
Synechococcus sp. SYN20 chromosome, complete genome	Synechococcus sp. SYN20	650	2045	1	0.0	88.92	2728628	=HYPERLINK("https://www.ncbi.nlm.nih.gov/nucleotide/NZ_CP047959.1?report=genbank&log$=nucltop&blast_rank=168&RID=E60JDUH1013","NZ_CP047959.1")
Synechococcus sp. SynAce01, complete genome	Synechococcus sp. SynAce01	411	1775	1	8e-179	91.67	2750634	=HYPERLINK("https://www.ncbi.nlm.nih.gov/nucleotide/NZ_CP018091.1?report=genbank&log$=nucltop&blast_rank=200&RID=E60JDUH1013","NZ_CP018091.1")
Synechococcus sp. TAK9802 chromosome, complete genome	Synechococcus sp. TAK9802	652	2043	1	0.0	89.49	2190394	=HYPERLINK("https://www.ncbi.nlm.nih.gov/nucleotide/NZ_CP047937.1?report=genbank&log$=nucltop&blast_rank=157&RID=E60JDUH1013","NZ_CP047937.1")
Synechococcus sp. UTEX 2973 chromosome, complete genome	Synechococcus sp. UTEX 2973	676	1841	1	0.0	92.90	2690418	=HYPERLINK("https://www.ncbi.nlm.nih.gov/nucleotide/NZ_CP006471.1?report=genbank&log$=nucltop&blast_rank=24&RID=E60JDUH1013","NZ_CP006471.1")
Synechococcus sp. WH 8101 chromosome, complete genome	Synechococcus sp. WH 8101	655	1938	1	0.0	90.06	2623023	=HYPERLINK("https://www.ncbi.nlm.nih.gov/nucleotide/NZ_CP047932.1?report=genbank&log$=nucltop&blast_rank=121&RID=E60JDUH1013","NZ_CP047932.1")
Synechococcus sp. WH 8102, complete sequence	Synechococcus sp. WH 8102	653	1889	1	0.0	89.49	2434428	=HYPERLINK("https://www.ncbi.nlm.nih.gov/nucleotide/NC_005070.1?report=genbank&log$=nucltop&blast_rank=153&RID=E60JDUH1013","NC_005070.1")
Synechococcus sp. WH 8103 chromosome 1, complete sequence	Synechococcus sp. WH 8103	653	1749	1	0.0	89.49	2429688	=HYPERLINK("https://www.ncbi.nlm.nih.gov/nucleotide/NZ_LN847356.1?report=genbank&log$=nucltop&blast_rank=152&RID=E60JDUH1013","NZ_LN847356.1")
Synechococcus sp. WH 8109 chromosome, complete genome	Synechococcus sp. WH 8109	652	2032	1	0.0	89.49	2111515	=HYPERLINK("https://www.ncbi.nlm.nih.gov/nucleotide/NZ_CP006882.1?report=genbank&log$=nucltop&blast_rank=159&RID=E60JDUH1013","NZ_CP006882.1")
Synechococcus WH7803 complete genome sequence	Synechococcus sp. WH 7803	654	1913	1	0.0	89.77	2366980	=HYPERLINK("https://www.ncbi.nlm.nih.gov/nucleotide/NC_009481.1?report=genbank&log$=nucltop&blast_rank=145&RID=E60JDUH1013","NC_009481.1")
Synechocystis sp. IPPAS B-1465 chromosome, complete genome	Synechocystis sp. IPPAS B-1465	711	1894	1	0.0	100.00	3574310	=HYPERLINK("https://www.ncbi.nlm.nih.gov/nucleotide/NZ_CP028094.1?report=genbank&log$=nucltop&blast_rank=4&RID=E60JDUH1013","NZ_CP028094.1")
Synechocystis sp. PCC 6714 chromosome, complete genome	Synechocystis sp. PCC 6714	711	1736	1	0.0	100.00	3485441	=HYPERLINK("https://www.ncbi.nlm.nih.gov/nucleotide/NZ_CP007542.1?report=genbank&log$=nucltop&blast_rank=1&RID=E60JDUH1013","NZ_CP007542.1")
Synechocystis sp. PCC 6803 substr. GT-I, complete sequence	Synechocystis sp. PCC 6803 substr. GT-I	711	1894	1	0.0	100.00	3570004	=HYPERLINK("https://www.ncbi.nlm.nih.gov/nucleotide/NC_017038.1?report=genbank&log$=nucltop&blast_rank=8&RID=E60JDUH1013","NC_017038.1")
Synechocystis sp. PCC 6803 substr. PCC-N, complete sequence	Synechocystis sp. PCC 6803 substr. PCC-N	711	1894	1	0.0	100.00	3570103	=HYPERLINK("https://www.ncbi.nlm.nih.gov/nucleotide/NC_017052.1?report=genbank&log$=nucltop&blast_rank=6&RID=E60JDUH1013","NC_017052.1")
Synechocystis sp. PCC 6803 substr. PCC-P, complete sequence	Synechocystis sp. PCC 6803 substr. PCC-P	711	1894	1	0.0	100.00	3570114	=HYPERLINK("https://www.ncbi.nlm.nih.gov/nucleotide/NC_017039.1?report=genbank&log$=nucltop&blast_rank=7&RID=E60JDUH1013","NC_017039.1")
Synechocystis sp. PCC 6803 substrain GT-G, complete genome	Synechocystis sp. PCC 6803	711	1894	1	0.0	100.00	3569196	=HYPERLINK("https://www.ncbi.nlm.nih.gov/nucleotide/NZ_CP012832.1?report=genbank&log$=nucltop&blast_rank=3&RID=E60JDUH1013","NZ_CP012832.1")
Thermoleptolyngbya sp. PKUAC-SCTA183 chromosome, complete genome	Thermoleptolyngbya sp. PKUAC-SCTA183	654	1791	1	0.0	88.92	5525100	=HYPERLINK("https://www.ncbi.nlm.nih.gov/nucleotide/NZ_CP053661.1?report=genbank&log$=nucltop&blast_rank=128&RID=E60JDUH1013","NZ_CP053661.1")
Thermoleptolyngbya sp. PKUAC-SCTB121 chromosome, complete genome	Thermoleptolyngbya sp. PKUAC-SCTB121	654	1793	1	0.0	88.92	5490383	=HYPERLINK("https://www.ncbi.nlm.nih.gov/nucleotide/NZ_CP070366.1?report=genbank&log$=nucltop&blast_rank=126&RID=E60JDUH1013","NZ_CP070366.1")
Thermosynechococcus elongatus BP-1, complete sequence	Thermosynechococcus elongatus BP-1	660	1804	1	0.0	88.35	2593857	=HYPERLINK("https://www.ncbi.nlm.nih.gov/nucleotide/NC_004113.1?report=genbank&log$=nucltop&blast_rank=98&RID=E60JDUH1013","NC_004113.1")
Thermosynechococcus elongatus PKUAC-SCTE542 chromosome, complete genome	Thermosynechococcus elongatus PKUAC-SCTE542	659	1806	1	0.0	88.07	2650294	=HYPERLINK("https://www.ncbi.nlm.nih.gov/nucleotide/NZ_CP032152.1?report=genbank&log$=nucltop&blast_rank=100&RID=E60JDUH1013","NZ_CP032152.1")
Thermosynechococcus sp. CL-1 chromosome, complete genome	Thermosynechococcus sp. CL-1	659	1802	1	0.0	88.35	2647823	=HYPERLINK("https://www.ncbi.nlm.nih.gov/nucleotide/NZ_CP040671.1?report=genbank&log$=nucltop&blast_rank=99&RID=E60JDUH1013","NZ_CP040671.1")
Thermosynechococcus sp. TA-1 chromosome, complete genome	Thermosynechococcus sp. TA-1	660	1803	1	0.0	88.64	2658717	=HYPERLINK("https://www.ncbi.nlm.nih.gov/nucleotide/NZ_CP070960.1?report=genbank&log$=nucltop&blast_rank=95&RID=E60JDUH1013","NZ_CP070960.1")
Thermosynechococcus vulcanus NIES-2134 chromosome, complete genome	Thermosynechococcus vulcanus NIES-2134	660	1804	1	0.0	88.35	2571271	=HYPERLINK("https://www.ncbi.nlm.nih.gov/nucleotide/NZ_AP018202.1?report=genbank&log$=nucltop&blast_rank=97&RID=E60JDUH1013","NZ_AP018202.1")
Tolypothrix sp. PCC 7910 chromosome, complete genome	Tolypothrix sp. PCC 7910	663	1968	1	0.0	91.19	8479123	=HYPERLINK("https://www.ncbi.nlm.nih.gov/nucleotide/NZ_CP050440.1?report=genbank&log$=nucltop&blast_rank=91&RID=E60JDUH1013","NZ_CP050440.1")
Trichodesmium erythraeum IMS101, complete sequence	Trichodesmium erythraeum IMS101	645	1168	1	0.0	88.64	7750108	=HYPERLINK("https://www.ncbi.nlm.nih.gov/nucleotide/NC_008312.1?report=genbank&log$=nucltop&blast_rank=178&RID=E60JDUH1013","NC_008312.1")
Trichormus variabilis 0441 chromosome, complete genome	Trichormus variabilis 0441	669	2269	1	0.0	92.61	6377767	=HYPERLINK("https://www.ncbi.nlm.nih.gov/nucleotide/NZ_CP047242.1?report=genbank&log$=nucltop&blast_rank=68&RID=E60JDUH1013","NZ_CP047242.1")
Trichormus variabilis ATCC 29413, complete sequence	Trichormus variabilis ATCC 29413	669	2269	1	0.0	92.61	6365727	=HYPERLINK("https://www.ncbi.nlm.nih.gov/nucleotide/NC_007413.1?report=genbank&log$=nucltop&blast_rank=69&RID=E60JDUH1013","NC_007413.1")
