# Supplementary material for: Pyruvate:ferredoxin oxidoreductase and low abundant ferredoxins support aerobic photomixotrophic growth in cyanobacteria
Source: eLife. 2022 Feb 9;11:e71339. doi: 10.7554/eLife.71339 (PMC8887894; doi:10.7554/eLife.71339)
Supplement: Figure 1—figure supplement 2—source data 1. [file elife-71339-fig1-figsupp2-data1.xlsx]

## Sheet: Figure 1 - figure supplement 2
Time since start (h)	Sensor 1 (µmol/l) WT	Sensor 2 (µmol/l) PFOR
0.143037	392.081	389.199
0.159731	390.522	388.027
0.176428	390.725	388.009
0.193125	389.534	387.424
0.20982	389.689	387.072
0.226516	388.715	387.069
0.243213	388.404	386.599
0.259909	389.447	386.469
0.276606	388.339	386.038
0.293302	388.487	385.391
0.309999	387.63	385.449
0.326695	388.003	385.467
0.343392	387.263	385.348
0.360088	387.121	385.073
0.376784	387.728	385.071
0.393481	387.165	384.707
0.410177	387.393	384.435
0.426874	387.201	384.535
0.443569	386.612	384.177
0.460266	386.438	383.734
0.476963	386.083	384.068
0.493659	386.194	383.872
0.510356	385.902	383.43
0.527053	385.737	383.498
0.543749	386.165	383.456
0.560445	386.095	383.408
0.577141	385.997	383.184
0.593838	385.559	383.031
0.610535	385.712	382.914
0.627231	385.482	382.548
0.643927	385.883	382.891
0.660623	385.552	382.46
0.677321	385.722	382.793
0.694017	385.289	382.785
0.710713	385.301	382.596
0.72741	385.472	382.257
0.744106	384.824	382.027
0.760802	385.434	382.132
0.777499	385.296	382.061
0.794196	385.615	381.982
0.810892	385.166	382.041
0.827588	385.399	381.817
0.844284	385.091	381.538
0.860981	385.4	381.55
0.877678	384.899	381.254
0.894374	384.792	381.477
0.91107	385.878	381.411
0.927767	384.66	381.461
0.944463	384.788	381.152
0.961159	385.298	381.044
0.977856	385.218	380.878
0.994553	385.553	381.022
1.01125	384.417	381.03
1.02795	384.878	380.903
1.04464	384.307	380.748
1.06134	384.837	380.582
1.07804	384.709	380.654
1.09473	384.412	380.825
1.11143	384.244	380.732
1.12812	384.753	380.271
1.14482	384.048	380.626
1.16152	383.828	380.601
1.17821	384.165	380.313
1.19491	384.638	379.938
1.21161	383.862	380.296
1.2283	383.89	380.039
1.245	383.708	379.877
1.2617	383.529	380.124
1.27839	384.108	379.842
1.29509	383.097	379.49
1.31178	383.6	379.514
1.32848	383.066	379.562
1.34518	383.387	379.675
1.36187	383.235	379.659
1.37857	383.497	379.437
1.39527	382.751	379.281
1.41196	382.945	379.168
1.42866	382.527	378.954
1.44536	383.158	378.876
1.46205	382.829	378.988
1.47875	382.841	378.992
1.49545	382.486	378.932
1.51214	382.567	378.778
1.52884	382.65	378.859
1.54553	382.702	378.894
1.56223	382.388	378.801
1.57893	383.012	378.781
1.59562	382.311	378.602
1.61232	382.269	378.542
1.62902	382.202	378.615
1.64571	382.555	378.546
1.66241	382.237	378.463
1.67911	382.385	378.464
1.6958	382.292	378.534
1.7125	382.292	378.15
1.7292	382.6	378.08
1.74589	381.714	378.335
1.76259	382.465	378.134
1.77929	381.949	378.138
1.79598	381.898	378.15
1.81268	382.245	377.763
1.82937	381.312	378.047
1.84607	381.487	377.976
1.86277	381.927	378.316
1.87947	381.991	378.183
1.89616	381.89	378.281
1.91286	381.269	377.989
1.92955	381.525	378.253
1.94625	381.117	378.341
1.96295	381.669	378.492
1.97964	381.488	378.317
1.99634	381.599	378.063
2.01303	380.911	378.025
2.02973	380.821	377.646
2.04643	381.739	378.754
2.06313	380.972	377.615
2.07982	380.551	377.437
2.09652	381.293	377.408
2.11321	380.436	377.273
2.12991	381.044	377.171
2.14661	381.267	377.295
2.1633	381.166	377.055
2.18	380.445	377
2.1967	380.968	377.119
2.21339	380.379	377.007
2.23009	380.316	376.79
2.24679	380.824	377.113
2.26348	380.492	377.021
2.28018	380.06	376.911
2.29687	380.49	376.983
2.31357	379.961	376.755
2.33027	380.048	376.897
2.34696	379.87	376.533
2.36366	379.625	376.831
2.38036	379.799	376.346
2.39705	379.672	376.938
2.41375	379.329	376.903
2.43045	379.849	376.736
2.44715	379.852	376.515
2.46384	379.713	376.048
2.48054	379.886	376.436
2.49723	379.174	376.567
2.51393	379.986	375.848
2.53063	379.478	376.412
2.54732	379.167	376.654
2.56402	378.943	376.79
2.58071	380.147	376.371
2.59741	379.305	377.084
2.61411	379.263	376.986
2.6308	379.406	376.876
2.6475	380.264	376.413
2.6642	379.664	376.742
2.68089	379.251	376.902
2.69759	379.427	376.662
2.71429	379.464	376.778
2.73098	379.396	376.663
2.74768	379.394	376.505
2.76437	379.37	376.89
2.78107	379.296	376.625
2.79777	379.842	376.309
2.81446	379.135	376.795
2.83116	379.278	376.253
2.84786	379.077	376.668
2.86455	379.086	376.575
2.88125	378.822	376.586
2.89795	379.144	376.621
2.91464	378.912	376.81
2.93134	378.492	376.823
2.94804	379.03	383.496
2.96473	378.644	377.274
2.98143	378.986	376.9
2.99813	379.037	376.884
3.01482	378.328	376.965
3.03152	379.262	376.577
3.04822	378.836	376.801
3.06491	379.43	376.216
3.08161	378.875	376.733
3.0983	378.479	376.755
3.115	378.941	376.661
3.1317	378.467	376.471
3.1484	378.198	376.702
3.16509	378.548	376.618
3.18179	378.893	376.723
3.19848	378.83	376.373
3.21518	378.45	376.248
3.23188	378.075	376.266
3.24857	378.168	375.973
3.26527	378.112	376.33
3.28196	378.162	376.273
3.29866	377.643	376.126
3.31536	377.801	375.878
3.33205	378.674	376.345
3.34875	378.033	376.597
3.36545	378.493	376.882
3.38214	378.708	377.76
3.39884	378.12	384.563
3.41554	377.553	377.08
3.43223	377.554	375.496
3.44893	377.717	375.578
3.46563	377.754	375.779
3.48232	377.584	375.537
3.49902	378.034	375.696
3.51572	377.49	375.455
3.53241	377.515	375.686
3.54911	377.522	375.644
3.5658	377.809	375.405
3.5825	377.552	375.494
3.5992	377.571	375.551
3.61589	377.815	375.328
3.63259	377.468	375.081
3.64929	378.282	375.304
3.66598	377.9	375.005
3.68268	376.958	374.91
3.69938	378.029	375.176
3.71607	377.349	375.002
3.73277	377.209	375.224
3.74947	377.783	374.967
3.76616	376.752	374.98
3.78286	376.987	374.938
3.79955	377.006	374.982
3.81625	377.242	375
3.83295	377.033	374.88
3.84964	377.025	374.88
3.86634	377.619	375.167
3.88304	376.905	374.689
3.89973	376.913	374.708
3.91643	376.814	374.836
3.93313	376.844	374.847
3.94982	376.626	374.831
3.96652	376.545	374.852
3.98322	376.53	374.795
3.99991	377.25	374.487
4.01661	376.846	374.727
4.0333	376.204	374.533
4.05	376.384	374.477
4.0667	376.814	374.267
4.08339	376.342	374.259
4.10009	376.333	374.439
4.11679	376.37	374.292
4.13348	376.678	374.095
4.15018	376.298	374.176
4.16688	376.308	373.93
4.18357	376.256	373.991
4.20027	376.377	374.258
4.21697	375.999	373.847
4.23366	376.141	373.74
4.25036	377.041	374.009
4.26705	376.57	373.964
4.28375	376.78	373.967
4.30045	376.072	373.968
4.31714	376.27	373.82
4.33384	375.856	373.64
4.35054	375.668	373.561
4.36723	375.908	373.888
4.38393	375.633	373.608
4.40063	375.872	373.527
4.41732	375.744	373.481
4.43402	376.79	373.632
4.45072	376.544	373.651
4.46741	376.04	373.473
4.48411	375.57	373.343
4.50081	375.79	373.212
4.5175	375.25	373.338
4.5342	376.148	373.474
4.55089	375.381	373.533
4.56759	376.546	373.505
4.58429	375.678	373.222
4.60098	375.855	373.312
4.61768	375.415	373.419
4.63438	375.543	373.272
4.65107	375.401	373.2
4.66777	376.473	373.61
4.68447	375.458	373.144
4.70116	376.122	373.5
4.71786	376.347	373.549
4.73456	374.99	373.067
4.75125	375.214	373.156
4.76795	375.189	373.046
4.78464	375.365	372.978
4.80134	375.205	372.612
4.81804	376.034	373.146
4.83473	376.084	373.202
4.85143	375.679	373.085
4.86813	375.843	372.915
4.88482	374.808	372.621
4.90152	375.248	372.793
4.91822	375.736	372.846
4.93491	375.061	372.938
4.95161	375.223	372.835
4.96831	375.416	372.972
4.985	375.19	372.931
5.0017	375.965	373.315
5.01839	376.007	373.403
5.03509	375.289	373.388
5.05179	375.181	373.034
5.06848	375.103	373.018
5.08518	376.113	373.407
5.10188	375.82	373.31
5.11857	375.258	373.315
5.13527	375.602	373.232
5.15197	375.112	373.055
5.16866	376.224	373.046
5.18536	375.381	373.074
5.20206	375.79	373.024
5.21875	375.238	372.811
5.23545	374.699	372.745
5.25214	375.486	372.814
5.26884	375.268	372.665
5.28554	375.816	372.897
5.30223	375.213	372.905
5.31893	375.085	372.552
5.33563	375.008	372.734
5.35232	375.417	372.763
5.36902	374.826	372.698
5.38572	375.747	372.957
5.40241	375.004	372.474
5.41911	374.793	372.553
5.43581	374.905	372.564
5.4525	374.821	372.547
5.4692	375.237	372.746
5.48589	375.356	372.654
5.50259	374.671	372.474
5.51929	375.003	372.375
5.53598	374.949	372.563
5.55268	375.137	372.502
5.56938	374.477	372.547
5.58607	375.238	372.629
5.60277	374.636	372.307
5.61947	375.25	372.639
5.63616	375.017	372.363
5.65286	374.468	372.294
5.66956	374.732	372.258
5.68625	375.385	372.379
5.70295	375.287	372.403
5.71965	375.26	372.359
5.73634	374.532	372.24
5.75304	374.791	372.361
5.76973	375.614	372.496
5.78643	374.685	372.223
5.80313	375.367	372.356
5.81982	374.815	372.403
5.83652	374.317	372.322
5.85322	374.274	372.111
5.86991	375.207	372.331
5.88661	374.429	372.394
5.90331	374.861	372.021
5.92	374.815	371.98
5.9367	374.769	372.033
5.9534	374.25	372.189
5.97009	374.54	372.119
5.98679	373.906	372.31
6.00348	374.282	372.064
6.02018	374.335	371.936
6.03688	374.293	372.079
6.05357	374.089	372.074
6.07027	374.035	372.053
6.08697	373.873	372.158
6.10366	373.911	371.976
6.12036	373.729	372.125
6.13706	373.896	372.063
6.15375	374.5	371.98
6.17045	374.095	371.81
6.18715	373.979	372.139
6.20384	373.881	372.009
6.22054	374.391	371.745
6.23724	374.047	372.033
6.25393	373.735	372.08
6.27063	374.098	371.815
6.28732	373.931	371.763
6.30402	373.951	371.876
6.32072	374.238	371.532
6.33741	373.993	371.599
6.35411	374.812	371.522
6.37081	373.508	371.723
6.3875	374.486	371.489
6.4042	373.721	371.748
6.4209	373.722	371.622
6.43759	373.869	371.527
6.45429	373.651	371.549
6.47099	373.954	371.494
6.48768	373.561	371.601
6.50438	373.36	371.532
6.52107	374.079	371.692
6.53777	374.151	371.367
6.55447	374.05	371.688
6.57116	374.127	371.574
6.58786	373.247	371.413
6.60456	373.439	371.509
6.62125	374.179	371.562
6.63795	373.492	371.644
6.65465	373.82	371.796
6.67134	374.38	371.219
6.68804	374.138	371.447
6.70474	373.327	371.389
6.72143	373.627	371.468
6.73813	373.434	371.377
6.75482	373.576	371.281
6.77152	374.299	371.141
6.78822	373.678	371.219
6.80491	373.705	371.31
6.82161	373.108	371.185
6.83831	373.222	371.079
6.855	373.044	371.199
6.8717	373.122	371.186
6.8884	373.402	371.251
6.90509	373.662	371.122
6.92179	373.815	370.895
6.93849	372.954	371.305
6.95518	373.684	371.475
6.97188	373.474	371.256
6.98857	372.83	371.238
7.00527	373.33	371.255
7.02197	373.207	371.282
7.03866	373.366	371.323
7.05536	372.853	371.424
7.07206	372.933	371.38
7.08875	373.27	371.389
7.10545	372.794	371.123
7.12215	372.764	371.275
7.13884	373.876	371.398
7.15554	373	371.394
7.17224	373.587	371.364
7.18893	372.948	371.43
7.20563	373.599	371.32
7.22232	372.908	371.274
7.23902	372.903	371.353
7.25572	372.923	371.28
7.27241	373.669	371.236
7.28911	373.142	371.34
7.30581	373.491	371.245
7.3225	373.041	371.169
7.3392	373.273	371.176
7.3559	373.288	371.313
7.37259	373.636	371.437
7.38929	373.156	371.505
7.40599	373.859	371.425
7.42268	373.227	371.453
7.43938	373.835	371.48
7.45608	373.647	371.264
7.47277	374.123	371.379
7.48947	373.049	371.075
7.50616	373.338	371.363
7.52286	372.765	371.224
7.53956	373.138	371.428
7.55625	372.804	371.094
7.57295	373.064	371.332
7.58965	372.751	371.427
7.60634	373.04	371.208
7.62304	372.918	371.238
7.63974	373.165	370.964
7.65643	373.524	371.28
7.67313	373.813	371.225
7.68982	373.174	371.056
7.70652	373.474	371.541
7.72322	373.093	371.309
7.73991	373.83	371.502
7.75661	373.199	371.338
7.77331	373.077	371.195
7.79	373.931	371.183
7.8067	373.246	371.063
7.8234	372.906	371.048
7.84009	373.245	370.994
7.85679	372.926	371.09
7.87349	372.959	370.946
7.89018	372.565	371.067
7.90688	373.467	370.888
7.92358	372.542	370.827
7.94027	372.978	370.952
7.95697	372.803	370.93
7.97366	372.664	370.936
7.99036	372.794	370.651
8.00706	373.463	371.046
8.02375	372.618	370.644
8.04045	372.78	370.687
8.05715	373.325	370.905
8.07384	372.604	370.599
8.09054	372.629	370.784
8.10724	373.348	370.688
8.12393	373.483	370.775
8.14063	372.549	370.666
8.15733	372.722	370.613
8.17402	372.663	370.707
8.19072	372.626	370.637
8.20742	372.981	370.777
8.22411	372.345	370.456
8.24081	373.302	370.718
8.2575	372.528	370.554
8.2742	373.055	370.679
8.2909	372.547	370.344
8.3076	372.379	370.306
8.32429	372.368	370.187
8.34099	373.14	370.412
8.35768	372.302	370.348
8.37438	373.108	370.297
8.39108	372.539	370.306
8.40777	372.404	370.069
8.42447	372.973	370.39
8.44116	372.737	370.197
8.45786	372.894	370.169
8.47456	372.671	370.386
8.49125	373.184	370.087
8.50795	372.651	369.993
8.52465	372.43	370.153
8.54134	372.424	369.96
8.55804	372.974	370.236
8.57474	372.643	370.316
8.59143	372.476	369.865
8.60813	372.414	370.227
8.62483	372.676	370.002
8.64152	372.703	370.013
8.65822	372.364	369.997
8.67492	372.352	369.878
8.69162	372.656	370.148
8.70831	372.712	369.587
8.72501	372.821	369.85
8.74171	372.799	369.799
8.7584	372.131	369.796
8.7751	371.944	369.967
8.79179	372.117	369.793
8.80849	372.203	369.74
8.82519	372.418	369.971
8.84188	372.114	369.898
8.85858	372.123	369.471
8.87528	372.161	369.842
8.89197	372.248	369.705
8.90867	372.188	369.818
8.92537	373.144	369.708
8.94206	372.265	369.68
8.95876	372.825	369.849
8.97546	372.215	369.723
8.99215	372.561	369.801
9.00885	372.123	369.61
9.02554	372.282	369.679
9.04224	372.555	369.937
9.05894	372.646	369.833
9.07563	372.563	369.54
9.09233	371.948	369.367
9.10903	372.055	369.559
9.12572	372.258	369.474
9.14242	372.051	369.189
9.15912	372.847	369.672
9.17581	372.123	369.415
9.19251	371.958	369.328
9.20921	372.641	369.595
9.2259	372.092	369.552
9.2426	372.833	369.756
9.25929	371.937	369.4
9.27599	372.482	369.727
9.29269	372.102	369.451
9.30938	372.221	369.578
9.32609	371.998	369.43
9.34278	372.192	369.615
9.35948	372.979	369.881
9.37617	372.718	369.72
9.39287	372.881	369.848
9.40957	372.442	370.015
9.42626	373.095	369.946
9.44296	372.41	369.937
9.45966	372.864	369.818
9.47635	372.269	369.924
9.49305	373.145	370.184
9.50975	372.696	369.997
9.52644	372.734	369.886
9.54314	372.517	370
9.55984	372.793	369.895
9.57653	373.037	370.253
9.59323	372.669	370.121
9.60992	372.878	370.001
9.62662	372.72	370.035
9.64332	372.857	370.15
9.66002	372.573	369.878
9.67671	372.343	369.871
9.69341	372.366	370.289
9.71011	373.074	370.182
9.7268	373.023	370.147
9.7435	372.845	370.332
9.7602	372.573	370.171
9.77689	372.601	370.036
9.79359	372.336	369.826
9.81029	372.499	370.235
9.82698	372.852	369.928
9.84368	372.702	370.232
9.86037	372.911	370.389
9.87707	373.116	370.046
9.89377	372.545	370.042
9.91046	372.265	369.931
9.92716	372.76	370.202
9.94386	372.731	369.684
9.96056	372.35	369.99
9.97725	372.336	369.926
9.99395	372.124	370.008
10.0106	372.377	370.029
10.0273	372.938	370.217
10.044	372.371	370.089
10.0607	371.973	370.088
10.0774	372.267	369.787
10.0941	372.541	369.961
10.1108	372.509	370.142
10.1275	372.398	370.239
10.1442	372.707	370.188
10.1609	372.415	370.191
10.1776	372.532	370.057
10.1943	372.521	369.867
10.211	372.429	369.969
10.2277	372.256	370.062
10.2444	372.469	369.756
10.2611	372.65	369.979
10.2778	372.289	369.943
10.2945	372.816	369.837
10.3112	372.25	369.824
10.3279	373.057	370.049
10.3446	372.549	369.903
10.3613	372.7	369.758
10.378	372.422	369.806
10.3947	372.253	369.856
10.4114	372.303	369.781
10.4281	373.032	369.887
10.4448	372.337	369.975
10.4615	373.004	369.906
10.4781	372.486	369.887
10.4948	373.032	369.826
10.5115	372.814	369.916
10.5282	372.893	370.065
10.5449	372.285	369.59
10.5616	372.488	369.946
10.5783	372.379	369.793
10.595	372.243	369.875
10.6117	372.296	369.617
10.6284	372.487	369.71
10.6451	372.636	369.91
10.6618	373.385	370.034
10.6785	372.584	369.861
10.6952	372.54	369.873
10.7119	372.52	369.753
10.7286	372.368	369.913
10.7453	372.639	370.055
10.762	373.148	370.153
10.7787	372.549	370.023
10.7954	372.222	369.718
10.8121	373.044	370.162
10.8288	372.357	370.114
10.8455	372.486	369.701
10.8622	372.264	370.037
10.8789	372.259	369.857
10.8956	372.958	369.836
10.9123	373.11	369.944
10.929	372.102	369.941
10.9456	372.34	369.847
10.9623	373.245	370.021
10.979	372.459	370.063
10.9957	372.39	370.109
11.0124	372.184	369.778
11.0291	372.521	369.799
11.0458	372.062	369.709
11.0625	372.353	369.786
11.0792	372.137	369.623
11.0959	372.343	369.665
11.1126	372.204	369.75
11.1293	372.252	369.911
11.146	373.219	370.221
11.1627	372.389	370.278
11.1794	372.957	370.243
11.1961	372.845	370.272
11.2128	372.2	370.293
11.2295	372.281	370.36
11.2462	372.978	370.768
11.2629	372.818	370.546
11.2796	373.421	370.709
11.2963	373.33	370.855
11.313	373.399	370.834
11.3297	373.077	370.679
11.3464	372.737	370.676
11.3631	372.687	370.653
11.3798	373.401	370.805
11.3965	372.971	370.864
11.4131	372.719	370.606
11.4298	372.78	370.638
11.4465	373.012	370.837
11.4632	373.608	370.754
11.4799	373.354	370.643
11.4966	373.612	371.067
11.5133	373.491	370.948
11.53	373.822	370.839
11.5467	373.376	370.745
11.5634	372.902	370.982
11.5801	372.713	370.712
11.5968	372.716	370.874
11.6135	373.489	370.815
11.6302	373.102	370.785
11.6469	372.7	370.804
11.6636	373.375	370.899
11.6803	372.999	370.822
11.697	372.775	370.611
11.7137	373.06	370.949
11.7304	373.283	370.845
11.7471	373.149	370.859
11.7638	372.899	370.903
11.7805	373.726	370.942
11.7972	373.287	370.99
11.8139	372.628	370.803
11.8306	372.844	370.769
11.8473	372.755	370.877
11.864	373.192	370.737
11.8807	373.37	370.967
11.8974	373.414	370.875
11.914	373.403	370.904
11.9307	372.862	370.694
11.9474	372.819	370.794
11.9641	372.619	370.772
11.9808	373.155	370.796
11.9975	372.933	370.849
12.0142	372.981	370.709
12.0309	372.851	370.679
12.0476	372.759	370.832
12.0643	373.309	371.006
12.081	373.09	371.006
12.0977	373.048	370.807
12.1144	373.074	370.974
12.1311	373.045	370.853
12.1478	372.742	371.017
12.1645	372.844	371.079
12.1812	372.833	371.033
12.1979	372.812	371.039
12.2146	372.764	370.882
12.2313	373.419	370.881
12.248	372.644	370.735
12.2647	373.374	371.099
12.2814	372.64	371.029
12.2981	372.905	370.801
12.3148	372.997	370.625
12.3315	372.981	370.547
12.3482	372.987	370.934
12.3649	372.794	370.969
12.3815	373.69	371.128
12.3982	373.559	370.869
12.4149	373.067	370.702
12.4316	373.114	370.837
12.4483	372.764	370.953
12.465	373.591	371.061
12.4817	373.444	371.152
12.4984	373.525	370.926
12.5151	372.633	370.74
12.5318	372.814	370.898
12.5485	373.638	371.131
12.5652	372.688	370.637
12.5819	372.808	370.727
12.5986	372.959	370.592
12.6153	372.818	370.849
12.632	372.742	370.596
12.6487	372.546	370.613
12.6654	373.018	370.794
12.6821	372.654	370.265
12.6988	372.781	370.427
12.7155	372.739	370.594
12.7322	373.209	370.437
12.7489	372.634	370.465
12.7656	372.647	370.442
12.7823	373.021	370.392
12.799	372.828	370.738
12.8157	372.742	370.754
12.8324	373.369	370.823
12.849	372.98	370.758
12.8657	372.784	370.888
12.8824	372.882	370.819
12.8991	373.345	370.662
12.9158	372.956	370.473
12.9325	372.986	370.512
12.9492	372.763	370.601
12.9659	372.597	370.744
12.9826	372.553	370.522
12.9993	372.54	370.394
13.016	372.602	370.725
13.0327	372.756	370.757
13.0494	372.631	370.25
13.0661	373.423	370.707
13.0828	372.741	370.556
13.0995	372.847	370.295
13.1162	372.45	370.5
13.1329	372.625	370.488
13.1496	372.631	370.494
13.1663	372.762	370.49
13.183	372.622	370.587
13.1997	372.871	370.66
13.2164	373.107	370.679
13.2331	372.676	370.678
13.2498	372.798	370.54
13.2665	373.042	370.611
13.2832	373.088	370.812
13.2999	373.546	371.025
13.3165	373.401	370.674
13.3332	372.629	370.509
13.3499	373.412	370.731
13.3666	372.778	370.591
13.3833	373.596	370.496
13.4	372.493	370.147
13.4167	372.781	370.526
13.4334	372.939	370.363
13.4501	372.416	370.253
13.4668	372.555	370.475
13.4835	372.77	370.365
13.5002	372.566	370.122
13.5169	373.569	370.303
13.5336	372.841	370.331
13.5503	372.63	370.292
13.567	372.758	370.433
13.5837	372.446	370.286
13.6004	372.636	370.299
13.6171	373.523	370.691
13.6338	373.384	370.548
13.6505	373.141	370.573
13.6672	372.802	370.434
13.6839	372.789	370.589
13.7006	372.652	370.521
13.7173	373.381	370.608
13.734	373.142	370.436
13.7507	372.701	370.233
13.7674	373.244	370.599
13.784	373.551	370.772
13.8007	372.646	370.571
13.8174	373.785	370.768
13.8341	373.127	370.875
13.8508	373.263	370.833
13.8675	372.845	370.646
13.8842	372.792	370.891
13.9009	372.864	370.826
13.9176	372.9	370.948
13.9343	373.528	370.925
13.951	373.131	370.976
13.9677	373.061	371.044
13.9844	373.693	371.115
14.0011	373.362	371.099
14.0178	373.144	371.097
14.0345	373.174	370.905
14.0512	373.851	371.156
14.0679	373.481	370.874
14.0846	373.57	371.045
14.1013	374.243	370.654
14.118	374.019	370.853
14.1347	373.841	371.167
14.1514	373.532	370.956
14.1681	373.12	371.08
14.1848	373.882	371.096
14.2015	373.191	370.961
14.2182	373.403	371.053
14.2349	373.103	370.921
14.2515	373.635	370.985
14.2682	373.22	371.264
14.2849	373.812	371.223
14.3016	373.784	371.111
14.3183	373.337	370.93
14.335	373.882	370.995
14.3517	373.707	371.059
14.3684	373.806	371.104
14.3851	373.153	370.801
14.4018	373.179	370.902
14.4185	373.248	370.819
14.4352	373.369	371.215
14.4519	373.101	371.15
14.4686	373.345	371.069
14.4853	373.572	371.135
14.502	373.382	371.044
14.5187	373.472	371.401
14.5354	373.912	370.84
14.5521	372.854	370.758
14.5688	373.449	370.678
14.5855	373.364	370.998
14.6022	373.191	371.207
14.6189	373.807	371.189
14.6356	373.45	371.016
14.6523	373.575	371.042
14.669	373.406	370.964
14.6857	373.18	371.022
14.7024	373.329	371.225
14.719	373.445	371.101
14.7357	373.659	371.203
14.7524	374.278	371.045
14.7691	373.508	371.272
14.7858	373.705	371.337
14.8025	373.308	371.267
14.8192	373.297	370.97
14.8359	374.063	371.233
14.8526	373.327	371.298
14.8693	374.029	371.297
14.886	373.38	371.164
14.9027	373.268	371.06
14.9194	373.93	371.209
14.9361	373.157	371.108
14.9528	373.565	371.005
14.9695	373.69	370.973
14.9862	374.234	371.06
15.0029	373.266	371.101
15.0196	373.322	371.017
15.0363	374.22	370.936
15.053	373.272	371.273
15.0697	372.965	370.995
15.0864	374.27	370.734
15.1031	373.897	371.281
15.1198	373.831	371.258
15.1365	373.599	371.411
15.1532	374.046	371.162
15.1699	373.515	371.253
15.1866	374.343	371.022
15.2032	373.609	371.144
15.2199	373.614	371.266
15.2366	373.406	371.299
15.2533	373.704	371.452
15.27	374.367	371.162
15.2867	373.658	371.082
15.3034	373.717	371.061
15.3201	373.876	371.216
15.3368	373.959	371.029
15.3535	373.495	371.164
15.3702	373.472	371.097
15.3869	373.787	370.996
15.4036	373.482	371.145
15.4203	374.327	370.778
15.437	373.333	370.896
15.4537	373.306	370.801
15.4704	373.391	370.989
15.4871	373.346	370.908
15.5038	374.064	371.013
15.5205	374.056	371.233
15.5372	373.937	371.135
15.5539	374.268	371.113
15.5706	373.643	371.266
15.5873	373.894	371.182
15.604	373.492	371.083
15.6207	373.57	371.172
15.6374	373.445	371.213
15.6541	373.921	371.248
15.6708	374.147	371.1
15.6875	373.714	371.209
15.7041	374.262	370.764
15.7208	373.493	371.014
15.7375	373.484	370.961
15.7542	374.101	371.151
15.7709	373.66	370.97
15.7876	373.765	371.101
15.8043	373.186	370.848
15.821	374.308	370.759
15.8377	373.922	370.924
15.8544	373.468	370.822
15.8711	374.158	370.793
15.8878	373.741	371.068
15.9045	373.661	370.979
15.9212	374.489	370.586
15.9379	373.836	371
15.9546	373.465	371.102
15.9713	373.812	371.133
15.988	373.822	371.253
16.0047	374.162	371.202
16.0214	374.115	371.365
16.0381	374.059	371.365
16.0548	374.696	371.207
16.0715	374.127	371.312
16.0882	374.443	371.294
16.1049	374.686	371.383
16.1216	374.544	371.427
16.1383	374.195	371.254
16.155	374.49	371.233
16.1716	374.138	371.431
16.1883	374.086	371.404
16.205	374.249	371.179
16.2217	374.261	371.291
16.2384	374.472	371.281
16.2551	374.151	371.537
16.2718	374.352	371.359
16.2885	374.284	371.337
16.3052	374.296	371.449
16.3219	374.344	371.493
16.3386	374.421	371.595
16.3553	374.488	371.482
16.372	374.82	371.5
16.3887	374.803	371.438
16.4054	374.74	371.776
16.4221	374.446	371.552
16.4388	374.44	371.613
16.4555	374.387	371.572
16.4722	374.652	371.442
16.4889	375.042	371.624
16.5056	374.603	371.356
16.5223	374.272	371.574
16.539	375.047	371.49
16.5557	375.142	371.798
16.5724	374.716	371.598
16.5891	374.464	371.663
16.6058	375.328	371.432
16.6225	374.767	371.492
16.6392	374.957	371.494
16.6558	374.396	371.92
16.6725	375.106	371.635
16.6892	374.886	371.658
16.7059	374.524	371.488
16.7226	374.779	371.4
16.7393	374.6	371.406
16.756	374.665	371.721
16.7727	375.176	371.484
16.7894	375.22	371.715
16.8061	375.379	372.02
16.8228	375.236	371.699
16.8395	374.684	371.684
16.8562	374.724	371.643
16.8729	374.692	371.817
16.8896	374.639	371.776
16.9063	375.197	371.521
16.923	375.225	371.551
16.9397	374.562	371.479
16.9564	374.407	371.551
16.9731	374.533	371.387
16.9898	374.51	371.49
17.0065	375.453	371.586
17.0232	374.784	371.358
17.0399	375.216	371.511
17.0566	374.615	371.453
17.0733	374.671	371.325
17.09	375.315	371.43
17.1067	375.112	371.63
17.1234	374.596	371.502
17.14	375.323	371.7
17.1567	375.02	371.532
17.1734	374.339	371.607
17.1901	374.728	371.702
17.2068	375.398	371.583
17.2235	374.808	371.651
17.2402	374.691	371.601
17.2569	374.832	371.699
17.2736	375.489	371.737
17.2903	375.44	371.831
17.307	375.195	371.852
17.3237	374.767	371.757
17.3404	375.462	371.922
17.3571	374.753	371.761
17.3738	375.262	372.006
17.3905	374.51	371.753
17.4072	374.707	371.508
17.4239	375.26	371.6
17.4406	375.138	371.74
17.4573	374.695	371.612
17.474	374.953	371.563
17.4907	374.718	371.577
17.5074	375.232	371.69
17.5241	374.602	371.57
17.5408	374.955	371.72
17.5575	374.815	371.582
17.5742	375.236	371.712
17.5909	375.574	371.806
17.6076	374.938	371.752
17.6243	375.321	371.656
17.6409	374.792	371.809
17.6576	374.985	371.766
17.6743	375.355	371.687
17.691	375.142	371.875
17.7077	375.531	371.852
17.7244	374.884	371.847
17.7411	375.198	371.627
17.7578	374.811	371.611
17.7745	374.689	371.678
17.7912	374.78	371.539
17.8079	374.979	371.749
17.8246	375.038	371.519
17.8413	375.547	371.836
17.858	374.782	371.547
17.8747	374.931	371.859
17.8914	375.371	371.902
17.9081	375.157	371.929
17.9248	375.44	372.252
17.9415	375.593	372.095
17.9582	375.011	371.799
17.9749	375.595	371.852
17.9916	375.668	371.892
18.0083	375.032	371.937
18.025	375.468	371.835
18.0417	375.443	371.939
18.0584	375.01	371.976
18.0751	375.337	371.959
18.0918	375.053	372.05
18.1085	376.058	371.934
18.1252	375.182	371.827
18.1419	375.562	371.661
18.1586	375.799	372.074
18.1752	375.394	371.806
18.1919	375.399	372.035
18.2086	375.171	372.016
18.2253	375.853	371.835
18.242	375.411	372.097
18.2587	375.816	371.954
18.2754	375.514	372.36
18.2921	375.083	371.925
18.3088	375.503	372.212
18.3255	375.139	371.757
18.3422	375.976	371.989
18.3589	375.61	372.17
18.3756	375.73	372.23
18.3923	376.247	372.568
18.409	375.547	372.474
18.4257	375.753	372.391
18.4424	375.667	372.671
18.4591	376.498	372.664
18.4758	376.036	372.399
18.4925	376.232	372.698
18.5092	376.57	373.091
18.5259	376.045	372.753
18.5426	376.069	372.617
18.5593	376.101	372.924
18.576	376.758	373.085
18.5927	376.478	373.297
18.6094	376.042	372.972
18.626	376.155	373.155
18.6427	376.573	373.298
18.6594	376.873	372.971
18.6761	377.044	372.821
18.6928	376.735	373.349
18.7095	376.268	373.373
18.7262	376.52	373.115
18.7429	377.311	373.354
18.7596	376.824	373.333
18.7763	376.343	373.298
18.793	376.549	373.313
18.8097	376.316	373.559
18.8264	376.317	373.284
18.8431	376.282	373.448
18.8598	376.319	373.333
18.8765	376.615	373.485
18.8932	377.038	373.205
18.9099	376.57	373.646
18.9266	376.83	373.027
18.9433	376.709	373.623
18.96	376.293	373.513
18.9767	376.869	373.336
18.9934	377.346	373.538
19.0101	376.8	373.509
19.0268	376.51	373.842
19.0435	376.571	373.755
19.0602	377.271	373.622
19.0769	376.662	373.805
19.0936	376.707	373.683
19.1102	377.21	373.7
19.1269	376.813	373.833
19.1436	377.244	373.658
19.1603	376.841	373.465
19.177	376.285	373.617
19.1937	376.599	373.473
19.2104	376.918	373.363
19.2271	376.833	373.376
19.2438	376.553	373.744
19.2605	376.597	373.492
19.2772	376.548	373.539
19.2939	376.637	373.712
19.3106	376.521	374.022
19.3273	377.434	373.721
19.344	376.983	373.662
19.3607	376.668	373.449
19.3774	376.899	373.951
19.3941	377.105	373.563
19.4108	376.825	373.589
19.4275	377.177	373.474
19.4442	376.644	374.009
19.4609	377.179	373.488
19.4776	376.435	373.93
19.4943	377.263	373.601
19.511	377.318	373.962
19.5277	376.723	373.796
19.5444	376.934	373.64
19.5611	377.327	374.026
19.5778	377.37	373.629
19.5944	377.631	373.847
19.6111	377.894	373.91
19.6278	377.492	373.885
19.6445	376.876	373.914
19.6612	377.002	374.11
19.6779	376.845	373.819
19.6946	377.164	373.803
19.709	377.174	373.666
19.7424	377.306	373.902
19.7757	377.308	373.846
19.8091	377.392	373.894
19.8424	377.944	374.284
19.8757	377.656	374.282
19.9091	378.036	374.583
19.9424	378.945	374.471
19.9757	378.042	374.505
20.0091	378.371	374.919
20.0424	378.062	374.554
20.0757	378.009	374.355
20.1091	378.666	374.347
20.1424	377.939	373.961
20.1758	377.882	373.894
20.2091	377.932	373.644
20.2424	377.727	373.897
20.2758	377.747	373.975
20.3091	377.657	373.784
20.3424	378.126	373.795
20.3758	377.93	374.009
20.4091	378.068	373.794
20.4425	377.947	373.652
20.4758	377.638	373.541
20.5091	377.546	373.417
20.5425	377.641	373.62
20.5758	378.013	373.773
20.6091	377.885	373.913
20.6425	378.401	374.253
20.6758	377.925	373.962
20.7092	378.766	374.14
20.7425	378.827	374.385
20.7758	378.448	374.664
20.8092	378.589	374.962
20.8425	378.683	374.88
20.8758	378.588	375.081
20.9092	378.841	375.133
20.9425	378.817	375.426
20.9758	378.63	374.996
21.0092	378.915	374.706
21.0425	378.968	375.125
21.0759	379.774	374.595
21.1092	379.074	374.829
21.1425	379.368	375.061
21.1759	379.183	375.083
21.2092	379.712	374.773
21.2425	379.639	374.953
21.2759	379.323	375.211
21.3092	379.408	375.142
21.3425	379.482	375.331
21.3759	379.227	375.243
21.4092	379.79	375.238
21.4426	380.286	375.066
21.4759	379.656	375.27
21.5092	379.597	375.483
21.5426	379.508	375.148
21.5759	380.176	375.101
21.6092	379.95	375.206
21.6426	380.181	375.408
21.6759	380.694	375.534
21.7093	379.836	375.358
21.7426	379.688	375.397
21.7759	379.858	375.231
21.8093	379.815	375.577
21.8426	380.892	375.599
21.8759	380.34	375.332
21.9093	380.058	375.742
21.9426	380.537	375.851
21.976	380.543	376.088
22.0093	380.912	375.986
22.0426	381.306	376.252
22.076	380.58	375.787
22.1093	380.474	375.833
22.1426	381.134	376.074
22.176	380.958	376.295
22.2093	380.822	376.215
22.2427	381.217	375.668
22.276	381.315	376.109
22.3093	380.722	376.052
22.3427	380.84	375.623
22.376	381.286	376.111
22.4093	380.912	375.847
22.4427	381.356	376.273
22.476	380.832	376.032
22.5093	380.764	375.907
22.5427	381.718	376.181
22.576	380.871	375.99
22.6094	381.227	376.08
22.6427	381.708	376.167
22.676	381.621	376.013
22.7094	381.143	376.236
22.7427	381.314	376.678
22.776	381.253	376.42
22.8094	381.449	376.731
22.8427	381.205	376.154
22.876	381.246	376.533
22.9094	382.355	376.452
22.9427	381.76	376.927
22.9761	381.993	376.941
23.0094	382.74	377.226
23.0427	382.564	376.89
23.0761	382.289	377.372
23.1094	382.262	377.216
23.1427	382.961	377.447
23.1761	382.367	377.293
23.2094	382.765	377.245
23.2428	382.873	377.242
23.2761	382.57	377.293
23.3094	382.768	377.287
23.3428	382.885	377.531
23.3761	382.671	377.371
23.4094	382.636	377.366
23.4428	383.707	377.652
23.4761	383.673	377.757
23.5094	382.941	377.591
23.5428	383.547	377.977
23.5761	383.203	377.937
23.6095	383.077	377.792
23.6428	382.919	377.909
23.6761	383.833	377.892
23.6871	383.978	377.661
23.7205	383.42	377.971
23.7538	384.142	378.357
23.7871	383.589	378.466
23.8205	384.263	378.539
23.8538	384.246	378.247
23.8871	384.366	378.457
23.9205	384.078	378.038
23.9538	384.109	378.426
23.9871	383.832	378.373
24.0205	383.78	378.405
24.0538	384.779	378.343
24.0872	384.202	378.839
24.1205	384.175	378.93
24.1538	384.057	378.937
24.1872	384.961	378.8
24.2205	384.882	378.93
24.2538	385.02	378.651
24.2872	384.586	378.657
24.3205	384.668	378.999
24.3539	384.575	378.819
24.3872	385.852	378.801
24.4205	384.686	378.778
24.4539	384.544	378.357
24.4872	385.237	378.691
24.5205	385.446	378.683
24.5539	385.128	378.749
24.5872	385.115	378.666
24.6205	385.058	378.698
24.6539	385.354	378.718
24.6872	385.419	378.775
24.7206	385.209	378.865
24.7539	385.481	378.691
24.7872	385.716	378.791
24.8206	385.347	378.918
24.8539	385.839	378.766
24.8872	385.888	379.221
24.9206	385.675	379.14
24.9539	386.02	378.782
24.9873	386.055	378.707
25.0206	385.783	379.005
25.0539	386.104	379.144
25.0873	386.363	379.236
25.1206	386.109	379.211
25.1539	385.997	379.141
25.1873	387.077	379.608
25.2206	386.496	379.473
25.2539	387.218	379.64
25.2873	386.664	379.927
25.3206	387.168	379.939
25.354	387.125	379.808
25.3873	387.158	379.856
25.4206	387.147	379.91
25.454	387.099	380.066
25.4873	387.07	379.994
25.5206	388.033	380.215
25.554	387.196	380.015
25.5873	387.762	380.376
25.6207	387.641	380.766
25.654	388.014	380.183
25.6873	388.5	380.32
25.7207	387.802	380.333
25.754	388.107	379.923
25.7873	388.193	380.104
25.8207	388.154	380.22
25.854	387.887	380.86
25.8874	388.225	380.924
25.9207	388.455	380.571
25.954	388.413	381.048
25.9874	388.192	380.662
26.0207	388.18	380.869
26.054	388.465	380.383
26.0874	389.271	381
26.1207	388.657	380.041
26.154	389.355	381.312
26.1874	389.159	381.432
26.2207	389.449	380.816
26.2541	388.751	380.449
26.2874	389.097	380.826
26.3207	388.858	381.402
26.3541	389.251	380.94
26.3874	389.81	381.423
26.4207	390.02	381.057
26.4541	389.475	381.631
26.4874	389.91	381.092
26.5207	389.617	381.125
26.5541	389.873	380.779
26.5874	389.564	381.491
26.6208	389.724	381.601
26.6541	390.126	381.016
26.6874	390.209	380.826
26.7208	390.289	381.282
26.7541	390.135	381.131
26.7874	390.153	381.476
26.8208	390.505	381.415
26.8541	390.222	380.518
26.8874	390.9	381.874
26.9208	390.532	380.781
26.9541	390.413	381.524
26.9875	390.602	381.427
27.0208	390.952	381.337
27.0541	390.85	381.105
27.0875	390.516	381.639
27.1208	390.414	381.377
27.1542	391.299	381.675
27.1875	391.042	381.922
27.2208	391.706	381.483
27.2542	391.173	381.512
27.2875	392.26	381.497
27.3208	391.892	382.864
27.3542	391.669	382.195
27.3875	392.326	382.859
27.4209	392.143	382.37
27.4542	392.784	382.588
27.4875	392.725	382.775
27.5209	392.676	382.234
27.5542	392.543	382.58
27.5875	392.108	383.218
27.6209	393.221	382.912
27.6542	393.049	383.131
27.6875	392.645	383.413
27.7209	392.999	383.585
27.7542	393.716	383.404
27.7876	393.743	383.98
27.8209	393.056	383.402
27.8542	393.499	384.177
27.8876	393.275	383.463
27.9209	393.542	383.789
27.9542	393.856	384.495
27.9876	393.753	383.988
28.0209	394.483	383.417
28.0543	394.401	384.042
28.0876	394.174	384.062
28.1209	393.948	383.763
28.1543	393.986	383.934
28.1876	394.259	384.506
28.2209	393.808	384.146
28.2543	394.366	383.93
28.2876	393.824	384.017
28.3209	393.914	384.181
28.3543	393.741	383.498
28.3876	394.755	383.918
28.421	394.374	384.59
28.4543	394.653	384.051
28.4876	394.529	383.69
28.521	394.966	384.595
28.5543	395.041	384.376
28.5877	394.723	384.246
28.621	394.602	385.05
28.6543	395.272	384.311
28.6876	395.141	383.961
28.721	395.91	384.458
28.7543	395.384	384.193
28.7877	395.264	384.852
28.821	395.625	384.278
28.8543	395.163	384.619
28.8877	395.908	384.424
28.921	395.211	384.133
28.9543	396.157	383.975
28.9877	395.798	384.863
29.021	396.417	384.822
29.0544	396.332	384.368
29.0877	396.237	384.94
29.121	396.216	384.817
29.1544	396.28	385.053
29.1877	396.487	384.834
29.221	396.84	385.196
29.2544	397.238	385.42
29.2877	397.229	384.893
29.3211	396.862	385.476
29.3544	397.301	385.093
29.3877	396.957	385.33
29.4211	397.646	385.79
29.4544	397.306	385.843
29.4877	397.634	385.401
29.5211	397.762	386.244
29.5544	398.286	385.851
29.5878	397.653	385.84
29.6211	398.316	386.711
29.6544	397.853	386.358
29.6878	397.918	386.123
29.7211	398.105	385.887
29.7544	398.522	386.195
29.7878	398.777	386.591
29.8211	398.729	386.518
29.8544	398.745	386.793
29.8878	386.273	386.095
29.9211	398.787	386.62
29.9545	398.88	386.513
29.9878	398.333	386.811
30.0211	399.395	386.734
30.0545	399.585	386.882
30.0878	399.322	387.265
30.1211	399.175	387.18
30.1545	399.04	386.882
30.1878	399.903	386.708
30.2211	399.518	386.251
30.2545	398.894	387.026
30.2878	399.693	386.156
30.3212	399.679	387.113
30.3545	398.533	387.721
30.3878	399.385	387.285
30.4212	399.633	387.512
30.4545	400.161	386.518
30.4878	400.162	386.909
30.5212	400.097	386.719
30.5545	401.02	386.608
30.5879	400.231	387.375
30.6212	400.542	386.215
30.6545	400.093	387.413
30.6879	400.244	386.698
30.7212	400.673	387.038
30.7545	399.961	386.996
30.7879	400.1	386.773
30.8212	400.335	387.007
30.8546	400.727	387.27
30.8879	400.925	387.681
30.9212	400.348	387.47
30.9546	400.596	387.686
30.9879	400.359	388.17
31.0213	400.327	387.308
31.0546	401.011	387.892
31.0879	401.529	387.393
31.1213	401.366	387.95
31.1546	401.35	387.55
31.1879	401.245	387.939
31.2213	401.724	387.311
31.2546	401.706	387.249
31.2879	401.72	387.786
31.3213	401.129	387.934
31.3546	401.197	388.525
31.388	401.067	387.729
31.4213	401.841	387.853
31.4546	402.336	388.564
31.488	401.478	387.635
31.5213	401.846	389.266
31.5546	402.141	387.826
31.588	402.214	389.154
31.6213	402.067	389.043
31.6547	402.491	388.859
31.688	402.101	388.858
31.7213	402.397	389.613
31.7547	401.884	389.006
31.788	401.888	388.895
31.8213	402.471	389.253
31.8547	402.389	389.372
31.888	403.148	389.38
31.9214	402.765	389.629
31.9547	403.057	389.93
31.988	402.264	389.422
32.0214	402.768	389.84
32.0547	402.404	390.067
32.0881	402.37	390.358
32.1214	402.188	389.884
32.1547	402.872	390.75
32.1881	402.742	389.904
32.2214	403.529	390.156
32.2547	403.26	390.328
32.2881	402.659	389.56
32.3214	402.666	390.234
32.3547	403.253	390.824
32.3881	402.923	389.8
32.4214	403.284	390.208
32.4548	403.497	389.985
32.4881	403.784	390.437
32.5214	403.328	391.057
32.5548	403.617	390.995
32.5881	403.675	390.779
32.6214	403.655	391.002
32.6548	404.245	390.112
32.6881	403.908	390.74
32.7215	403.761	390.938
32.7548	403.385	391.054
32.7881	403.856	391.292
32.8215	403.379	390.322
32.8548	402.948	390.776
32.8881	403.367	390.695
32.9215	403.389	391.211
32.9548	403.963	391.716
32.9881	402.747	391.074
33.0215	403.71	391.256
33.0548	403.662	390.631
33.0882	403.687	390.855
33.1215	403.842	391.666
33.1548	404.013	391.349
33.1882	403.724	392.087
33.2215	403.721	391.313
33.2548	403.87	392.185
33.2882	404.259	390.996
33.3215	403.679	390.548
33.3548	403.547	391.414
33.3882	404.149	391.021
33.4215	404.765	392.398
33.4549	404.358	391.46
33.4882	404.167	391.788
33.5215	404.095	391.284
33.5549	403.999	391.691
33.5882	404.657	392.329
33.6215	404.332	392.674
33.6549	404.691	393.309
33.6882	404.864	393.829
33.7215	404.63	393.013
33.7549	404.034	392.781
33.7882	404.518	393.116
33.8216	404.001	392.925
33.8549	404.004	392.816
33.8882	404.768	392.668
33.9216	404.812	392.902
33.9549	404.28	393.361
33.9883	405.168	392.765
34.0216	404.591	393.963
34.0549	404.417	393.255
34.0883	403.964	394.34
34.1216	404.233	392.81
34.1549	404.021	392.979
34.1883	404.348	393.703
34.2216	404.028	394.33
34.2549	404.747	393.784
34.2883	404.417	393.458
34.3216	403.863	393.537
34.355	403.165	394.065
34.3883	403.901	394.024
34.4216	403.128	393.82
34.455	402.714	393.893
34.4883	403.455	394.395
34.5216	402.576	394.236
34.555	401.795	394.485
34.5883	402.133	394.729
34.6217	401.902	394.664
34.655	401.304	394.088
34.6883	401.251	393.784
34.7217	401.629	395.424
34.755	402.003	395.103
34.7883	401.176	395.161
34.8217	401.799	394.604
34.855	400.992	394.385
34.8883	401.252	395.417
34.9217	400.513	394.854
34.955	401.253	394.417
34.9883	401.828	395.28
35.0217	400.987	394.89
35.055	401.989	395.173
35.0884	401.532	395.508
35.1217	401.452	395.176
35.155	401.131	394.556
35.1884	401.84	394.066
35.2217	401.405	396.176
35.255	401.575	395.364
35.2884	401.757	395.986
35.3217	401.598	396.565
35.3551	401.39	396.215
35.3884	400.931	395.152
35.4217	401.546	395.766
35.4551	402.222	395.128
35.4884	402.379	395.708
35.5217	401.989	395.893
35.5551	401.419	395.561
35.5884	402.246	396.803
35.6217	402.604	396.125
35.6551	402.182	396.751
35.6884	403.174	396.631
35.7218	402.609	396.173
35.7551	402.693	396.343
35.7884	403.595	396.81
35.8218	403.015	396.78
35.8551	403.22	396.384
35.8884	402.373	397.039
35.9218	403.531	397.281
35.9551	403.439	396.231
35.9885	403.233	396.894
36.0218	403.159	397
36.0551	402.975	398.085
36.0885	403.969	396.667
36.1218	403.655	397.042
36.1552	403.394	397.481
36.1885	402.804	396.435
36.2218	403.661	396.975
36.2552	403.954	397.432
36.2885	403.579	396.434
36.3218	403.492	397.085
36.3552	404.608	397.635
36.3885	403.723	397.328
36.4218	403.662	398.041
36.4552	403.354	398.181
36.4885	403.904	398.439
36.5219	404.088	398.459
36.5552	404.189	397.739
36.5885	404.213	398.878
36.6219	403.936	397.452
36.6552	403.938	398.411
36.6885	404.387	398.848
36.7219	404.288	398.754
36.7552	404.989	398.883
36.7885	403.912	398.064
36.8219	404.568	398.537
36.8552	404.75	398.779
36.8886	404.825	399.431
36.9219	404.205	399.003
36.9552	404.563	398.068
36.9886	404.545	398.147
37.0219	404.523	398.173
37.0552	404.298	398.944
37.0886	404.499	399.235
37.1219	404.9	399.157
37.1552	405.308	398.74
37.1886	404.159	398.676
37.2219	404.694	399.255
37.2553	404.427	399.018
37.2886	404.228	399.245
37.3219	405.626	398.687
37.3553	405.778	398.961
37.3886	405.729	398.62
37.4219	405.019	399.872
37.4553	405.662	399.572
37.4886	405.789	399.761
37.522	405.438	399.092
37.5553	405.524	399.786
37.5886	406.125	399.925
37.622	406.121	399.852
37.6553	406.384	399.726
37.6886	405.812	399.547
37.722	405.407	400.819
37.7553	405.176	400.998
37.7887	406.047	398.882
37.822	406.141	398.934
37.8553	406.284	399.712
37.8887	406.351	399.116
37.922	406.191	400.367
37.9553	406.73	399.288
37.9887	406.768	399.412
38.022	406.467	399.467
38.0553	406.237	399.767
38.0887	406.45	400.597
38.122	406.513	399.978
38.1554	407.271	400.18
38.1887	406.305	399.858
38.222	406.684	399.964
38.2554	406.526	400.522
38.2887	406.379	400.09
38.322	406.353	400.453
38.3554	406.578	399.933
38.3887	407.305	401.405
38.422	407.509	401.624
38.4554	406.694	400.843
38.4887	406.767	401.202
38.5221	406.95	401.044
38.5554	406.352	400.997
38.5887	406.862	401.092
38.6221	406.639	401.801
38.6554	407.073	402.524
38.6887	407.045	401.659
38.7221	407.099	399.524
38.7554	406.706	400.898
38.7887	407.117	400.493
38.8221	406.968	400.856
38.8554	407.477	402.002
38.8888	407.431	401.22
38.9221	407.157	400.915
38.9554	407.356	401.675
38.9888	407.657	401.857
39.0221	407.582	402.254
39.0554	406.739	401.547
39.0888	406.773	401.715
39.1221	407.093	401.625
39.1555	407.66	402.564
39.1888	407.43	403.181
39.2221	407.705	402.232
39.2555	407.242	401.784
39.2888	406.837	402.524
39.3221	406.771	402.668
39.3555	407.275	401.669
39.3888	407.744	403.619
39.4221	407.435	403.528
39.4555	408.363	403.744
39.4888	408.051	403.601
39.5222	407.902	402.584
39.5555	408.381	402.288
39.5888	407.371	403.884
39.6222	407.587	403.152
39.6555	407.89	403.098
39.6888	408.607	403.986
39.7222	407.984	403.71
39.7555	407.961	403.858
39.7889	407.479	403.047
39.8222	408.268	403.456
39.8555	407.956	403.594
39.8889	407.873	404.162
39.9222	408.416	403.166
39.9555	408.229	403.504
39.9889	408.337	404.654
40.0222	408.109	403.072
40.0555	407.862	404.1
40.0889	407.94	404.185
40.1222	408.431	404.764
40.1556	408.462	404.084
40.1889	408.678	404.012
40.2222	408.595	404.339
40.2556	408.097	404.255
40.2889	408.1	404.669
40.3223	408.292	405.008
40.3556	407.872	404.21
40.3889	407.957	404.293
40.4223	407.904	404.709
40.4556	408.552	404.061
40.4889	408.427	404.265
40.5223	408.053	405.47
40.5556	408.244	405.796
40.5889	407.991	404.415
40.6223	408.223	405.378
40.6556	408.349	405.319
40.689	408.42	405.546
40.7223	408.995	405.881
40.7556	409.181	405.03
40.789	408.021	405.483
40.8223	408.513	406.354
40.8556	408.143	404.422
40.889	408.218	404.849
40.9223	408.263	405.902
40.9557	408.527	405.664
40.989	408.806	405.99
41.0223	408.159	405.43
41.0557	408.049	405.164
41.089	408.206	405.696
41.1224	408.693	405.226
41.1557	407.837	405.314
41.189	408.328	405.871
41.2224	408.941	405.63
41.2557	408.267	405.877
41.289	408.217	405.246
41.3224	408.7	407.122
41.3557	408.263	406.887
41.3891	408.085	405.883
41.4224	408.854	405.668
41.4557	408.875	406.714
41.4891	408.838	407.485
41.5224	409.523	407.458
41.5558	409.454	406.828
41.5891	408.76	407.547
41.6224	408.692	407.584
41.6558	408.679	407.62
41.6891	409.318	407.046
41.7224	409.107	406.868
41.7558	409.587	409.132
41.7891	409.463	407.945
41.8224	409.602	407.852
41.8558	409.39	407.975
41.8891	409.398	408.413
41.9225	408.942	409.449
41.9558	409.313	409.121
41.9891	409.331	409.492
42.0225	410.05	409.571
42.0558	409.256	408.503
42.0891	409.469	408.276
42.1225	409.877	408.305
42.1558	409.031	408.045
42.1892	409.606	409.351
42.2225	409.065	409.298
42.2558	409.48	409.948
42.2892	409.805	409.284
42.3225	409.839	409.491
42.3558	409.57	408.12
42.3667	408.962	409.284
42.4001	409.099	409.273
42.4334	409.079	409.468
42.4668	409.041	410.338
42.5001	409.255	409.109
42.5334	409.52	410.364
42.5668	410.216	410.896
42.6001	409.691	410.353
42.6334	409.7	410.764
42.6668	409.058	410.504
42.7001	409.504	410.76
42.7335	409.226	410.833
42.7668	409.619	410.556
42.8001	409.395	410.889
42.8335	409.714	410.904
42.8668	409.848	410.55
42.9001	409.722	411.631
42.9335	410.536	411.997
42.9668	410.202	412.757
43.0001	410.422	411.966
43.0335	410.082	411.219
43.0668	408.617	411.95
43.1002	409.116	411.063
43.1335	409.106	411.072
43.1668	410.084	411.209
43.2002	409.632	411.487
43.2335	409.177	410.254
43.2668	409.238	411.084
43.3002	409.625	411.257
43.3335	409.17	411.985
43.3669	408.834	410.96
43.4002	409.455	411.516
43.4335	409.6	412.134
43.4669	410.153	411.935
43.5002	409.901	412.639
43.5336	409.622	413.244
43.5669	409.103	411.523
43.6002	409.715	412.184
43.6336	409.266	412.514
43.6669	409.764	413.269
43.7002	410.718	413.177
43.7336	410.839	413.167
43.7669	409.628	413.905
43.8002	409.571	413.884
43.8336	410.053	412.847
43.8669	409.716	413.412
43.9003	410.499	413.401
43.9336	410.168	414.592
43.9669	409.346	413.544
44.0003	409.554	413.552
44.0336	409.08	412.801
44.0669	410.255	415.257
44.1003	410.038	415.592
44.1336	410.046	415.456
44.1669	410.487	413.211
44.2003	410.102	413.904
44.2336	410.466	415.231
44.267	410.641	414.973
44.3003	410.573	414.613
44.3336	410.177	414.591
44.367	409.912	415.422
44.4003	409.785	414.353
44.4336	409.875	414.79
44.467	409.414	414.639
44.5003	409.811	415.596
44.5337	410.536	416.703
44.567	409.891	415.367
44.6003	410.129	415.564
44.6337	409.866	416.078
44.667	409.136	416.164
44.7003	409.423	414.376
44.7337	408.914	416.414
44.767	409.13	416.399
44.8003	409.418	415.742
44.8337	409.413	415.43
44.867	410.065	417.538
44.9004	409.527	417.771
44.9337	410.054	416.639
44.967	409.72	416.354
45.0004	409.633	415.584
45.0337	409.05	416.023
45.067	409.365	415.829
45.1004	409.316	416.775
45.1337	409.802	416.108
45.167	409.69	415.867
45.2004	409.696	416.287
45.2337	410.22	418.409
45.2671	410.051	416.389
45.3004	410.015	418.511
45.3337	410.166	418.225
45.3671	410.11	417.86
45.4004	410.067	417.135
45.4338	409.572	417.804
45.4671	409.762	419.039
45.5004	410.279	417.178
45.5337	409.039	418.053
45.5671	410.068	417.692
45.6004	409.895	419.139
45.6338	409.953	419.209
45.6671	410.759	419.059
45.7004	410.526	419.616
45.7338	410.477	419.864
45.7671	410.101	419.176
45.8004	410.401	418.488
45.8338	410.052	418.501
45.8671	409.767	419.214
45.9005	410.255	420.024
45.9338	409.879	419.999
45.9671	410.781	420.244
46.0005	410.714	420.114
46.0338	410.306	420.617
46.0671	411.014	419.272
46.1005	410.298	421.932
46.1338	410.361	420.533
46.1672	410.791	421.144
46.2005	410.751	420.978
46.2338	413.186	423.617
46.2672	413.505	426.167
46.3005	412.993	427.341
46.3338	412.921	429.588
46.3672	412.529	430.356
46.4005	412.792	430.265
46.4339	412.161	431.727
46.4672	412.598	432.124
46.5005	412.403	432.125
46.5339	412.017	433.106
46.5672	412.151	432.917
46.5972	412.178	431.809
46.6305	409.971	431.046
46.6639	409.115	428.519
46.6972	408.971	424.826
46.7305	408.674	424.925
46.7639	408.478	424.303
46.7972	408.772	424.392
46.8305	408.182	422.723
46.8639	408.329	421.512
46.8972	408.654	421.886
46.9305	408.195	422.392
46.9639	408.618	422.2
46.9972	408.76	422.969
47.0306	408.13	422.642
47.0639	408.827	422.397
47.0972	408.756	421.358
47.1306	409.357	423.925
47.1639	409.339	424.034
47.1972	410.261	423.961
[truncated: 4,313 more rows]
