# Supplementary material for: Pyruvate:ferredoxin oxidoreductase and low abundant ferredoxins support aerobic photomixotrophic growth in cyanobacteria
Source: eLife. 2022 Feb 9;11:e71339. doi: 10.7554/eLife.71339 (PMC8887894; doi:10.7554/eLife.71339)
Supplement: Figure 1—source data 1. [file elife-71339-fig1-data1.xlsx]

## Sheet: Figure 1A
						1	2	3	4	5	6	7	8	9	10
					WT + glc	0.04	0.084	0.155	1.212	3.01	5.41	5.73	5.7	5.49	5.48
					Δpfor + glc	0.041	0.085	0.159	0.742	2.04	3.8	4.18	3.52	2.85	2.78
					WT	0.04	0.081	0.159	0.287	0.589	0.87	1.38	1.91	2.45	2.85
					Δpfor	0.041	0.083	0.156	0.3	0.563	0.82	1.29	2.06	2.29	2.69
												1	2	3	4	5	6	7	8	9	10
											WT + glc	0	0.0011	0.079	0.098	0.14	0.16	0.088	0.261	0.311	0.256
											Δpfor + glc	0	0.0013	0.054	0.078	0.135	0.234	0.198	0.341	0.256	0.26
											WT	0	0.0003	0.07	0.02	0.08	0.018	0.019	0.13	0.24	0.23
											Δpfor	0	0.0005	0.009	0.05	0.01	0.023	0.09	0.23	0.21	0.47

## Sheet: Figure 1B
					0	6	24	48	72	96	120	168	192	240
				WT + glc	0.0552228	0.0835341	0.100614	0.0761707	0.323783	0.376416	0.386286	0.258413	0.261624	0.321223
				Δpfor + glc	0.0395903	0.0780042	0.165601	0.348784	0.414424	0.445018	0.48279	0.4355	0.299921	0.129418
				WT	0.0390124	0.0683967	0.0574192	0.0663209	0.0585004	0.0476031	0.0399102	0.0414907	0.0891987	0.0469362
				Δpfor	0.0478398	0.0885281	0.054602	0.0450888	0.0614415	0.0393311	0.0455	0.0484153	0.0383001	0.0357134
					0	6	24	48	72	96	120	168	192	240
				WT+G	0.00606138	0.00516705	0.0121929	0.00391464	0.0166087	0.0172921	0.0121429	0.00979342	0.0131881	0.0343883
				Δpfor+G	0.00606138	0.00516705	0.0121929	0.00391464	0.0166087	0.0172921	0.0121429	0.0197934	0.0131881	0.0143883
				WT	0.000906211	0.00539836	0.00349042	0.00606047	0.00270018	0.00254847	0.00279492	0.00134536	0.00889933	0.0031319
				Δpfor	0.00606138	0.00516705	0.0121929	0.00391464	0.0166087	0.0172921	0.0121429	0.00979342	0.0131881	0.0343883
