# Supplementary material for: Pyruvate:ferredoxin oxidoreductase and low abundant ferredoxins support aerobic photomixotrophic growth in cyanobacteria
Source: eLife. 2022 Feb 9;11:e71339. doi: 10.7554/eLife.71339 (PMC8887894; doi:10.7554/eLife.71339)
Supplement: Figure 3—source data 1. [file elife-71339-fig3-data1.xlsx]

## Sheet: Figure 3A
	R2	Repeat 2	WT			fx2/Δfx2+G			Δfx4+G			Δfx3+G			Δfx9+G			Δfx7+G			Δfx7Δfx9+G			Δfx9ΔisiB+G			ΔisiB+G			Δpfor+G
		DAYS	1	2	3	1	2	3	1	2	3	1	2	3	1	2	3	1	2	3	1	2	3	1	2	3	1	2	3	1	2	3
		1	0.061	0.062	0.063	0.062	0.061	0.061	0.059	0.059	0.059	0.056	0.056	0.056	0.061	0.064	0.063	0.061	0.059	0.059	0.061	0.061	0.063	0.06	0.062	0.061	0.058	0.058	0.058	0.055	0.057	0.055
		2	0.235	0.234	0.239	0.238	0.235	0.24	0.277	0.285	0.288	0.235	0.237	0.241	0.163	0.158	0.16	0.235	0.245	0.239	0.155	0.15	0.15	0.161	0.164	0.167	0.22	0.213	0.219	0.143	0.146	0.148
		3	0.946	0.949	0.944	0.806	0.792	0.793	1.136	1.137	1.142	0.937	0.927	0.932	0.575	0.578	0.56	0.969	0.973	0.972	0.556	0.534	0.517	0.708	0.699	0.696	1.129	1.136	1.136	0.684	0.676	0.697
		4	2.91	2.9	2.81	2.1	2.06	2.07	3.78	3.69	3.7	3.49	3.43	3.39	2.2	2.13	2.09	2.99	2.91	2.95	2.12	1.98	1.97	2.42	2.32	2.32	4.1	4.01	3.99	2.9	2.88	2.82
		5	6.56	6.72	6.66	4.48	4.27	4.31	8	8.18	7.59	7.51	7.14	7.35	5.29	5.43	5.18	6.6	6.35	6.4	5	5.15	4.86	5.51	5.41	5.61	6.61	6.11	6.31	6.32	6.24
		6	7.69	7.89	7.56	7.71	7.27	7.42	8.23	8.32	8.42	6.56	6.32	6.52	6.53	6.55	6.59	8	8.16	8.05	6.28	6.44	6.24	5.37	5.55	5.44	7.1	7.27	6.91	4.14	4.09	3.89
		7	7.58	7.64	7.67	7.05	6.99	6.74	8.2	8.35	8.23	5.83	5.59	5.78	6.2	6.19	5.95	7.88	7.97	7.91	6.33	6.31	6.22	5.34	5.23	5.12	4.09	4.34	4.37	3.19	3.14	3.48
		9	7.72	7.51	7.49	7.28	7.32	7.25	8.22	8.02	7.98	5.82	5.53	5.59	5.12	4.87	4.92	8.8	8.73	8.35	5.04	4.7	4.5	4.71	4.44	4.54	3.53	3.4	3.22	2.94	2.87	2.89
		10	7.54	7.48	7.43	7.03	7.11	7.04	8.12	7.58	7.46	5.67	5.42	5.39	4.59	4.39	4.37	8.85	8.74	8.74	4.45	4.03	4.1	4.29	4.05	3.85	3.4	3.2	3.16	2.72	2.65	2.69
				WT	fx2/Δfx2+G	Δfx4+G	Δfx3+G	Δfx9+G	Δfx7+G	Δfx7Δfx9+G	Δfx9ΔisiB+G	ΔisiB+G	Δpfor+G		STDEV	WT	fx2/Δfx2+G	Δfx4+G	Δfx3+G	Δfx9+G	Δfx7+G	Δfx7Δfx9+G	Δfx9ΔisiB+G	ΔisiB+G	Δpfor+G
			1	0.062	0.0613333	0.059	0.056	0.0626667	0.0596667	0.0616667	0.061	0.058	0.0556667		1	0.001	0.00057735	0	0	0.00152753	0.0011547	0.0011547	0.001	0	0.0011547
			2	0.236	0.237667	0.283333	0.237667	0.160333	0.239667	0.151667	0.164	0.217333	0.145667		2	0.00264575	0.00251661	0.00568624	0.00305505	0.00251661	0.00503322	0.00288675	0.003	0.00378594	0.00251661
			3	0.946333	0.797	1.13833	0.932	0.571	0.971333	0.535667	0.701	1.13367	0.685667		3	0.00251661	0.00781025	0.00321455	0.005	0.00964365	0.00208167	0.0195533	0.006245	0.00404145	0.0105987
			4	2.87333	2.07667	3.72333	3.43667	2.14	2.95	2.02333	2.35333	4.03333	2.86667		4	0.0550757	0.0208167	0.0493288	0.0503322	0.0556776	0.04	0.083865	0.057735	0.0585947	0.0416333
			5	6.64667	4.35333	7.92333	7.33333	5.3	6.45	5.00333	5.51	6.34333	6.28		5	0.080829	0.111505	0.302379	0.185562	0.1253	0.132288	0.145029	0.1	0.251661	0.0565685
			6	7.71333	7.46667	8.32333	6.46667	6.55667	8.07	6.32	5.45333	7.09333	4.04		6	0.166233	0.223681	0.0950438	0.128582	0.0305505	0.0818535	0.10583	0.0907377	0.180093	0.132288
			7	7.63	6.92667	8.26	5.73333	6.11333	7.92	6.28667	5.23	4.26667	3.27		7	0.0458258	0.164418	0.0793725	0.126623	0.141539	0.0458258	0.0585947	0.11	0.153731	0.183576
			9	7.57333	7.28333	8.07333	5.64667	4.97	8.62667	4.74667	4.56333	3.38333	2.9		9	0.12741	0.0351188	0.128582	0.15308	0.132288	0.242143	0.273008	0.136504	0.155671	0.0360555
			10	7.48333	7.06	7.72	5.49333	4.45	8.77667	4.19333	4.06333	3.25333	2.68667		10	0.0550757	0.043589	0.351568	0.153731	0.121655	0.0635085	0.225019	0.220303	0.128582	0.0351188
											WT + glc	fx5/Δfx5 + glc	Δfx6 + glc	Δfx9 + glc	Δfx7Δfx8Δfx9 + glc	Δpfor + glc
										1	0.0603333	0.061	0.058	0.0737778	0.0821111	0.0756667
										2	0.0730833	0.0783333	0.0704444	0.0885556	0.0993333	0.0915556
										3	0.220833	0.344556	0.289667	0.222333	0.225222	0.367111
										4	1.355	1.57222	1.46444	1.64111	1.71778	2.61
										5	3.22833	3.45111	3.11889	4.10444	4.46889	5.11667
										6	6.78667	6.36667	5.95556	7.52667	8.53556	7.32444
										7	8.09	7.48444	7.68	6.42667	7.42667	6.84667
										8	7.87	7.68444	7.96222	6.39778	6.44667	6.49556
										9	7.59833	7.73556	8.07778	6.17111	5.52444	5.83333
										10	8.13667	8.54444	8.98667	5.86222	5.11333	5.3
										11	8.31	9.13778	8.78444	5.42222	5.03889	5.11778
										12	8.20917	9.12667	8.86	5.33556	4.81889	4.63333
										stdev	WT	△fx5	△fx6	△fx9	△fx789	△pfor
										1	0.00105409	0.000333333	4.90654e-18	0.00083887	0.00096225	0.001
										2	0.00159571	0.00057735	0.0007698	0.00164429	0.00185592	0.00126198
										3	0.00586578	0.0040734	0.0157162	0.0023094	0.00715179	0.0217622
										4	0.111903	0.0221944	0.0670268	0.073207	0.0250185	0.15836
										5	0.19384	0.0157527	0.313711	0.277796	0.0316813	0.0491031
										6	0.581671	0.133167	0.412329	0.393503	0.310006	0.362052
										7	0.100148	0.277636	0.509117	0.584846	0.513831	0.558729
										8	0.295572	0.45871	0.369163	0.407722	0.740105	0.961665
										9	0.265741	0.24077	0.671229	0.43335	0.740105	0.720123
										10	0.48211	0.440824	0.587689	0.417098	1.10309	0.670257
										11	0.216145	0.262495	0.0754247	0.293434	0.97345	0.600901
										12	0.384046	0.539918	0.866897	0.17718	1.22801	0.698602

## Sheet: Figure 3B
						Growth NADH-GOGAT, Fdx-GOGAT, WT auto- und mixotroph
									autotroph						mixotroph
									A	B	A	B	A	B	A	B	C	A	B	C	A	B	C
									NGO		FGO		WT		NGO			FGO			WT
							2019-01-08	0	0.0585		0.046		0.0525		0.0585			0.0525			0.0545
							2019-01-09	1	0.239	0.2156	0.1845	0.195	0.199	0.223	0.325	0.333	0.3495	0.175	0.1755	0.167		0.32	0.3185
							2019-01-10	2	0.425	0.355	0.32	0.335	0.32	0.375	1.595	1.455	1.535	0.315	0.325	0.285		1.375	1.445
							2019-01-11	3	0.61	0.52	0.49	0.51	0.42	0.56	4.66	3.565	3.165	0.385	0.39	0.375		3.09	3.46
							2019-01-12	4	1.07		0.805	0.84	0.8	1.115				0.71	0.701	0.66
							2019-01-13	5	1.2		0.945	1.03	0.875	1.39	5.9	7.8	7.25	0.945	0.925	0.83	6.05	7.55	6.05
							2019-01-14	6	1.575		1.205	1.415	1.005	2.065	6.9	7.75	6.9	1.34	1.27	1.015	6.4	6.95	7
									auto			mixo
									Δn-gogat	Δf-gogat	WT	Δn-gogat	Δf-gogat	WT
						Average	2019-01-08	0	0.0585	0.046	0.0525	0.0585	0.0525	0.0545
							2019-01-09	1	0.2273	0.18975	0.211	0.335833	0.1725	0.31925
							2019-01-10	2	0.39	0.3275	0.3475	1.52833	0.308333	1.41
							2019-01-11	3	0.565	0.5	0.49	3.79667	0.383333	3.275
							2019-01-12	4	1.07	0.8225	0.9575	5.48	0.690333	4.83
							2019-01-13	5	1.2	0.9875	1.1325	6.98333	0.9	6.55
							2019-01-14	6	1.575	1.31	1.535	7.18333	1.20833	6.78333
								auto				mixo
						Average		WT	Δn-gogat	Δf-gogat		WT + glc	Δn-gogat + glc	Δf-gogat + glc
							1	0.0525	0.0585	0.046	1	0.0545	0.0585	0.0525
							2	0.211	0.2273	0.18975	2	0.31925	0.335833	0.1725
							3	0.3475	0.39	0.3275	3	1.41	1.52833	0.308333
							4	0.49	0.565	0.5	4	3.275	3.79	0.383
							5	0.8575	0.98	0.7225	5	4.83	5.48	0.69
							6	1.1325	1.2	0.9875	6	6.55	6.983	0.9
							7	1.535	1.575	1.31	7	6.783	7.183	1.208
						Maxima:			auto			mixo
									NGO	FGO	WT	NGO+G	FGO+G	WT+G
							2019-01-08	0	0.0585	0.046	0.0525	0.0585	0.0525	0.0545
							2019-01-09	1	0.239	0.195	0.223	0.3495	0.1755	0.32
							2019-01-10	2	0.425	0.335	0.375	1.595	0.325	1.445
							2019-01-11	3	0.61	0.51	0.56	4.66	0.39	3.46
							2019-01-12	4	1.07	0.84	1.115	0	0.71	0
							2019-01-13	5	1.2	1.03	1.39	7.8	0.945	7.55
							2019-01-14	6	1.575	1.415	2.065	7.75	1.34	7
								auto				mixo
								WT	Δn-gogat	Δf-gogat		WT + glc	Δn-gogat + glc	Δf-gogat + glc
						STABW	1	0	0	0	1	0	0	0
							2	0.09	0.07	0.04	2	0.084	0.09	0.05
							3	0.06	0.05	0.06	3	0.093	0.086	0.18
							4	0.095	0.06	0.07	4	0.123	0.52	0.28
							5	0.075	0.08	0.092	5	0.095	0.12	0.26
							6	0.092	0.07	0.082	6	0.48	0.94	0.24
							7	0.085	0.09	0.098	7	0.51	0.97	0.25
						Minima:			auto			mixo
									NGO	FGO	WT	NGO+G	FGO+G	WT+G
							2019-01-08	0	0.0585	0.046	0.0525	0.0585	0.0525	0.0545
							2019-01-09	1	0.2156	0.1845	0.199	0.325	0.167	0.3185
							2019-01-10	2	0.355	0.32	0.32	1.455	0.285	1.375
							2019-01-11	3	0.52	0.49	0.42	3.165	0.375	3.09
							2019-01-12	4	1.07	0.805	0.8	0	0.66	0
							2019-01-13	5	1.2	0.945	0.875	5.9	0.83	6.05
							2019-01-14	6	1.575	1.205	1.005	6.9	1.015	6.4

## Sheet: Figure 3C
	WT	WT+Glc	D1D2	D1D2+Glc	Hk	Hk+Glc	glgP1P2	glgP1P2+Glc	all in µmol e-/l/s
	0.2685	0.3835	0.181482	0.158705	0.2911	0.2535	0.1125	0.3542
	0.2567	0.3647	0.103514	0.132908	0.1987	0.2251	0.1289	0.3261
	0.2221	0.3998	0.136273	0.147767	0.2367	0.2304	0.1094	0.3485
	0.2059	0.3817			0.2611	0.2548
	0.1956	0.3712
