# Supplementary material for: Pyruvate:ferredoxin oxidoreductase and low abundant ferredoxins support aerobic photomixotrophic growth in cyanobacteria
Source: eLife journal article supplement (doi:10.7554/elife.71339), 2022-02-09

Figure 1 - figure supplement 3 - source data – 1

(1) Original files of full, unedited gels

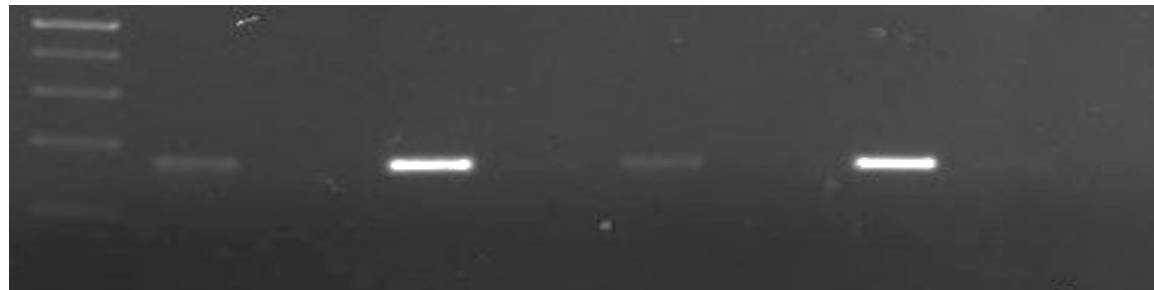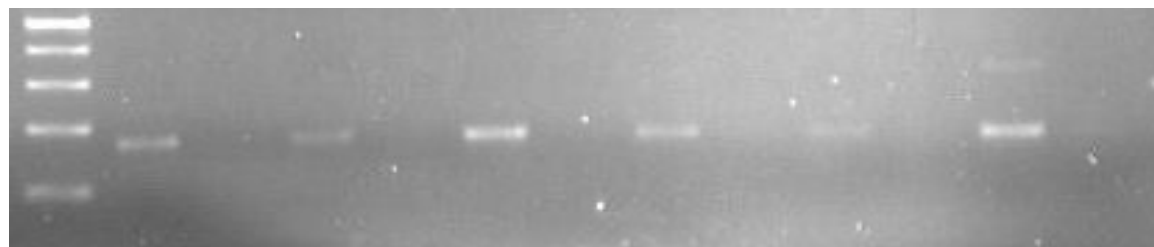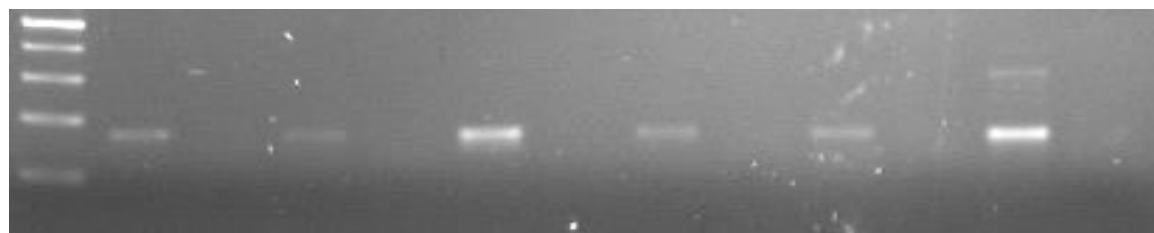

Figure 1 – figure supplement 3 - source data – 2 (2) Original files of full uncropped raw gel with relevant bands clearly labelled

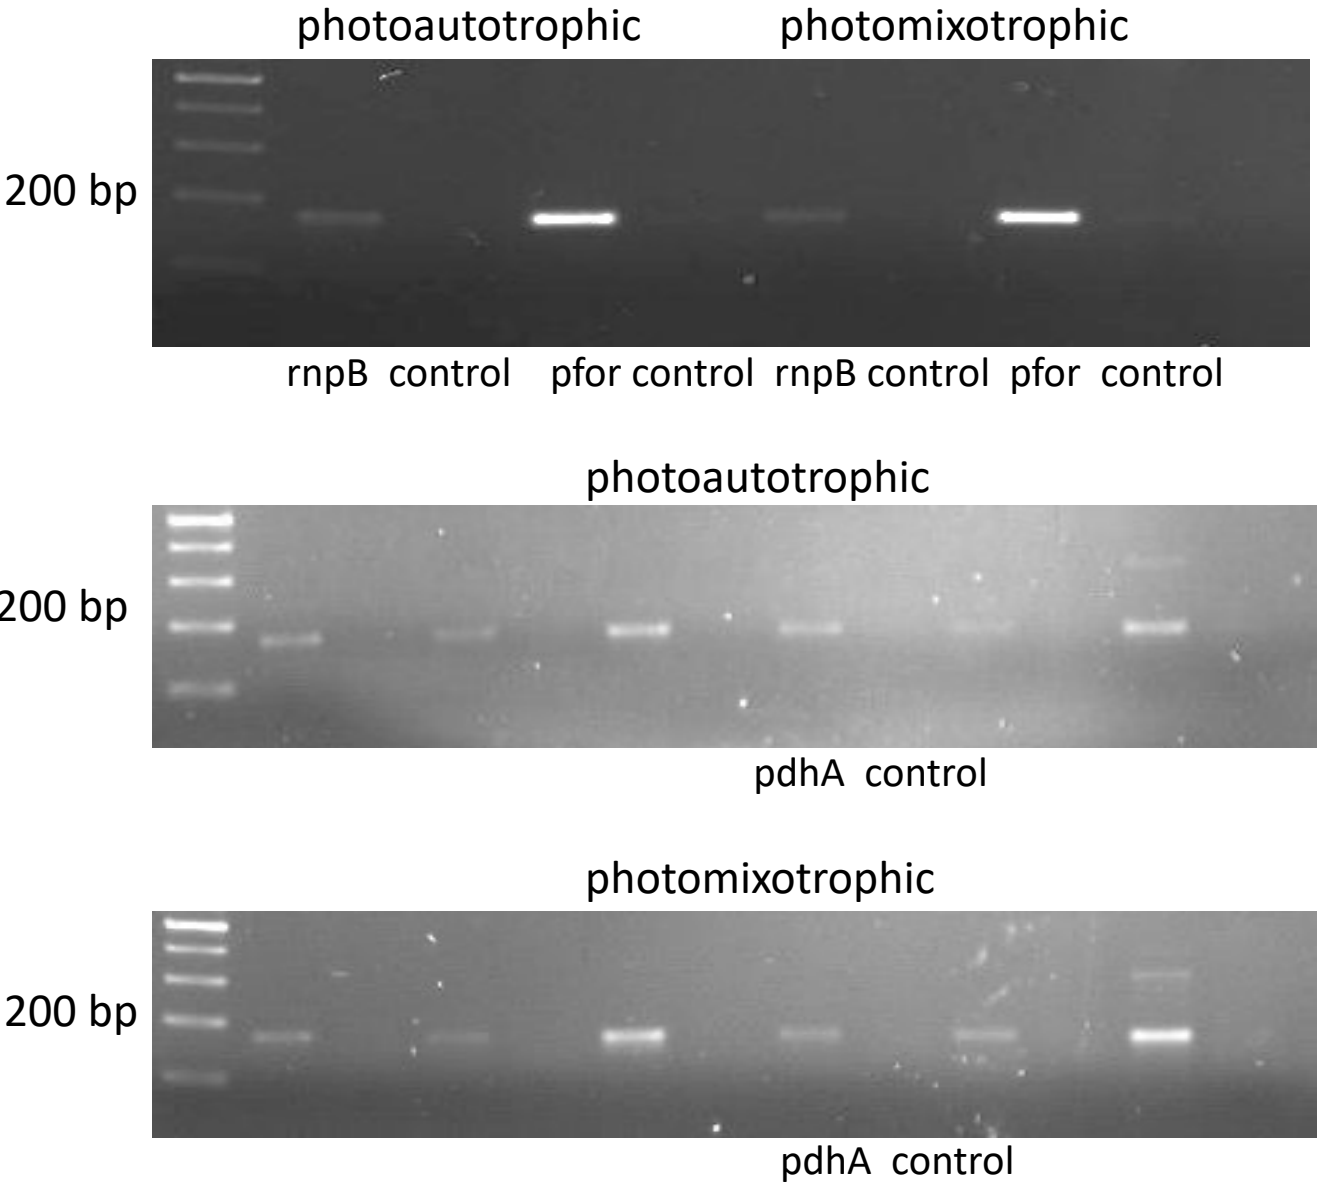

Supplement: supp [file elife-71339-supp-v1.zip]
