# Supplementary material for: Pyruvate:ferredoxin oxidoreductase and low abundant ferredoxins support aerobic photomixotrophic growth in cyanobacteria
Source: eLife journal article supplement (doi:10.7554/elife.71339), 2022-02-09

Figure 1- figure supplement 1

diazotrophic (with N<sub>2</sub>ase)

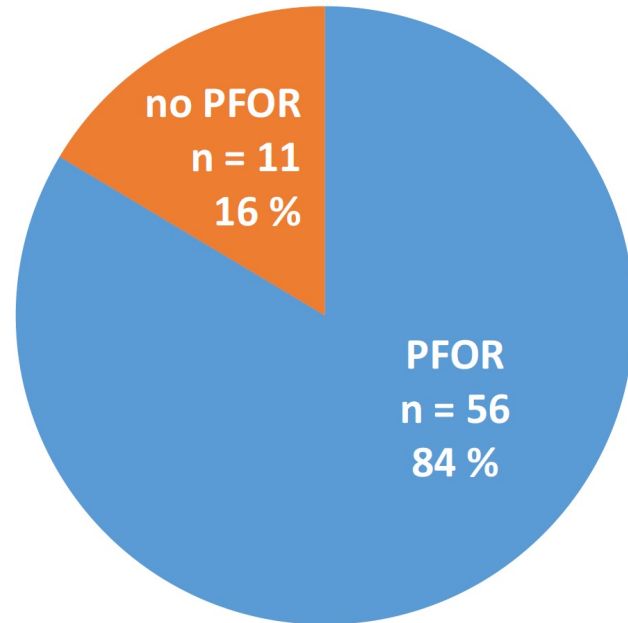

non-diazotrophic (without N<sub>2</sub>ase)

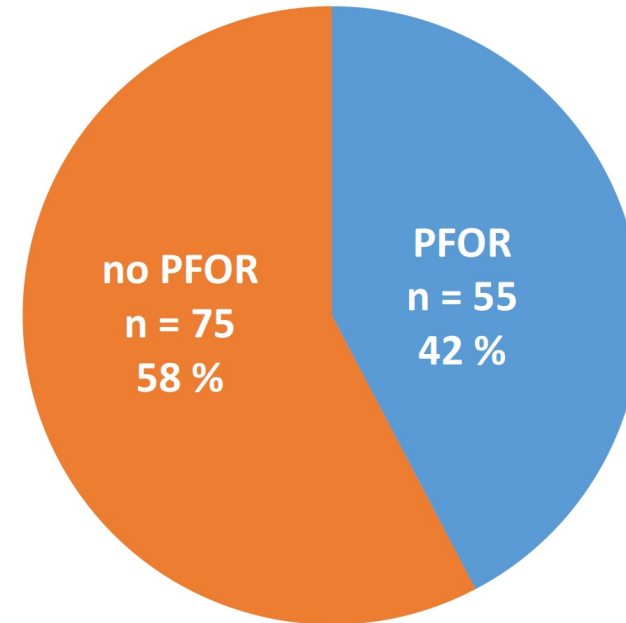

Supplement: supp [file elife-71339-supp-v1.zip]
