# Supplementary material for: Pyruvate:ferredoxin oxidoreductase and low abundant ferredoxins support aerobic photomixotrophic growth in cyanobacteria
Source: eLife journal article supplement (doi:10.7554/elife.71339), 2022-02-09

Figure 2 - figure supplement 2 - source data - 1

(1) Original file of full uncropped raw, unedited gel

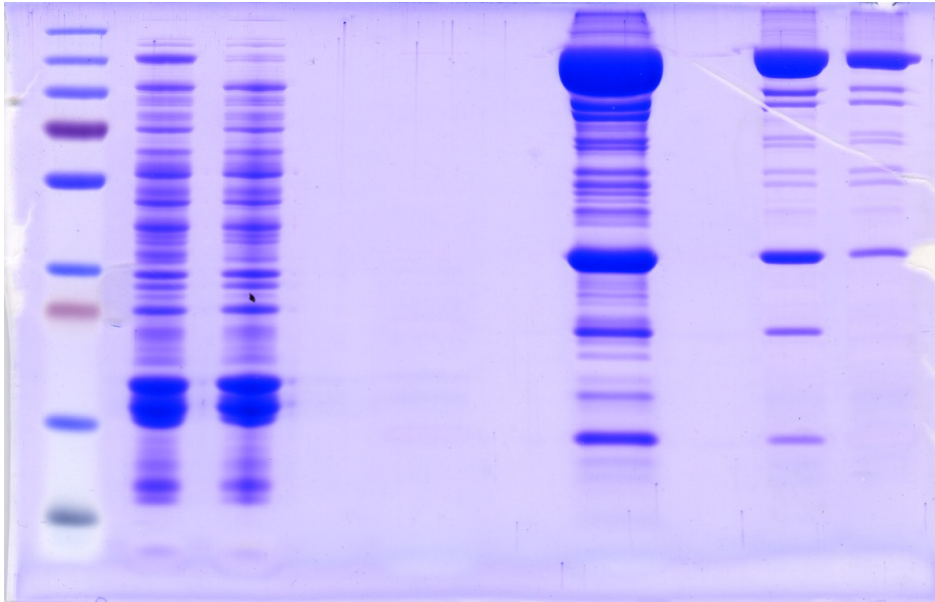

Figure 2 - figure supplement 2 - source data - 2

(2) Original file of full uncropped raw gel with relevant bands clearly labelled

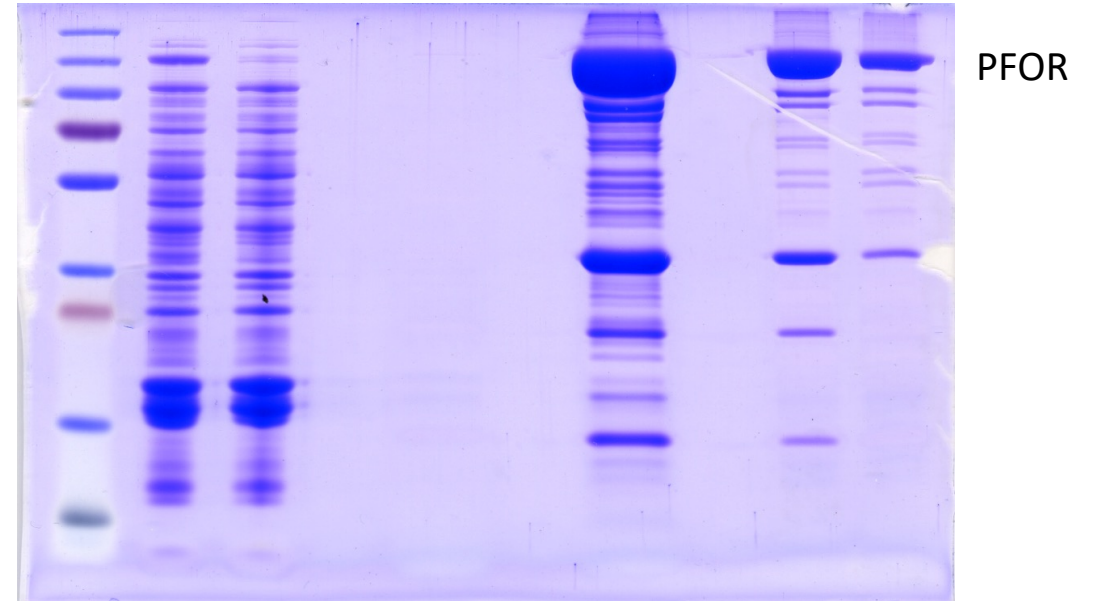

Supplement: supp [file elife-71339-supp-v1.zip]
