# Supplementary material for: Pyruvate:ferredoxin oxidoreductase and low abundant ferredoxins support aerobic photomixotrophic growth in cyanobacteria
Source: eLife journal article supplement (doi:10.7554/elife.71339), 2022-02-09
Supplement: supp [file elife_poa_e71339_Figure_2_source_data_1.xlsx]

## Sheet: Figure 2A
							Activity determination of SynLPD
																		U (µmol min-1 mg protein)
							Question: NADH as potential inhibitor of LPD (E3)
							Controls: NADP+ as cofactor / NADPH as potential inhibitor											NAD+ (mM)
										U
										µmol/min/mg								specific activity/NAD+ in mM						Lineweaver Burk blot of the three technical replicates
	NAD+ (mM)	1/NAD+	NADH (mM)	DHLA (mM)	E base	E active	delta E	Protein Konz [µg/µl)	enzyme per sample	Activity	1/V	MW	StabW	MW	StabW
	0.1	10	0	3	0.0005	0.4068	0.4063	0.42	0.01	15.8327	0.0631602	14.5286	1.7203	0.0695199	0.00874941															m1	0.0065
	0.1	10	0	3	0.0007	0.3235	0.3228	0.42	0.01	12.5789	0.0794981																			m2	0.0053
	0.1	10	0	3	0.0012	0.3906	0.3894	0.42	0.01	15.1742	0.0659014																			m3	0.005
	0.2	5	0	3	0.0004	0.7258	0.7254	0.42	0.01	28.2675	0.0353763	28.0856	0.616662	0.035617	0.000789116															MW	0.0056
	0.2	5	0	3	0.0008	0.7345	0.7337	0.42	0.01	28.5909	0.0349761
	0.2	5	0	3	0.0003	0.7034	0.7031	0.42	0.01	27.3985	0.0364984
	0.3	3.33333	0	3	0.002	0.9439	0.9419	0.42	0.01	36.7041	0.0272449	35.474	4.07928	0.0284535	0.00344527
	0.3	3.33333	0	3	0.0007	0.7942	0.7935	0.42	0.01	30.9212	0.0323403
	0.3	3.33333	0	3	0.0005	0.9961	0.9956	0.42	0.01	38.7967	0.0257754
	0.4	2.5	0	3	0.0008	1.0905	1.0897	0.42	0.01	42.4636	0.0235496	40.3346	1.92331	0.0248296	0.001164
	0.4	2.5	0	3	0.0011	0.9948	0.9937	0.42	0.01	38.7226	0.0258247
	0.4	2.5	0	3	0.0017	1.0235	1.0218	0.42	0.01	39.8176	0.0251145
	0.5	2	0	3	0.0015	1.1961	1.1946	0.42	0.01	46.5513	0.0214817	45.0575	1.43269	0.0222088	0.000703463
	0.5	2	0	3	0.0022	1.1235	1.1213	0.42	0.01	43.695	0.0228859
	0.5	2	0	3	0.0016	1.1545	1.1529	0.42	0.01	44.9264	0.0222587
	1	1	0	3	0.0017	1.674	1.6723	0.42	0.01	65.1664	0.0153453	63.8571	5.02023	0.0157268	0.0012752
	1	1	0	3	0.0021	1.7495	1.7474	0.42	0.01	68.0929	0.0146858
	1	1	0	3	0.0004	1.4968	1.4964	0.42	0.01	58.3119	0.0171492
	2	0.5	0	3	0.0024	1.7436	1.7412	0.42	0.01	67.8513	0.0147381	70.4102	2.9819	0.0142193	0.000594012
	2	0.5	0	3	0.0027	1.7912	1.7885	0.42	0.01	69.6945	0.0143483
	2	0.5	0	3	0.0011	1.892	1.8909	0.42	0.01	73.6848	0.0135713
	3	0.333333	0	3	0.0043	1.8183	1.814	0.42	0.01	70.6882	0.0141466	70.6596	2.15898	0.0141612	0.000433154
	3	0.333333	0	3	0.006	1.8743	1.8683	0.42	0.01	72.8041	0.0137355
	3	0.333333	0	3	0.0007	1.7582	1.7575	0.42	0.01	68.4865	0.0146014
	4	0.25	0	3	0.0053	1.7241	1.7188	0.42	0.01	66.9784	0.0149302	69.2308	4.84818	0.0144901	0.000977586
	4	0.25	0	3	0.0019	1.6935	1.6916	0.42	0.01	65.9185	0.0151703
	4	0.25	0	3	0.0061	1.9255	1.9194	0.42	0.01	74.7954	0.0133698
	5	0.2	0	3	0.0055	1.8818	1.8763	0.42	0.01	73.1159	0.0136769	69.9504	3.31544	0.0143174	0.000683429
	5	0.2	0	3	0.0023	1.7089	1.7066	0.42	0.01	66.503	0.0150369
	5	0.2	0	3	0.0028	1.8051	1.8023	0.42	0.01	70.2323	0.0142385
										U
										µmol/min/mg
	NAD+ (mM)	1/NAD+	NADH (mM)	DHLA (mM)	E base	E active	delta E	Protein Konz [µg/µl)	enzyme per sample	Activity	1/V	MW	StabW	MW	StabW
	0.1	10	0.1	3	0.0017	0.1053	0.1036	0.42	0.005	8.0742	0.123851	8.49245	0.501484	0.11802	0.00682271
	0.1	10	0.1	3	0.0003	0.1164	0.1161	0.42	0.005	9.0484	0.110517
	0.1	10	0.1	3	0.0002	0.1074	0.1072	0.42	0.005	8.35477	0.119692
	0.2	5	0.1	3	0.0008	0.1978	0.197	0.42	0.005	15.3534	0.065132	15.1716	0.802756	0.0660381	0.00355822
	0.2	5	0.1	3	0.0002	0.2038	0.2036	0.42	0.005	15.8678	0.0630206
	0.2	5	0.1	3	0.0022	0.1856	0.1834	0.42	0.005	14.2935	0.0699618							specific activity/NAD+ in mM						Lineweaver Burk blot of the three technical replicates
	0.3	3.33333	0.1	3	0.0028	0.2885	0.2857	0.42	0.005	22.2664	0.0449107	19.9932	2.21224	0.0504262	0.00556044																	m1	0.0096
	0.3	3.33333	0.1	3	0.0005	0.2295	0.229	0.42	0.005	17.8474	0.0560306																					m2	0.0106
	0.3	3.33333	0.1	3	0.0001	0.255	0.2549	0.42	0.005	19.8659	0.0503374																					m3	0.0107
	0.4	2.5	0.1	3	0.0039	0.3133	0.3094	0.42	0.005	24.1135	0.0414706	25.2565	1.00212	0.0396362	0.00160574																	MW	0.0103
	0.4	2.5	0.1	3	0.0009	0.3343	0.3334	0.42	0.005	25.9839	0.0384853
	0.4	2.5	0.1	3	0.0011	0.3305	0.3294	0.42	0.005	25.6722	0.0389526
	0.5	2	0.1	3	0.0016	0.4514	0.4498	0.42	0.005	35.0557	0.028526	30.6108	4.09312	0.0330491	0.00428227
	0.5	2	0.1	3	0.0043	0.3864	0.3821	0.42	0.005	29.7794	0.0335802
	0.5	2	0.1	3	0.0002	0.3466	0.3464	0.42	0.005	26.9971	0.037041
	1	1	0.1	3	0.0042	0.9076	0.9034	0.42	0.005	35.2038	0.028406	39.8488	4.24016	0.0252932	0.00279938
	1	1	0.1	3	0.0052	0.5635	0.5583	0.42	0.005	43.5118	0.0229823
	1	1	0.1	3	0.0001	0.524	0.5239	0.42	0.005	40.8308	0.0244913
	2	0.5	0.1	3	0.0003	0.6292	0.6289	0.42	0.005	49.0141	0.0204023	49.4272	0.520425	0.0202333	0.00021206
	2	0.5	0.1	3	0.0007	0.6424	0.6417	0.42	0.005	50.0117	0.0199953
	2	0.5	0.1	3	0.0001	0.6321	0.632	0.42	0.005	49.2557	0.0203022
	3	0.333333	0.1	3	0.0014	0.6936	0.6922	0.42	0.005	53.9475	0.0185366	53.6617	0.410357	0.018636	0.000143101
	3	0.333333	0.1	3	0.0027	0.6936	0.6909	0.42	0.005	53.8462	0.0185714
	3	0.333333	0.1	3	0.0009	0.6834	0.6825	0.42	0.005	53.1915	0.0188
	4	0.25	0.1	3	0.001	0.6738	0.6728	0.42	0.005	52.4355	0.019071	54.9451	3.05236	0.0182367	0.000991909
	4	0.25	0.1	3	0.0013	0.6949	0.6936	0.42	0.005	54.0566	0.0184991
	4	0.25	0.1	3	0.0009	0.7495	0.7486	0.42	0.005	58.3431	0.01714
	5	0.2	0.1	3	0.0024	0.7196	0.7172	0.42	0.005	55.8959	0.0178904	57.174	1.15211	0.0174952	0.000355336
	5	0.2	0.1	3	0.0032	0.7409	0.7377	0.42	0.005	57.4936	0.0173932
	5	0.2	0.1	3	0.0031	0.749	0.7459	0.42	0.005	58.1326	0.017202
										U
										µmol/min/mg								specific activity/NAD+ in mM						Lineweaver Burk blot of the three technical replicates
	NAD+ (mM)	1/NAD+	NADH (mM)	DHLA (mM)	E base	E active	delta E	Protein Konz [µg/µl)	enzyme per sample	Activity	1/V	MW	StabW	MW	StabW
	0.1	10	0.15	3	0.0022	0.0617	0.0595	0.2	0.01	4.86907	0.205378	5.06001	0.302819	0.198085	0.0114642
	0.1	10	0.15	3	0.001	0.0609	0.0599	0.2	0.01	4.9018	0.204007
	0.1	10	0.15	3	0.0014	0.0675	0.0661	0.2	0.01	5.40917	0.184871
	0.2	5	0.15	3	0.0023	0.1485	0.1462	0.2	0.01	11.964	0.0835841	11.7294	0.442227	0.0853385	0.0032884
	0.2	5	0.15	3	0.0005	0.1376	0.1371	0.2	0.01	11.2193	0.089132
	0.2	5	0.15	3	0.0012	0.1479	0.1467	0.2	0.01	12.0049	0.0832993
	0.3	3.33333	0.15	3	0.0004	0.176	0.1756	0.2	0.01	14.3699	0.06959	13.8598	0.56733	0.0722327	0.00299034
	0.3	3.33333	0.15	3	0.0006	0.1625	0.1619	0.2	0.01	13.2488	0.0754787
	0.3	3.33333	0.15	3	0.0011	0.1717	0.1706	0.2	0.01	13.9607	0.0716295
																															m1	0.0185
	0.4	2.5	0.15	3	0.0015	0.189	0.1875	0.2	0.01	15.3437	0.0651733	17.3131	2.45631	0.0585018	0.00786014																m2	0.0167
	0.4	2.5	0.15	3	0.0007	0.2459	0.2452	0.2	0.01	20.0655	0.0498369																				m3	0.0184
	0.4	2.5	0.15	3	0.0003	0.2023	0.202	0.2	0.01	16.5303	0.060495
																															MW	0.0178667
	0.5	2	0.15	3	0.0022	0.3442	0.342	0.2	0.01	27.9869	0.035731	25.9711	2.37903	0.0387288	0.00367739
	0.5	2	0.15	3	0.025	0.3103	0.2853	0.2	0.01	23.347	0.0428321
	0.5	2	0.15	3	0.002	0.3268	0.3248	0.2	0.01	26.5794	0.0376232
	1	1	0.15	3	0.0058	0.447	0.4412	0.2	0.01	36.1047	0.0276972	37.8996	1.74535	0.026423	0.00122309
	1	1	0.15	3	0.0023	0.4861	0.4838	0.2	0.01	39.5908	0.0252584
	1	1	0.15	3	0.0035	0.4679	0.4644	0.2	0.01	38.0033	0.0263135
	2	0.5	0.15	3	0.0016	0.5288	0.5272	0.2	0.01	43.1424	0.0231791	44.3262	1.15127	0.0225702	0.000587752
	2	0.5	0.15	3	0.0027	0.558	0.5553	0.2	0.01	45.4419	0.0220061
	2	0.5	0.15	3	0.0012	0.5437	0.5425	0.2	0.01	44.3944	0.0225253
	3	0.333333	0.15	3	0.0063	0.6046	0.5983	0.2	0.01	48.9607	0.0204245	48.6061	0.4986	0.020575	0.000212207
	3	0.333333	0.15	3	0.0003	0.5873	0.587	0.2	0.01	48.036	0.0208177
	3	0.333333	0.15	3	0.0009	0.5975	0.5966	0.2	0.01	48.8216	0.0204827
	4	0.25	0.15	3	0.0053	0.6112	0.6059	0.2	0.01	49.5827	0.0201683	50.0955	0.724827	0.0199646	0.000286673
	4	0.25	0.15	3	0.0006	0.6089	0.6083	0.2	0.01	49.7791	0.0200888
	4	0.25	0.15	3	0.002	0.6243	0.6223	0.2	0.01	50.9247	0.0196368
	5	0.2	0.15	3	0.0054	0.6725	0.6671	0.2	0.01	54.5908	0.0183181	53.3279	1.50034	0.0187619	0.0005335
	5	0.2	0.15	3	0.0003	0.6317	0.6314	0.2	0.01	51.6694	0.0193538
	5	0.2	0.15	3	0.0024	0.6589	0.6565	0.2	0.01	53.7234	0.0186139
										U
										µmol/min/mg								specific activity/NAD+ in mM						Lineweaver Burk blot of the three technical replicates
	NAD+ (mM)	1/NAD+	NADH (mM)	DHLA (mM)	E base	E active	delta E	Protein Konz [µg/µl)	enzyme per sample	Activity	1/V	MW	StabW	MW	StabW
	0.1	10	0.2	3	0.0041	0.0967	0.0926	0.42	0.01	3.60845	0.277127	3.7916	0.473539	0.266354	0.0314037
	0.1	10	0.2	3	0.0043	0.0925	0.0882	0.42	0.01	3.43699	0.290952
	0.1	10	0.2	3	0.0055	0.1166	0.1111	0.42	0.01	4.32936	0.230981																				m1	0.0275
																															m2	0.0229
	0.2	5	0.2	3	0.0024	0.1605	0.1581	0.42	0.01	6.16086	0.162315	6.57392	0.620157	0.152979	0.013717																m3	0.0271
	0.2	5	0.2	3	0.0005	0.1875	0.187	0.42	0.01	7.28704	0.13723
	0.2	5	0.2	3	0.0009	0.1619	0.161	0.42	0.01	6.27387	0.159391																				MW	0.0258333
	0.3	3.33333	0.2	3	0.0007	0.2807	0.28	0.42	0.01	10.9111	0.09165	11.0163	0.109319	0.0907806	0.000899947
	0.3	3.33333	0.2	3	0.0052	0.2908	0.2856	0.42	0.01	11.1293	0.0898529
	0.3	3.33333	0.2	3	0.0002	0.2827	0.2825	0.42	0.01	11.0085	0.0908389
	0.4	2.5	0.2	3	0.003	0.4176	0.4146	0.42	0.01	16.1562	0.0618958	17.537	1.58634	0.057327	0.00505608
	0.4	2.5	0.2	3	0.0011	0.4956	0.4945	0.42	0.01	19.2697	0.0518948
	0.4	2.5	0.2	3	0.0023	0.4433	0.441	0.42	0.01	17.1849	0.0581905
	0.5	2	0.2	3	0.0042	0.5647	0.5605	0.42	0.01	21.8416	0.0457841	22.421	0.502089	0.0446162	0.00101213
	0.5	2	0.2	3	0.0035	0.5868	0.5833	0.42	0.01	22.7301	0.0439945
	0.5	2	0.2	3	0.001	0.5833	0.5823	0.42	0.01	22.6911	0.0440701
	1	1	0.2	3	0.0041	0.9125	0.9084	0.42	0.01	35.3986	0.0282497	34.5712	1.80631	0.0289801	0.00155863
	1	1	0.2	3	0.0035	0.9226	0.9191	0.42	0.01	35.8156	0.0279208
	1	1	0.2	3	0.0007	0.8347	0.834	0.42	0.01	32.4994	0.0307698
	2	0.5	0.2	3	0.0077	1.0787	1.071	0.42	0.01	41.7349	0.0239608	40.4606	1.25153	0.0247312	0.000764027
	2	0.5	0.2	3	0.0086	1.0154	1.0068	0.42	0.01	39.2331	0.0254887
	2	0.5	0.2	3	0.0031	1.0402	1.0371	0.42	0.01	40.4138	0.024744
	3	0.333333	0.2	3	0.0025	1.2182	1.2157	0.42	0.01	47.3735	0.0211088	44.9056	2.15567	0.0223024	0.00104405
	3	0.333333	0.2	3	0.0054	1.1189	1.1135	0.42	0.01	43.391	0.0230463
	3	0.333333	0.2	3	0.0005	1.1284	1.1279	0.42	0.01	43.9521	0.022752
	4	0.25	0.2	3	0.0031	1.1811	1.178	0.42	0.01	45.9045	0.0217844	46.8189	1.71026	0.0213775	0.000764912
	4	0.25	0.2	3	0.0028	1.1771	1.1743	0.42	0.01	45.7603	0.021853
	4	0.25	0.2	3	0.0005	1.2526	1.2521	0.42	0.01	48.792	0.0204952
	5	0.2	0.2	3	0.004	1.3005	1.2965	0.42	0.005	50.5222	0.0197933	49.9156	0.526147	0.0200353	0.000209927
	5	0.2	0.2	3	0.0023	1.2762	1.2739	0.42	0.005	49.6415	0.0201444
	5	0.2	0.2	3	0.0038	1.2762	1.2724	0.42	0.005	49.583	0.0201682
										U
										µmol/min/mg
	NAD+ (mM)	1/NAD+	NADPH (mM)	DHLA (mM)	E base	E active	delta E	Protein Konz [µg/µl)	enzyme per sample	Activity	1/V	MW	StabW	MW	StabW
	0.1	10	0.1	3	0.0022	0.2018	0.1996	0.2	0.01	16.3339	0.0612224	16.6939	0.509209	0.0599298	0.00182802
	0.1	10	0.1	3	0.0034	0.2118	0.2084	0.2	0.01	17.054	0.0586372
	0.1	10	0.1	3														Summary for Ki estimation
	0.2	5	0.1	3	0.0017	0.3828	0.3811	0.2	0.01	31.1866	0.0320651	29.9018	1.81695	0.0335047	0.00203588
	0.2	5	0.1	3	0.0026	0.3523	0.3497	0.2	0.01	28.617	0.0349442
	0.2	5	0.1	3
																		MW	Stabw	m1	m2	m3
	0.3	3.33333	0.1	3	0.0027	0.5115	0.5088	0.2	0.01	41.6367	0.0240173	38.0974	5.0053	0.026477	0.0034786		0	0.0056	0.000793725	0.0065	0.0053	0.005
	0.3	3.33333	0.1	3	0.0013	0.4236	0.4223	0.2	0.01	34.5581	0.0289368						0.1	0.0103	0.000608276	0.0096	0.0106	0.0107
	0.3	3.33333	0.1	3													0.15	0.0178667	0.0010116	0.0185	0.0167	0.0184
																	0.2	0.0258333	0.0025482	0.0275	0.0229	0.0271
	0.4	2.5	0.1	3	0.0039	0.532	0.5281	0.2	0.01	43.216	0.0231396	44.239	1.44662	0.0226166	0.000739565
	0.4	2.5	0.1	3	0.0002	0.5533	0.5531	0.2	0.01	45.2619	0.0220937
	0.4	2.5	0.1	3
	0.5	2	0.1	3	0.0027	0.5807	0.578	0.2	0.01	47.2995	0.0211419	47.2381	0.0867971	0.0211694	3.88974e-05
	0.5	2	0.1	3	0.0021	0.5786	0.5765	0.2	0.01	47.1768	0.0211969
	0.5	2	0.1	3
	1	1	0.1	3	0.0007	0.713	0.7123	0.2	0.01	58.2897	0.0171557	60.5033	3.13048	0.0165502	0.000856318
	1	1	0.1	3	0	0.7664	0.7664	0.2	0.01	62.7169	0.0159447
	1	1	0.1	3
	2	0.5	0.1	3	0.0009	0.8213	0.8204	0.2	0.01	67.1358	0.0148952	68.0565	1.30196	0.0146964	0.000281149
	2	0.5	0.1	3	0.0006	0.8435	0.8429	0.2	0.01	68.9771	0.0144976
	2	0.5	0.1	3
	3	0.333333	0.1	3	0.0048	0.8334	0.8286	0.2	0.01	67.8069	0.0147478	67.856	0.0694377	0.0147371	1.50806e-05
	3	0.333333	0.1	3	0.0001	0.8299	0.8298	0.2	0.01	67.9051	0.0147264
	3	0.333333	0.1	3
	4	0.25	0.1	3	0.0044	0.8264	0.822	0.2	0.01	67.2668	0.0148662	68.0196	1.06471	0.0147034	0.000230153
	4	0.25	0.1	3	0.0003	0.8407	0.8404	0.2	0.01	68.7725	0.0145407
	4	0.25	0.1	3
																			From combination of all curves
	5	0.2	0.1	3	0.0058	0.8489	0.8431	0.2	0.01	68.9935	0.0144941	68.5884	0.572861	0.0145802	0.000121776				Ki	0.0372608						Ki1	0.0389105
	5	0.2	0.1	3	0.0034	0.8366	0.8332	0.2	0.01	68.1833	0.0146663															Ki2	0.0286772
	5	0.2	0.1	3																						Ki3	0.0471807
																										MW	0.0382561
																										StabW	0.0092691

## Sheet: Figure 2B
time	1 anaerobic	2 aerobic	3 continuation of aerobic sample rendered anaerobic
0	0.006	0.0056	0.0991
0.0333333	0.0101	0.0009	0.1116
0.0666667	-0.0029	-0.0025	0.1124
0.1	0.006	0.0076	0.1027
0.133333	0.0071	0.001	0.1078
0.166667	0.0028	0.0148	0.1199
0.2	0.0098	0.0068	0.1011
0.233333	0.0025	0.0004	0.1104
0.266667	-0.0029	0.0002	0.107
0.3	0.0091	0.0025	0.1051
0.333333	0.0057	0.0037	0.1105
0.366667	0.003	0.0041	0.1138
0.4	-0.0007	-0.0053	0.1058
0.433333	0.0008	-0.0035	0.112
0.466667	0.0003	-0.0024	0.1101
0.5	-0.0013	-0.0075	0.1028
0.533333	-0.0036	-0.0017	0.1124
0.566667	-0.0019	-0.0076	0.1086
0.6	-0.0002	-0.0062	0.106
0.633333	-0.0026	-0.0036	0.0955
0.666667	0.0012	-0.0076	0.1127
0.7	0.0094	-0.0131	0.1063
0.733333	0.0072	-0.0038	0.1121
0.766667	0.0073	-0.0083	0.1021
0.8	0.0015	-0.0072	0.1109
0.833333	-0.0088	-0.0118	0.1091
0.866667	-0.0058	-0.0041	0.1118
0.9	0.0038	-0.0068	0.1133
0.933333	-0.0028	0.0085	0.1103
0.966667	-0.0021	-0.0061	0.0993
1	-0.006	-0.0051	0.0984
1.03333	0.006	-0.0019	0.1065
1.06667	-0.0022	-0.0087	0.1024
1.1	-0.0001	0.0068	0.0957
1.13333	0.0024	0.0012	0.1081
1.16667	-0.0008	-0.0053	0.0997
1.2	0.0027	0.0054	0.0987
1.23333	0.004	-0.0042	0.0968
1.26667	0.0003	0.0004	0.1151
1.3	-0.0022	0.0006	0.1048
1.33333	-0.0015	0.0036	0.0985
1.36667	0.0003	0.0002	0.0937
1.4	0.007	0.0003	0.1037
1.43333	-0.0002	0.0073	0.1025
1.46667	0.0007	0.0028	0.1026
1.5	0.0024	-0.0007	0.1003
1.53333	0.0074	0.0061	0.106
1.56667	0.0059	-0.0005	0.1034
1.6	0.006	-0.001	0.0949
1.63333	0.0097	-0.0014	0.1058
1.66667	0.0043	-0.0036	0.1054
1.7	0.0026	0.0069	0.1037
1.73333	0.0074	-0.0006	0.0921
1.76667	0.0045	0.005	0.0969
1.8	0.0076	-0.0007	0.1064
1.83333	0.0071	-0.0017	0.106
1.86667	0.004	-0.0046	0.0972
1.9	0.0038	-0.0077	0.1004
1.93333	0.0043	0.0007	0.1022
1.96667	0.0028	-0.0057	0.1062
2	-0.0033	-0.0038	0.0982
2.03333	0.0018	-0.0061	0.0872
2.06667	0.0013	-0.0094	0.0881
2.1	-0.0014	0.001	0.0971
2.13333	0.0012	-0.0029	0.0924
2.16667	-0.0024	-0.0132	0.1002
2.2	-0.005	-0.0015	0.0869
2.23333	0.0001	-0.0037	0.0919
2.26667	-0.0055	-0.001	0.0917
2.3	-0.0039	-0.0016	0.0947
2.33333	0.0015	-0.0068	0.1012
2.36667	0.0057	-0.0107	0.0864
2.4	-0.0028	-0.0033	0.1113
2.43333	-0.0025	-0.0044	0.0986
2.46667	-0.0005	-0.0067	0.0923
2.5	-0.0034	-0.0031	0.1069
2.53333	-0.001	-0.0049	0.0919
2.56667	0.0085	-0.0059	0.0943
2.6	0.0017	0.0024	0.0953
2.63333	0.0045	-0.0002	0.0994
2.66667	0.0019	-0.004	0.0909
2.7	0.0021	-0.0123	0.0966
2.73333	0.0016	-0.0016	0.0956
2.76667	0.0045	-0.0033	0.095
2.8	0.0061	-0.0018	0.0958
2.83333	0.0061	-0.0032	0.0979
2.86667	0.0044	0.0039	0.0906
2.9	0.0084	0.0081	0.0992
2.93333	0.0039	-0.0039	0.094
2.96667	0.0098	0.0047	0.0919
3	0.0054	0.0083	0.0947
3.03333	0.0099	0.0042	0.0913
3.06667	0.0084	0.0092	0.0915
3.1	0.0061	0.0035	0.0919
3.13333	0.0038	0.0023	0.0973
3.16667	0.0057	0.0061	0.0887
3.2	0.0076	0.006	0.101
3.23333	0.0087	0.0096	0.097
3.26667	0.0056	0.0056	0.0967
3.3	0.0051	-0.0022	0.0958
3.33333	-0.0053	0.0079	0.102
3.36667	0.0093	0.0038	0.0972
3.4	0.0047	0.0066	0.098
3.43333	0.0042	0.0086	0.1029
3.46667	0.0117	-0.0038	0.0942
3.5	0.0049	0.0023	0.0961
3.53333	-0.002	0.0062	0.1026
3.56667	0.0119	0.0016	0.0968
3.6	0.0056	0.0032	0.101
3.63333	0.0059	0.0007	0.0967
3.66667	0.002	-0.0056	0.099
3.7	0.0074	0.005	0.1078
3.73333	0.0052	0.0144	0.1109
3.76667	0.0027	0.0035	0.1044
3.8	0.0047	0.0018	0.0921
3.83333	0.009	0.0226	0.0982
3.86667	0.0012	0	0.0897
3.9	0.0046	0.0086	0.1026
3.93333	0.005	0.0029	0.0883
3.96667	0.0074	0.0076	0.0974
4	0.0036	0.0096	0.0952
4.03333	0.0078	-0.0003	0.1019
4.06667	0.0061	0.0133	0.1032
4.1	0.0046	0.0006	0.0971
4.13333	-0.0028	-0.0025	0.0951
4.16667	0.0006	0.0003	0.0956
4.2	0.005	0.0002	0.0971
4.23333	0.0041	0.004	0.0963
4.26667	0.006	-0.0024	0.1029
4.3	0.0008	-0.0005	0.0961
4.33333	0.0086	-0.0065	0.0886
4.36667	0.0022	-0.0005	0.0969
4.4	0.0033	0.0084	0.0963
4.43333	0.0075	0.0074	0.085
4.46667	0.0034	0.0015	0.094
4.5	0.0056	0.0038	0.1059
4.53333	0.0047	-0.0033	0.1053
4.56667	0.0079	-0.0085	0.0966
4.6	0.0086	-0.0003	0.0914
4.63333	-0.0012	0.0001	0.1051
4.66667	0.0072	0.0074	0.0996
4.7	0.0043	0.0061	0.0918
4.73333	0.0102	-0.0021	0.1051
4.76667	0.0042	0.0046	0.0921
4.8	0.0068	0.002	0.0989
4.83333	0.0097	0.0011	0.0968
4.86667	0.0036	-0.0039	0.1026
4.9	0.004	0.0014	0.0985
4.93333	0.0018	-0.006	0.1081
4.96667	0.0067	0.0009	0.0992
5	0.0055	-0.0096	0.1033
5.03333	0.0024	-0.1	0.0904
5.06667	-0.0159		0.1026
5.1	-0.0295		0.1099
5.13333	-0.0211		0.1063
5.16667	0.0017		0.095
5.2	0.2327	0.1985	0.0991
5.23333	0.2316	0.1999	0.1053
5.26667	0.2363	0.1984	0.1006
5.3	0.2372	0.1858	0.1154
5.33333	0.235	0.1908	0.0985
5.36667	0.2362	0.204	0.1038
5.4	0.2351	0.1902	0.1035
5.43333	0.2332	0.1959	0.0987
5.46667	0.2414	0.1834	0.0965
5.5	0.2363	0.1995	0.1014
5.53333	0.2365	0.1982	0.1028
5.56667	0.2345	0.2018	0.1019
5.6	0.2304	0.2023	0.1114
5.63333	0.2217	0.2072	0.1068
5.66667	0.2357	0.1919	0.0938
5.7	0.2331	0.2107	0.0997
5.73333	0.2233	0.2223	0.1074
5.76667	0.2234	0.2128	0.1043
5.8	0.2214	0.2222	0.1166
5.83333	0.2283	0.2126	0.114
5.86667	0.2211	0.2203	0.1104
5.9	0.2252	0.2175	0.1093
5.93333	0.2268	0.2191	0.1021
5.96667	0.2213	0.2143	0.0992
6	0.2191	0.2159	0.1011
6.03333	0.2237	0.2183	0.1055
6.06667	0.2239	0.2144	0.112
6.1	0.2331	0.2227	0.1131
6.13333	0.2221	0.2081	0.114
6.16667	0.2144	0.2171	0.1039
6.2	0.2159	0.2086	0.1148
6.23333	0.2146	0.2168	0.1208
6.26667	0.223	0.2065	0.1129
6.3	0.2213	0.2184	0.1021
6.33333	0.2207	0.2083	0.1155
6.36667	0.2296	0.2034	0.1032
6.4	0.2282	0.2004	0.1086
6.43333	0.2242	0.1993	0.1097
6.46667	0.2272	0.1959	0.1077
6.5	0.228	0.199	0.1116
6.53333	0.2247	0.1882	0.1066
6.56667	0.2236	0.2031	0.1065
6.6	0.2281	0.1839	0.1061
6.63333	0.224	0.1922	0.1052
6.66667	0.2246	0.1926	0.1057
6.7	0.2189	0.1992	0.1126
6.73333	0.2261	0.2035	0.1172
6.76667	0.2284	0.1906	0.1108
6.8	0.2239	0.1972	0.1006
6.83333	0.227	0.1895	0.1093
6.86667	0.2292	0.1937	0.1178
6.9	0.2305	0.198	0.1101
6.93333	0.2318	0.1972	0.1141
6.96667	0.2256	0.1934	0.1146
7	0.235	0.1972	0.1287
7.03333	0.2327	0.1971	0.127
7.06667	0.2384	0.1974	0.1175
7.1	0.2402	0.1929	0.1198
7.13333	0.2364	0.1981	0.1123
7.16667	0.2264	0.192	0.1095
7.2	0.2249	0.198	0.1129
7.23333	0.2359	0.1823	0.1189
7.26667	0.2256	0.1921	0.117
7.3	0.2361	0.1904	0.1218
7.33333	0.2325	0.1898	0.121
7.36667	0.232	0.191	0.1109
7.4	0.2317	0.1861	0.1202
7.43333	0.2265	0.1887	0.1175
7.46667	0.233	0.1924	0.1166
7.5	0.2351	0.1959	0.1203
7.53333	0.2325	0.1914	0.1126
7.56667	0.2305	0.2067	0.1275
7.6	0.2249	0.2013	0.1229
7.63333	0.2301	0.2002	0.1116
7.66667	0.2336	0.1945	0.1314
7.7	0.2325	0.1875	0.1042
7.73333	0.2285	0.1926	0.1219
7.76667	0.2289	0.1855	0.1277
7.8	0.2282	0.1847	0.1276
7.83333	0.2309	0.1833	0.1153
7.86667	0.232	0.1984	0.1181
7.9	0.2306	0.1912	0.1167
7.93333	0.2294	0.19	0.1229
7.96667	0.236	0.1943	0.121
8	0.2348	0.1931	0.1217
8.03333	0.2338	0.1867	0.134
8.06667	0.2305	0.1877	0.1225
8.1	0.229	0.179	0.1165
8.13333	0.2363	0.1853	0.1229
8.16667	0.2331	0.1837	0.1183
8.2	0.2321	0.1906	0.1161
8.23333	0.2293	0.1867	0.1232
8.26667	0.2346	0.1938	0.1246
8.3	0.2318	0.1807	0.1244
8.33333	0.2349	0.195	0.1257
8.36667	0.2361	0.1905	0.132
8.4	0.2288	0.1899	0.1212
8.43333	0.2346	0.1935	0.1268
8.46667	0.2323	0.1886	0.1305
8.5	0.2359	0.1864	0.1212
8.53333	0.2325	0.1913	0.1217
8.56667	0.2321	0.1918	0.1251
8.6	0.2379	0.1951	0.1418
8.63333	0.2323	0.1955	0.1287
8.66667	0.232	0.1931	0.1333
8.7	0.2323	0.1917	0.135
8.73333	0.2297	0.1844	0.136
8.76667	0.235	0.1847	0.1305
8.8	0.2298	0.1913	0.1387
8.83333	0.2295	0.1879	0.1264
8.86667	0.2323	0.1943	0.1178
8.9	0.2336	0.199	0.1226
8.93333	0.2441	0.1983	0.1288
8.96667	0.2377	0.1889	0.125
9	0.2367	0.1898	0.1242
9.03333	0.2319	0.19	0.1334
9.06667	0.2312	0.1891	0.1374
9.1	0.2345	0.1941	0.1371
9.13333	0.2337	0.1863	0.137
9.16667	0.2339	0.1768	0.1271
9.2	0.2356	0.1966	0.1326
9.23333	0.2403	0.192	0.1398
9.26667	0.2345	0.182	0.1212
9.3	0.2371	0.1947	0.1368
9.33333	0.2365	0.1758	0.1311
9.36667	0.2375	0.189	0.1407
9.4	0.2377	0.1884	0.1382
9.43333	0.2348	0.1871	0.1332
9.46667	0.2401	0.1889	0.1354
9.5	0.2346	0.1756	0.1246
9.53333	0.2353	0.1873	0.1345
9.56667	0.2423	0.1815	0.1255
9.6	0.2391	0.1866	0.1321
9.63333	0.235	0.1837	0.1271
9.66667	0.247	0.181	0.1365
9.7	0.2423	0.1894	0.1225
9.73333	0.2469	0.1922	0.1333
9.76667	0.2393	0.1923	0.1315
9.8	0.2404	0.1748	0.129
9.83333	0.241	0.1915	0.137
9.86667	0.2405	0.185	0.1409
9.9	0.2448	0.1883	0.1398
9.93333	0.2435	0.1882	0.1364
9.96667	0.2385	0.1825	0.1441
10	0.2358	0.1778	0.1411
10.0333	0.2459	0.1894	0.1411
10.0667	0.2389	0.1841	0.1484
10.1	0.2381	0.1853	0.134
10.1333	0.2449	0.1798	0.1269
10.1667	0.2408	0.1967	0.1349
10.2	0.2468	0.1916	0.1233
10.2333	0.2392	0.1888	0.1375
10.2667	0.2433	0.1818	0.1326
10.3	0.2447	0.1891	0.1444
10.3333	0.242	0.1733	0.1451
10.3667	0.2519	0.1782	0.1419
10.4	0.2485	0.1799	0.1321
10.4333	0.2515	0.1856	0.1425
10.4667	0.253	0.1771	0.1418
10.5	0.2424	0.1869	0.1397
10.5333	0.253	0.1831	0.1391
10.5667	0.2478	0.1788	0.1477
10.6	0.2478	0.1853	0.1589
10.6333	0.2445	0.1899	0.1481
10.6667	0.2463	0.1958	0.1364
10.7	0.2508	0.1812	0.1362
10.7333	0.2434	0.1808	0.1483
10.7667	0.2514	0.1746	0.1382
10.8	0.2444	0.1791	0.1379
10.8333	0.2477	0.1855	0.1539
10.8667	0.2503	0.1827	0.1392
10.9	0.2518	0.1886	0.1548
10.9333	0.2529	0.1897	0.1544
10.9667	0.244	0.1746	0.1562
11	0.2472	0.1798	0.1504
11.0333	0.2509	0.1828	0.1473
11.0667	0.2534	0.1705	0.1392
11.1	0.2538	0.183	0.149
11.1333	0.2492	0.1906	0.1519
11.1667	0.2474	0.1873	0.1436
11.2	0.2522	0.1726	0.1534
11.2333	0.2531	0.1758	0.1442
11.2667	0.2533	0.1808	0.1494
11.3	0.2541	0.1891	0.1497
11.3333	0.2573	0.1886	0.1496
11.3667	0.2526	0.1825	0.152
11.4	0.2568	0.1838	0.1526
11.4333	0.2599	0.1757	0.1448
11.4667	0.2558	0.1912	0.1481
11.5	0.2589	0.1784	0.1537
11.5333	0.2607	0.1836	0.1488
11.5667	0.2598	0.1822	0.1473
11.6	0.2545	0.1818	0.1418
11.6333	0.2561	0.1721	0.1602
11.6667	0.266	0.1864	0.1561
11.7	0.2659	0.1695	0.1383
11.7333	0.2691	0.1724	0.151
11.7667	0.2564	0.1826	0.1595
11.8	0.2699	0.1809	0.1614
11.8333	0.2574	0.1807	0.1804
11.8667	0.2605	0.1788	0.1595
11.9	0.2686	0.17	0.1629
11.9333	0.263	0.1761	0.1678
11.9667	0.2657	0.1705	0.1631
12	0.2621	0.1742	0.1583
12.0333	0.264	0.1682	0.1467
12.0667	0.2634	0.1731	0.151
12.1	0.2641	0.1809	0.1612
12.1333	0.2635	0.1767	0.1707
12.1667	0.2666	0.1851	0.1539
12.2	0.2732	0.1805	0.1633
12.2333	0.2678	0.1828	0.1674
12.2667	0.2665	0.1867	0.1641
12.3	0.2638	0.1811	0.164
12.3333	0.2762	0.1854	0.165
12.3667	0.2633	0.1787	0.1586
12.4	0.2668	0.1823	0.1642
12.4333	0.2667	0.1855	0.1547
12.4667	0.2717	0.1866	0.1625
12.5	0.2655	0.1836	0.1734
12.5333	0.2706	0.183	0.1742
12.5667	0.2695	0.1791	0.1731
12.6	0.2657	0.1773	0.1712
12.6333	0.2728	0.1816	0.1697
12.6667	0.274	0.1858	0.1735
12.7	0.2768	0.1785	0.1678
12.7333	0.2707	0.1819	0.1745
12.7667	0.272	0.1791	0.1794
12.8	0.2778	0.1866	0.1677
12.8333	0.2757	0.1724	0.1884
12.8667	0.28	0.1796	0.1767
12.9	0.2758	0.1786	0.1763
12.9333	0.2754	0.1782	0.1748
12.9667	0.2833	0.1786	0.1778
13	0.2822	0.1758	0.167
13.0333	0.2787	0.1674	0.1763
13.0667	0.2857	0.1852	0.1769
13.1	0.2782	0.1826	0.1815
13.1333	0.2756	0.1859	0.1866
13.1667	0.2859	0.1716	0.1784
13.2	0.2792	0.1892	0.1783
13.2333	0.2833	0.1793	0.1816
13.2667	0.2888	0.1695	0.1866
13.3	0.2808	0.1751	0.174
13.3333	0.2845	0.1806	0.1735
13.3667	0.2781	0.1846	0.1775
13.4	0.2839	0.176	0.1932
13.4333	0.2847	0.1823	0.1854
13.4667	0.2828	0.1741	0.1925
13.5	0.2897	0.177	0.1815
13.5333	0.2897	0.1753	0.1834
13.5667	0.2895	0.1783	0.183
13.6	0.2796	0.1887	0.1771
13.6333	0.2867	0.174	0.1947
13.6667	0.2971	0.181	0.1945
13.7	0.2948	0.1729	0.1993
13.7333	0.2925	0.1805	0.1943
13.7667	0.2972	0.1817	0.1986
13.8	0.2919	0.1707	0.1927
13.8333	0.2882	0.1823	0.1975
13.8667	0.2986	0.1714	0.2054
13.9	0.3018	0.1886	0.1906
13.9333	0.3011	0.1786	0.1959
13.9667	0.2982	0.1792	0.1961
14	0.3015	0.1754	0.1956
14.0333	0.2944	0.178	0.2023
14.0667	0.3002	0.1791	0.194
14.1	0.3027	0.1824	0.196
14.1333	0.3019	0.1785	0.2097
14.1667	0.2963	0.164	0.2122
14.2	0.2985	0.169	0.2073
14.2333	0.3002	0.1779	0.2113
14.2667	0.3049	0.1801	0.2047
14.3	0.305	0.1729	0.2047
14.3333	0.3093	0.1844	0.2001
14.3667	0.3089	0.1712	0.1969
14.4	0.305	0.1767	0.2047
14.4333	0.3148	0.1768	0.2077
14.4667	0.3123	0.1705	0.2067
14.5	0.3085	0.1702	0.2091
14.5333	0.3079	0.1733	0.2048
14.5667	0.3109	0.1674	0.2149
14.6	0.3109	0.1749	0.2127
14.6333	0.3093	0.1787	0.2195
14.6667	0.308	0.1739	0.2103
14.7	0.315	0.1766	0.2106
14.7333	0.3138	0.1685	0.2142
14.7667	0.3174	0.1722	0.2049
14.8	0.3124	0.1685	0.2173
14.8333	0.3203	0.1801	0.205
14.8667	0.3168	0.1784	0.2244
14.9	0.325	0.1698	0.2061
14.9333	0.3204	0.1828	0.205
14.9667	0.3201	0.1714	0.2093
15	0.312	0.1743	0.2139
15.0333	0.3167	0.1779	0.2072
15.0667	0.3262	0.1732	0.2124
15.1	0.3276	0.1797	0.2187
15.1333	0.32	0.1765	0.223
15.1667	0.3244	0.183	0.216
15.2	0.3303	0.1777	0.2357
15.2333	0.3301	0.1848	0.2126
15.2667	0.3242	0.1759	0.2077
15.3	0.3279	0.1774	0.2383
15.3333	0.336	0.1727	0.2176
15.3667	0.3376	0.1676	0.2214
15.4	0.3297	0.1753	0.2324
15.4333	0.3373	0.18	0.2151
15.4667	0.3324	0.185	0.2213
15.5	0.3364	0.1754	0.2322
15.5333	0.3299	0.1789	0.2269
15.5667	0.327	0.182	0.2332
15.6	0.3317	0.174	0.2285
15.6333	0.3375	0.1782	0.2169
15.6667	0.3378	0.1727	0.2184
15.7	0.3304	0.1711	0.2246
15.7333	0.3298	0.1702	0.2298
15.7667	0.3393	0.1819	0.2399
15.8	0.3407	0.1638	0.2321
15.8333	0.34	0.1676	0.2287
15.8667	0.3421	0.175	0.2365
15.9	0.3441	0.1837	0.2373
15.9333	0.342	0.1765	0.2441
15.9667	0.3436	0.1698	0.2393
16	0.3497	0.1734	0.2428
16.0333	0.35	0.1707	0.2382
16.0667	0.352	0.181	0.2347
16.1	0.3589	0.1644	0.2378
16.1333	0.3505	0.1759	0.2389
16.1667	0.352	0.1759	0.24
16.2	0.3457	0.1828	0.245
16.2333	0.3497	0.1819	0.2509
16.2667	0.3498	0.1727	0.2458
16.3	0.354	0.1665	0.2396
16.3333	0.3548	0.1761	0.2335
16.3667	0.3543	0.1816	0.2486
16.4	0.3641	0.1894	0.2293
16.4333	0.3668	0.1665	0.2472
16.4667	0.3701	0.1805	0.2369
16.5	0.3545	0.1721	0.2388
16.5333	0.3611	0.1826	0.2382
16.5667	0.3554	0.1788	0.2443
16.6	0.3609	0.1693	0.2495
16.6333	0.3646	0.1724	0.2449
16.6667	0.3624	0.1637	0.2391
16.7	0.367	0.1667	0.2354
16.7333	0.3722	0.1689	0.2405
16.7667	0.3635	0.169	0.2485
16.8	0.3608	0.1722	0.257
16.8333	0.3676	0.1745	0.2529
16.8667	0.3698	0.1706	0.2502
16.9	0.3725	0.1744	0.2546
16.9333	0.3682	0.1588	0.2512
16.9667	0.3675	0.1801	0.2516
17	0.3715	0.1703	0.2499
17.0333	0.3701	0.1743	0.2572
17.0667	0.3743	0.1735	0.2522
17.1	0.3742	0.1649	0.2674
17.1333	0.3672	0.1712	0.2626
17.1667	0.3701	0.1596	0.2425
17.2	0.3808	0.1773	0.2403
17.2333	0.3685	0.1658	0.2592
17.2667	0.3823	0.1742	0.2656
17.3	0.3755	0.1669	0.2557
17.3333	0.3823	0.1668	0.2515
17.3667	0.3815	0.1687	0.2744
17.4	0.3838	0.1725	0.2645
17.4333	0.3855	0.1745	0.2595
17.4667	0.3812	0.1702	0.2694
17.5	0.3828	0.1685	0.2674
17.5333	0.3852	0.1637	0.2686
17.5667	0.384	0.1828	0.2709
17.6	0.3881	0.1671	0.2523
17.6333	0.3954	0.1602	0.2728
17.6667	0.3905	0.1665	0.2636
17.7	0.3911	0.1683	0.2711
17.7333	0.3902	0.1684	0.2674
17.7667	0.3918	0.1674	0.2644
17.8	0.3985	0.1725	0.2732
17.8333	0.3961	0.1651	0.2652
17.8667	0.3983	0.1744	0.2664
17.9	0.3936	0.1669	0.2705
17.9333	0.3974	0.1615	0.2763
17.9667	0.3919	0.1669	0.2869
18	0.4041	0.1646	0.2764
18.0333	0.3959	0.1575	0.2886
18.0667	0.4024	0.1718	0.2888
18.1	0.4012	0.1678	0.2744
18.1333	0.4007	0.1698	0.2825
18.1667	0.399	0.1766	0.2798
18.2	0.3999	0.1687	0.2876
18.2333	0.4069	0.1605	0.2789
18.2667	0.4037	0.169	0.288
18.3	0.4117	0.1712	0.2803
18.3333	0.4036	0.1698	0.2812
18.3667	0.4071	0.1605	0.2755
18.4	0.409	0.1714	0.2888
18.4333	0.4109	0.1735	0.3005
18.4667	0.4174	0.1618	0.2934
18.5	0.4122	0.1681	0.2914
18.5333	0.4131	0.1598	0.294
18.5667	0.4148	0.1804	0.294
18.6	0.4189	0.1645	0.2817
18.6333	0.4124	0.1799	0.2877
18.6667	0.4182	0.1731	0.2766
18.7	0.4119	0.1747	0.2968
18.7333	0.4283	0.1707	0.3114
18.7667	0.4243	0.1633	0.298
18.8	0.4222	0.1609	0.2946
18.8333	0.4222	0.1593	0.2948
18.8667	0.431	0.1791	0.2938
18.9	0.427	0.1605	0.2924
18.9333	0.425	0.1685	0.3078
18.9667	0.4321	0.1712	0.3013
19	0.4435	0.16	0.3048
19.0333	0.4245	0.1587	0.293
19.0667	0.4347	0.1642	0.3074
19.1	0.4312	0.1682	0.2941
19.1333	0.4337	0.1733	0.2994
19.1667	0.4358	0.1689	0.3157
19.2	0.4482	0.1749	0.308
19.2333	0.4439	0.1636	0.3181
19.2667	0.4512	0.1649	0.2979
19.3	0.4463	0.1571	0.3084
19.3333	0.4462	0.1616	0.3197
19.3667	0.4419	0.1645	0.3069
19.4	0.4462	0.1585	0.3191
19.4333	0.4524	0.1665	0.3212
19.4667	0.456	0.1668	0.3162
19.5	0.4511	0.1689	0.3182
19.5333	0.456	0.1682	0.3186
19.5667	0.4494	0.1651	0.3207
19.6	0.4573	0.1664	0.3178
19.6333	0.4585	0.1666	0.3245
19.6667	0.4529	0.1548	0.321
19.7	0.4621	0.1741	0.325
19.7333	0.4602	0.1699	0.3157
19.7667	0.452	0.1545	0.3233
19.8	0.4599	0.168	0.3272
19.8333	0.4625	0.1649	0.3201
19.8667	0.4594	0.1649	0.3294
19.9	0.4614	0.1619	0.3282
19.9333	0.4783	0.1685	0.3338
19.9667	0.4702	0.1661	0.3352
20	0.4802	0.1627	0.3296
20.0333	0.4696	0.1695	0.3377
20.0667	0.4703	0.1752	0.3348
20.1	0.4736	0.1553	0.3523
20.1333	0.477	0.1672	0.3418
20.1667	0.4798	0.167	0.3302
20.2	0.4794	0.1675	0.3375
20.2333	0.4799	0.1727	0.3463
20.2667	0.4823	0.166	0.3471
20.3	0.4803	0.1601	0.3331
20.3333	0.479	0.16	0.3495
20.3667	0.4877	0.1612	0.3423
20.4	0.4843	0.1638	0.3518
20.4333	0.4868	0.1576	0.3279
20.4667	0.4959	0.1551	0.3334
20.5	0.4913	0.1561	0.3502
20.5333	0.5061	0.167	0.3427
20.5667	0.4946	0.1663	0.361
20.6	0.497	0.1599	0.3607
20.6333	0.4944	0.1719	0.347
20.6667	0.4955	0.1614	0.3538
20.7	0.493	0.1688	0.3521
20.7333	0.4997	0.1554	0.3509
20.7667	0.5085	0.1648	0.357
20.8	0.5098	0.1601	0.3441
20.8333	0.5095	0.1613	0.3467
20.8667	0.5132	0.1579	0.3524
20.9	0.5057	0.1684	0.3782
20.9333	0.5174	0.1657	0.3631
20.9667	0.5107	0.1611	0.3816
21	0.5132	0.1669	0.3676
21.0333	0.523	0.1671	0.3616
21.0667	0.5132	0.1606	0.3675
21.1	0.5157	0.1738	0.3628
21.1333	0.5161	0.17	0.3575
21.1667	0.5193	0.1689	0.3748
21.2	0.5187	0.1667	0.3775
21.2333	0.52	0.1608	0.3728
21.2667	0.5239	0.1636	0.3748
21.3	0.5282	0.1556	0.3761
21.3333	0.5304	0.1616	0.3778
21.3667	0.5277	0.1684	0.3727
21.4	0.5407	0.1721	0.3845
21.4333	0.5302	0.1625	0.3731
21.4667	0.5392	0.1615	0.3822
21.5	0.5303	0.1504	0.3826
21.5333	0.5382	0.1646	0.3833
21.5667	0.5323	0.1607	0.3865
21.6	0.5416	0.1577	0.4035
21.6333	0.5392	0.164	0.3763
21.6667	0.5473	0.1608	0.3808
21.7	0.5484	0.1704	0.3855
21.7333	0.5549	0.1691	0.3842
21.7667	0.545	0.151	0.3922
21.8	0.5517	0.1454	0.3901
21.8333	0.5566	0.1517	0.4069
21.8667	0.5623	0.1592	0.4018
21.9	0.5535	0.1601	0.4042
21.9333	0.554	0.1648	0.3917
21.9667	0.5505	0.167	0.3917
22	0.5658	0.1653	0.3807
22.0333	0.5677	0.164	0.3964
22.0667	0.5693	0.1534	0.3839
22.1	0.5741	0.1576	0.4083
22.1333	0.5658	0.1678	0.4114
22.1667	0.5648	0.1526	0.3961
22.2	0.5763	0.1635	0.4116
22.2333	0.5756	0.1571	0.4276
22.2667	0.5751	0.1661	0.4052
22.3	0.5796	0.1621	0.4223
22.3333	0.5753	0.1707	0.4195
22.3667	0.5708	0.1661	0.4042
22.4	0.5744	0.1591	0.4154
22.4333	0.5918	0.1621	0.4158
22.4667	0.5852	0.164	0.4188
22.5	0.5832	0.1575	0.4097
22.5333	0.5856	0.163	0.4126
22.5667	0.5937	0.1649	0.413
22.6	0.5868	0.1544	0.4222
22.6333	0.5992	0.1622	0.4109
22.6667	0.591	0.1587	0.4258
22.7	0.5885	0.1572	0.437
22.7333	0.593	0.1551	0.4088
22.7667	0.5981	0.1589	0.4252
22.8	0.6036	0.1578	0.4271
22.8333	0.5908	0.1631	0.4382
22.8667	0.5939	0.1514	0.4347
22.9	0.6031	0.1569	0.4211
22.9333	0.6168	0.1497	0.4331
22.9667	0.6135	0.1539	0.4238
23	0.6133	0.152	0.452
23.0333	0.6218	0.1568	0.4209
23.0667	0.6166	0.1549	0.4325
23.1	0.6122	0.1587	0.439
23.1333	0.6238	0.1546	0.4294
23.1667	0.6272	0.1588	0.4402
23.2	0.6189	0.1775	0.4574
23.2333	0.6177	0.1542	0.4194
23.2667	0.6201	0.1558	0.4442
23.3	0.6304	0.1542	0.4364
23.3333	0.6368	0.1463	0.4366
23.3667	0.6304	0.1634	0.4604
23.4	0.632	0.147	0.4404
23.4333	0.6358	0.1437	0.4563
23.4667	0.6354	0.1565	0.4473
23.5	0.6328	0.1621	0.4452
23.5333	0.6399	0.1514	0.4523
23.5667	0.6449	0.1658	0.4596
23.6	0.6346	0.1567	0.462
23.6333	0.6394	0.1545	0.4591
23.6667	0.6298	0.1527	0.4458
23.7	0.6541	0.1508	0.4632
23.7333	0.6557	0.1558	0.4337
23.7667	0.6601	0.146	0.4601
23.8	0.6512	0.1475	0.4558
23.8333	0.6572	0.1449	0.4487
23.8667	0.6648	0.1544	0.4576
23.9	0.6485	0.1475	0.4615
23.9333	0.6685	0.157	0.4602
23.9667	0.6608	0.1487	0.4537
24	0.6786	0.1502	0.472
24.0333	0.6561	0.1528	0.4726
24.0667	0.6855	0.1527	0.4774
24.1	0.6715	0.1537	0.4872
24.1333	0.675	0.1485	0.4898
24.1667	0.6682	0.1528	0.4763
24.2	0.6895	0.1481	0.4752
24.2333	0.674	0.1497	0.4884
24.2667	0.6895	0.1517	0.4954
24.3	0.6909	0.1438	0.4857
24.3333	0.6926	0.1555	0.4659
24.3667	0.7002	0.1526	0.4858
24.4	0.6989	0.1572	0.4768
24.4333	0.6901	0.1552	0.4962
24.4667	0.6928	0.1493	0.4874
24.5	0.7055	0.1533	0.4789
24.5333	0.6966	0.1585	0.4906
24.5667	0.7038	0.1592	0.4878
24.6	0.6998	0.149	0.4843
24.6333	0.7072	0.1467	0.5107
24.6667	0.7117	0.1499	0.5075
24.7	0.7197	0.1442	0.4941
24.7333	0.7106	0.1512	0.5021
24.7667	0.7162	0.1599	0.501
24.8	0.7291	0.1564	0.5141
24.8333	0.7206	0.1558	0.4835
24.8667	0.7283	0.1534	0.5123
24.9	0.7217	0.1578	0.5139
24.9333	0.735	0.151	0.4973
24.9667	0.7309	0.1619	0.506
25	0.7347	0.1575	0.5215
25.0333	0.7353	0.1511	0.5087
25.0667	0.7269	0.1572	0.5247
25.1	0.748	0.1478	0.5168
25.1333	0.7477	0.1646	0.5244
25.1667	0.7464	0.1429	0.5206
25.2	0.7356	0.1507	0.5344
25.2333	0.7632	0.1407	0.5242
25.2667	0.7619	0.147	0.5222
25.3	0.7615	0.1508	0.5269
25.3333	0.7633	0.1553	0.5226
25.3667	0.7579	0.1511	0.5309
25.4	0.7682	0.1464	0.5455
25.4333	0.7642	0.1477	0.548
25.4667	0.7701	0.1466	0.5441
25.5	0.771	0.1483	0.5357
25.5333	0.7734	0.1558	0.5381
25.5667	0.7796	0.1463	0.5444
25.6	0.7756	0.1439	0.5463
25.6333	0.785	0.1542	0.5212
25.6667	0.7765	0.1563	0.531
25.7	0.7875	0.1491	0.5675
25.7333	0.7967	0.15	0.5575
25.7667	0.7843	0.1512	0.5489
25.8	0.787	0.1484	0.5686
25.8333	0.7993	0.1551	0.5499
25.8667	0.7996	0.155	0.5548
25.9	0.8025	0.1456	0.5568
25.9333	0.8066	0.1527	0.5551
25.9667	0.8007	0.1465	0.5512
26	0.8108	0.1532	0.5385
26.0333	0.8188	0.1616	0.5455
26.0667	0.8173	0.1387	0.5717
26.1	0.808	0.1437	0.5659
26.1333	0.8128	0.1633	0.5545
26.1667	0.8226	0.1552	0.5686
26.2	0.828	0.1456	0.5633
26.2333	0.829	0.1458	0.5678
26.2667	0.8327	0.1334	0.5584
26.3	0.8368	0.1426	0.5682
26.3333	0.8359	0.1489	0.5706
26.3667	0.8414	0.1373	0.5912
26.4	0.8365	0.1501	0.5823
26.4333	0.851	0.1433	0.5775
26.4667	0.8431	0.1367	0.5563
26.5	0.857	0.1466	0.5717
26.5333	0.8494	0.1401	0.5681
26.5667	0.8506	0.1497	0.6026
26.6	0.8629	0.1444	0.5907
26.6333	0.8542	0.1535	0.5806
26.6667	0.8578	0.1538	0.5865
26.7	0.861	0.1467	0.6024
26.7333	0.8689	0.1536	0.5959
26.7667	0.8667	0.1494	0.6053
26.8	0.8649	0.1554	0.5971
26.8333	0.8867	0.1575	0.6219
26.8667	0.8791	0.1455	0.606
26.9	0.8816	0.149	0.5968
26.9333	0.8924	0.1525	0.5862
26.9667	0.8898	0.1489	0.6047
27	0.8879	0.1392	0.6056
27.0333	0.8829	0.1448	0.5984
27.0667	0.8874	0.1395	0.6146
27.1	0.8869	0.1401	0.6218
27.1333	0.9012	0.1565	0.6133
27.1667	0.8961	0.135	0.6189
27.2	0.9073	0.1396	0.6316
27.2333	0.8916	0.1357	0.6269
27.2667	0.9161	0.1448	0.617
27.3	0.9125	0.1485	0.6386
27.3333	0.9258	0.145	0.6249
27.3667	0.9105	0.1404	0.634
27.4	0.9267	0.1486	0.6186
27.4333	0.9231	0.1387	0.6468
27.4667	0.9308	0.1353	0.6346
27.5	0.9284	0.139	0.6483
27.5333	0.9348	0.1468	0.6353
27.5667	0.9161	0.1496	0.6528
27.6	0.9372	0.1508	0.6349
27.6333	0.948	0.1446	0.6518
27.6667	0.9425	0.1372	0.6569
27.7	0.9469	0.148	0.6601
27.7333	0.9422	0.1455	0.6606
27.7667	0.9576	0.146	0.6336
27.8	0.9552	0.1498	0.6694
27.8333	0.9534	0.145	0.6658
27.8667	0.9501	0.1457	0.6607
27.9	0.9565	0.1334	0.6784
27.9333	0.9602	0.1442	0.663
27.9667	0.953	0.1487	0.6833
28	0.9832	0.1393	0.688
28.0333	0.968	0.1382	0.687
28.0667	0.9779	0.1492	0.6753
28.1	0.9844	0.1301	0.6805
28.1333	0.9823	0.1345	0.6928
28.1667	0.9802	0.1436	0.6892
28.2	0.9848	0.1361	0.6821
28.2333	0.9737	0.1319	0.6679
28.2667	0.9862	0.1334	0.6573
28.3	0.9854	0.1418	0.7038
28.3333	0.9947	0.1372	0.6841
28.3667	0.9961	0.1313	0.6836
28.4	1.0079	0.14	0.6837
28.4333	1.0032	0.1406	0.6774
28.4667	1.0038	0.1332	0.6984
28.5	1.0014	0.1438	0.6906
28.5333	1.0108	0.1411	0.7243
28.5667	1.0258	0.151	0.7128
28.6	1.0153	0.1435	0.7227
28.6333	1.0255	0.1351	0.7169
28.6667	1.0234	0.1427	0.6984
28.7	1.0356	0.144	0.7149
28.7333	1.0332	0.1312	0.7113
28.7667	1.0382	0.1421	0.717
28.8	1.0304	0.1364	0.7198
28.8333	1.0393	0.1448	0.6977
28.8667	1.0453	0.1353	0.7155
28.9	1.0456	0.1261	0.7071
28.9333	1.0562	0.1443	0.7188
28.9667	1.0493	0.1395	0.7444
29	1.0575	0.1468	0.7137
29.0333	1.0647	0.1365	0.7406
29.0667	1.0654	0.1235	0.7555
29.1	1.0565	0.1436	0.734
29.1333	1.059	0.1379	0.758
29.1667	1.0812	0.1472	0.7508
29.2	1.0822	0.1398	0.7501
29.2333	1.0898	0.1342	0.793
29.2667	1.0851	0.1392	0.7589
29.3	1.0789	0.1345	0.7617
29.3333	1.0779	0.1319	0.756
29.3667	1.0863	0.145	0.7418
29.4	1.0998	0.1343	0.7519
29.4333	1.0889	0.1449	0.7654
29.4667	1.113	0.1335	0.7676
29.5	1.0878	0.138	0.7531
29.5333	1.1125	0.1339	0.7762
29.5667	1.1238	0.15	0.7739
29.6	1.1287	0.1418	0.7896
29.6333	1.121	0.1388	0.7425
29.6667	1.1169	0.1359	0.7972
29.7	1.1217	0.1323	0.767
29.7333	1.1269	0.1442	0.8057
29.7667	1.1161	0.1389	0.7904
29.8	1.1245	0.1263	0.7975
29.8333	1.1356	0.1364	0.7729
29.8667	1.1358	0.1304	0.8052
29.9	1.1399	0.1359	0.7951
29.9333	1.1449	0.1389	0.7661
29.9667	1.154	0.1325	0.784
30	1.1474	0.1388	0.795
30.0333	1.1431	0.1376	0.8123
30.0667	1.1654	0.1413	0.7965
30.1	1.1621	0.1468	0.8038
30.1333	1.1772	0.1318	0.8059
30.1667	1.1534	0.1343	0.8332
30.2	1.1647	0.1243	0.8314
30.2333	1.1705	0.1277	0.8093
30.2667	1.1859	0.1407	0.8065
30.3	1.1748	0.1367	0.8328
30.3333	1.1883	0.1315	0.8255
30.3667	1.1839	0.1315	0.8056
30.4	1.1852	0.1265	0.8394
30.4333	1.1967	0.1373	0.8149
30.4667	1.1819	0.1333	0.8103
30.5	1.1826	0.1378	0.8476
30.5333	1.1871	0.1347	0.8379
30.5667	1.2	0.1262	0.8362
30.6	1.2163	0.1336	0.8448
30.6333	1.2031	0.1357	0.8465
30.6667	1.2294	0.1275	0.8379
30.7	1.2094	0.1411	0.8618
30.7333	1.1909	0.1164	0.8578
30.7667	1.2031	0.1357	0.8323
30.8	1.2404	0.1236	0.8513
30.8333	1.2197	0.1238	0.8729
30.8667	1.2372	0.1219	0.8701
30.9	1.2276	0.1311	0.8567
30.9333	1.2413	0.1262	0.8554
30.9667	1.229	0.1268	0.891
31	1.252	0.1418	0.8702
31.0333	1.2305	0.1281	0.8636
31.0667	1.2401	0.1326	0.8752
31.1	1.2601	0.1365	0.8613
31.1333	1.2601	0.1316	0.8887
31.1667	1.2569	0.1316	0.8745
31.2	1.2675	0.133	0.8839
31.2333	1.2585	0.1334	0.9049
31.2667	1.2701	0.1316	0.9237
31.3	1.2708	0.1381	0.9025
31.3333	1.2569	0.1322	0.9122
31.3667	1.2896	0.1318	0.9025
31.4	1.2877	0.1302	0.9051
31.4333	1.3039	0.1325	0.8922
31.4667	1.2882	0.1289	0.891
31.5	1.267	0.1349	0.9135
31.5333	1.2851	0.1263	0.9063
31.5667	1.2996	0.1204	0.8994
31.6	1.2971	0.1336	0.9198
31.6333	1.3127	0.1349	0.9231
31.6667	1.3119	0.1285	0.9188
31.7	1.2981	0.123	0.9343
31.7333	1.3029	0.1248	0.924
31.7667	1.3031	0.1224	0.927
31.8	1.2989	0.1273	0.9231
31.8333	1.3417	0.1288	0.9338
31.8667	1.3262	0.1227	0.9303
31.9	1.3146	0.1393	0.9408
31.9333	1.3315	0.1317	0.9371
31.9667	1.3285	0.1257	0.9457
32	1.3381	0.1236	0.9619
32.0333	1.339	0.1196	0.944
32.0667	1.3543	0.1261	0.9452
32.1	1.3566	0.1286	0.9586
32.1333	1.3592	0.1304	0.9467
32.1667	1.3718	0.1216	0.9534
32.2	1.3571	0.1303	0.9647
32.2333	1.3802	0.1322	0.9776
32.2667	1.3595	0.1159	0.9617
32.3	1.377	0.1265	0.9332
32.3333	1.393	0.129	0.9725
32.3667	1.3704	0.1187	0.9586
32.4	1.3907	0.124	1.0047
32.4333	1.384	0.1303	0.958
32.4667	1.3958	0.129	0.9633
32.5	1.3911	0.1196	0.9818
32.5333	1.395	0.1187	0.9864
32.5667	1.4146	0.1171	0.9769
32.6	1.3973	0.1233	0.997
32.6333	1.3799	0.1271	1.0214
32.6667	1.3949	0.1283	0.9911
32.7	1.4091	0.1235	1.0106
32.7333	1.4095	0.1157	1.0144
32.7667	1.4073	0.1231	1.0119
32.8	1.4095	0.1258	0.9883
32.8333	1.4047	0.1365	0.997
32.8667	1.4046	0.1191	0.9997
32.9	1.4463	0.1276	1.0064
32.9333	1.4417	0.129	1.0217
32.9667	1.4332	0.1151	0.9981
33	1.4483	0.1194	0.9937
33.0333	1.4386	0.1248	1.0297
33.0667	1.4444	0.1375	1.0078
33.1	1.4437	0.1244	1.0139
33.1333	1.4586	0.1299	1.0411
33.1667	1.4554	0.1196	1.0404
33.2	1.4543	0.1166	1.0331
33.2333	1.4626	0.1228	1.0293
33.2667	1.4917	0.1299	1.076
33.3	1.4823	0.1193	1.0367
33.3333	1.4597	0.1277	1.0226
33.3667	1.4819	0.1268	1.0205
33.4	1.4821	0.1243	1.0603
33.4333	1.4707	0.1205	1.025
33.4667	1.4833	0.1169	1.0336
33.5	1.5084	0.1155	1.0493
33.5333	1.4962	0.1245	1.0821
33.5667	1.4836	0.1206	1.0508
33.6	1.5119	0.1179	1.0651
33.6333	1.4931	0.1221	1.1014
33.6667	1.5023	0.118	1.0919
33.7	1.4899	0.1239	1.073
33.7333	1.5117	0.114	1.058
33.7667	1.5134	0.1129	1.1023
33.8	1.555	0.1205	1.0701
33.8333	1.5149	0.1187	1.081
33.8667	1.5277	0.1171	1.0838
33.9	1.5183	0.1166	1.0821
33.9333	1.5201	0.1182	1.1068
33.9667	1.5571	0.1123	1.1062
34	1.5498	0.1101	1.1151
34.0333	1.5258	0.1229	1.1254
34.0667	1.5315	0.1169	1.1076
34.1	1.5458	0.1176	1.1003
34.1333	1.55	0.1124	1.1123
34.1667	1.555	0.1196	1.1154
34.2	1.5533	0.1234	1.0843
34.2333	1.5719	0.1233	1.1111
34.2667	1.5634	0.1276	1.1003
34.3	1.5704	0.1144	1.1103
34.3333	1.5734	0.1213	1.108
34.3667	1.5835	0.1247	1.1439
34.4	1.5749	0.1136	1.1028
34.4333	1.5707	0.1099	1.1478
34.4667	1.5904	0.1146	1.1151
34.5	1.5621	0.1128	1.1196
34.5333	1.6115	0.1169	1.1302
34.5667	1.5774	0.1172	1.1888
34.6	1.6211	0.1155	1.1439
34.6333	1.5894	0.1278	1.1517
34.6667	1.6296	0.1219	1.1643
34.7	1.625	0.109	1.1541
34.7333	1.6242	0.1122	1.1359
34.7667	1.6153	0.1259	1.1387
34.8	1.6327	0.1163	1.1653
34.8333	1.6356	0.1103	1.1497
34.8667	1.6447	0.1213	1.151
34.9	1.6239	0.1088	1.1672
34.9333	1.6225	0.1129	1.1907
34.9667	1.6142	0.1144	1.1728
35	1.6755	0.1206	1.1548
35.0333	1.6242	0.118	1.1682
35.0667	1.6444	0.1157	1.1938
35.1	1.6467	0.1149	1.1602
35.1333	1.6353	0.1058	1.2031
35.1667	1.6714	0.1264	1.1817
35.2	1.6612	0.122	1.1993
35.2333	1.6683	0.1146	1.1659
35.2667	1.6456	0.1039	1.2258
35.3	1.647	0.1255	1.2053
35.3333	1.6858	0.1144	1.1934
35.3667	1.6721	0.1187	1.2194
35.4	1.6868	0.1146	1.1467
35.4333	1.6768	0.1155	1.2074
35.4667	1.6936	0.1108	1.2321
35.5	1.6774	0.1111	1.2236
35.5333	1.6993	0.1175	1.2231
35.5667	1.6858	0.1117	1.2104
35.6	1.7039	0.1146	1.2155
35.6333	1.7236	0.122	1.2162
35.6667	1.7066	0.1046	1.27
35.7	1.6949	0.1078	1.2191
35.7333	1.7339	0.1177	1.2148
35.7667	1.7169	0.1201	1.2194
35.8	1.7118	0.1118	1.229
35.8333	1.7451	0.1097	1.2188
35.8667	1.7328	0.1062	1.2678
35.9	1.7462	0.115	1.2653
35.9333	1.7169	0.1185	1.2197
35.9667	1.7525	0.1212	1.2469
36	1.7169	0.104	1.2328
36.0333	1.7522	0.1109	1.2686
36.0667	1.7422	0.1104	1.2799
36.1	1.7563	0.1034	1.2732
36.1333	1.7548	0.1146	1.2609
36.1667	1.7353	0.1097	1.2877
36.2	1.7563	0.1171	1.2625
36.2333	1.7681	0.1123	1.2822
36.2667	1.7837	0.1096	1.3142
36.3	1.7623	0.1126	1.2316
36.3333	1.7724	0.1068	1.2577
36.3667	1.7822	0.1106	1.2665
36.4	1.7608	0.103	1.2621
36.4333	1.8086	0.1133	1.2258
36.4667	1.7646	0.1192	1.2548
36.5	1.7778	0.1134	1.277
36.5333	1.8124	0.1004	1.2822
36.5667	1.7902	0.1197	1.3315
36.6	1.7926	0.1054	1.3094
36.6333	1.8103	0.1168	1.3231
36.6667	1.8437	0.104	1.2649
36.7	1.7979	0.1014	1.27
36.7333	1.8209	0.1113	1.336
36.7667	1.8028	0.1129	1.2637
36.8	1.802	0.1083	1.3022
36.8333	1.7841	0.1174	1.3015
36.8667	1.7593	0.1096	1.2757
36.9	1.831	0.1115	1.3202
36.9333	1.8611	0.0981	1.3286
36.9667	1.8396	0.1113	1.2609
37	1.8222	0.1062	1.2716
37.0333	1.8218	0.1063	1.3174
37.0667	1.8342	0.1124	1.3032
37.1	1.7995	0.1183	1.3272
37.1333	1.8103	0.1014	1.3202
37.1667	1.8328	0.1082	1.2934
37.2	1.8201	0.1055	1.337
37.2333	1.8451	0.1104	1.3503
37.2667	1.8446	0.1102	1.3282
37.3	1.8644	0.1161	1.3483
37.3333	1.8315	0.1051	1.3041
37.3667	1.8879	0.1023	1.3453
37.4	1.8858	0.1083	1.3364
37.4333	1.8587	0.1009	1.3235
37.4667	1.8905	0.1085	1.3423
37.5	1.8611	0.1211	1.2983
37.5333	1.9036	0.1116	1.335
37.5667	1.8688	0.1036	1.3379
37.6	1.8587	0.1087	1.3423
37.6333	1.8828	0.1069	1.3865
37.6667	1.89	0.1115	1.3503
37.7	1.8895	0.1077	1.3641
37.7333	1.8947	0.0986	1.3389
37.7667	1.8808	0.1061	1.3188
37.8	1.8864	0.0988	1.3503
37.8333	1.892	0.1149	1.3321
37.8667	1.8693	0.1012	1.3751
37.9	1.8792	0.107	1.373
37.9333	1.9112	0.1134	1.3434
37.9667	1.9324	0.1158	1.3626
38	1.8843	0.0987	1.3849
38.0333	1.9194	0.113	1.3987
38.0667	1.9399	0.1029	1.4124
38.1	1.8973	0.1051	1.3569
38.1333	1.8864	0.0974	1.3595
38.1667	1.9112	0.1125	1.4235
38.2	1.9079	0.1181	1.3904
38.2333	1.9047	0.1061	1.4066
38.2667	1.9381	0.1075	1.4373
38.3	1.9085	0.1161	1.4373
38.3333	1.9324	0.1102	1.3423
38.3667	1.9189	0.1016	1.3904
38.4	1.9004	0.1028	1.3679
38.4333	1.9352	0.0948	1.3987
38.4667	1.9278	0.101	1.3893
38.5	1.9267	0.0947	1.4112
38.5333	1.9481	0.1027	1.3842
38.5667	1.9434	0.1062	1.438
38.6	1.9117	0.0969	1.3816
38.6333	1.9364	0.0933	1.3953
38.6667	1.9233	0.104	1.3816
38.7	1.9505	0.1008	1.3595
38.7333	1.9261	0.1082	1.387
38.7667	1.9632	0.1059	1.4584
38.8	1.9517	0.1124	1.3993
38.8333	1.9399	0.1047	1.4605
38.8667	1.9481	0.1106	1.4054
38.9	1.9632	0.1055	1.4472
38.9333	1.9458	0.1004	1.401
38.9667	1.9814	0.1192	1.398
39	1.9535	0.1128	1.4373
39.0333	1.9885	0.1091	1.4119
39.0667	1.9751	0.105	1.3947
39.1	1.9553	0.1069	1.4362
39.1333	2.0084	0.1033	1.4701
39.1667	1.982	0.1059	1.3904
39.2	1.982	0.0995	1.476
39.2333	1.997	0.0887	1.4027
39.2667	1.9663	0.1189	1.3595
39.3	1.9713	0.1062	1.41
39.3333	2.0699	0.1024	1.4037
39.3667	1.9801	0.1032	1.4027
39.4	1.997	0.0989	1.476
39.4333	1.9719	0.0961	1.4713
39.4667	1.9852	0.0915	1.4288
39.5	1.9669	0.0997	1.4066
39.5333	1.9904	0.1082	1.3821
39.5667	1.9732	0.1014	1.4124
39.6	1.9763	0.0972	1.4248
39.6333	1.9738	0.0974	1.4129
39.6667	2.0077	0.1003	1.4662
39.7	1.9744	0.1049	1.4373
39.7333	2.054	0.1102	1.4571
39.7667	2.0364	0.1082	1.4015
39.8	2.0314	0.1062	1.5124
39.8333	2.0017	0.0983	1.4153
39.8667	2.0111	0.1079	1.4927
39.9	2.0064	0.1085	1.4509
39.9333	2.0098	0.1018	1.4649
39.9667	2.0222	0.0927	1.4773
40	2.0153	0.0948	1.4953
40.0333	2.0593	0.1021	1.4565
40.0667	2.0451	0.1043	1.4522
40.1	2.0278	0.0987	1.4682
40.1333	2.0623	0.1086	1.4312
40.1667	2.0139	0.0961	1.4915
40.2	2.0111	0.1063	1.4415
40.2333	2.0653	0.0954	1.4095
40.2667	2.0444	0.1037	1.4153
40.3	2.0578	0.0974	1.4301
40.3333	2.0111	0.1046	1.4485
40.3667	2.0436	0.0963	1.4552
40.4	2.0762	0.1187	1.4713
40.4333	2.0646	0.093	1.4546
40.4667	2.051	0.1062	1.4176
40.5	2.0864	0.1044	1.4649
40.5333	2.054	0.099	1.4485
40.5667	2.0872	0.1006	1.4793
40.6	2.0777	0.1129	1.4655
40.6333	2.0292	0.0888	1.4362
40.6667	2.0623	0.1032	1.4901
40.7	2.0785	0.0947	1.4962
40.7333	2.0585	0.1204	1.4528
40.7667	2.0444	0.1009	1.4404
40.8	2.116	0.1013	1.4779
40.8333	2.0415	0.1025	1.4611
40.8667	2.0692	0.1091	1.4422
40.9	2.0378	0.1007	1.4509
40.9333	2.0785	0.1037	1.4819
40.9667	2.0904	0.1037	1.4839
41	2.0738	0.0988	1.4947
41.0333	2.1026	0.0993	1.4141
41.0667	2.0888	0.0956	1.4881
41.1	2.1246	0.1039	1.4446
41.1333	2.0936	0.1048	1.4688
41.1667	2.0723	0.0985	1.4854
41.2	2.1317	0.1055	1.5231
41.2333	2.073	0.0994	1.4193
41.2667	2.0912	0.1007	1.4398
41.3	2.0833	0.1044	1.5194
41.3333	2.0817	0.1039	1.4409
41.3667	2.1093	0.0945	1.5124
41.4	2.1489	0.1033	1.4722
41.4333	2.0896	0.1007	1.4819
41.4667	2.1118	0.1001	1.4974
41.5	2.1002	0.1038	1.4935
41.5333	2.1564	0.093	1.4459
41.5667	2.101	0.1052	1.4962
41.6	2.1397	0.1117	1.4271
41.6333	2.1352	0.0904	1.4839
41.6667	2.1335	0.1085	1.4624
41.7	2.1255	0.0929	1.4288
41.7333	2.1068	0.1023	1.4974
41.7667	2.168	0.1129	1.4968
41.8	2.0888	0.1042	1.5017
41.8333	2.0985	0.1018	1.4915
41.8667	2.1962	0.0952	1.5421
41.9	2.1093	0.1001	1.4813
41.9333	2.1118	0.1043	1.4713
41.9667	2.0707	0.1096	1.4748
42	2.1135	0.0976	1.4767
42.0333	2.111	0.1008	1.5145
42.0667	2.1397	0.1031	1.4373
42.1	2.1238	0.102	1.401
42.1333	2.1593	0.1015	1.3947
42.1667	2.148	0.0934	1.476
42.2	2.1084	0.0954	1.4713
42.2333	2.166	0.1006	1.4446
42.2667	2.1397	0.0979	1.4655
42.3	2.191	0.1032	1.4503
42.3333	2.19	0.1125	1.4854
42.3667	2.1508	0.0948	1.4428
42.4	2.1238	0.0899	1.5246
42.4333	2.1443	0.1069	1.463
42.4667	2.137	0.1001	1.3963
42.5	2.1317	0.0939	1.5124
42.5333	2.191	0.1025	1.4464
42.5667	2.1612	0.1021	1.4875
42.6	2.1246	0.103	1.5306
42.6333	2.1536	0.1056	1.4176
42.6667	2.1264	0.1181	1.4386
42.7	2.2244	0.0924	1.4674
42.7333	2.1545	0.0987	1.4571
42.7667	2.1452	0.1106	1.4813
42.8	2.1593	0.1059	1.4288
42.8333	2.1602	0.0993	1.5073
42.8667	2.1931	0.1003	1.4164
42.9	2.1425	0.108	1.4618
42.9333	2.1994	0.0956	1.4793
42.9667	2.1602	0.0978	1.4032
43	2.1983	0.0924	1.4451
43.0333	2.1593	0.0901	1.474
43.0667	2.2005	0.1032	1.4528
43.1	2.1407	0.1029	1.4136
43.1333	2.1452	0.0999	1.4565
43.1667	2.1729	0.1029	1.4146
43.2	2.1641	0.0943	1.3768
43.2333	2.1738	0.1083	1.476
43.2667	2.1778	0.0968	1.4193
43.3	2.1317	0.093	1.4479
43.3333	2.19	0.0891	1.4451
43.3667	2.168	0.0952	1.4283
43.4	2.2451	0.1132	1.4907
43.4333	2.1962	0.0992	1.4105
43.4667	2.1631	0.1022	1.4618
43.5	2.1778	0.0918	1.4235
43.5333	2.1729	0.1025	1.4235
43.5667	2.1829	0.1078	1.4119
43.6	2.1973	0.1018	1.4271
43.6333	2.1808	0.1006	1.4368
43.6667	2.1527	0.0974	1.4398
43.7	2.1921	0.0966	1.4404
43.7333	2.1738	0.1045	1.476
43.7667	2.1699	0.0949	1.4146
43.8	2.2166	0.112	1.433
43.8333	2.2267	0.1036	1.3942
43.8667	2.1962	0.0987	1.5067
43.9	2.1471	0.0977	1.4713
43.9333	2.2619	0.1028	1.4153
43.9667	2.1819	0.0949	1.4728
44	2.2068	0.0997	1.4342
44.0333	2.2177	0.1026	1.4342
44.0667	2.1729	0.0958	1.4787
44.1	2.2267	0.1109	1.4005
44.1333	2.2211	0.0965	1.4446
44.1667	2.1952	0.1045	1.4164
44.2	2.2026	0.0988	1.4324
44.2333	2.1942	0.0924	1.4193
44.2667	2.189	0.096	1.3853
44.3	2.1758	0.0958	1.4258
44.3333	2.19	0.0889	1.4728
44.3667	2.2211	0.0939	1.4485
44.4	2.1942	0.1097	1.3999
44.4333	2.2358	0.1028	1.3805
44.4667	2.167	0.1036	1.4386
44.5	2.1397	0.0929	1.4552
44.5333	2.1808	0.0918	1.449
44.5667	2.1994	0.0983	1.4141
44.6	2.2233	0.0949	1.4514
44.6333	2.2058	0.1057	1.4624
44.6667	2.1545	0.0895	1.4446
44.7	2.2101	0.0981	1.4083
44.7333	2.1593	0.0989	1.4693
44.7667	2.1808	0.091	1.3963
44.8	2.19	0.0957	1.3987
44.8333	2.2522	0.0944	1.3755
44.8667	2.1748	0.1056	1.4171
44.9	2.2015	0.1049	1.4571
44.9333	2.1798	0.0936	1.4446
44.9667	2.1983	0.0933	1.4459
45	2.1758	0.0964	1.4362
45.0333	2.1593	0.0951	1.3987
45.0667	2.2015	0.0987	1.4221
45.1	2.22	0.0897	1.4404
45.1333	2.2267	0.103	1.3958
45.1667	2.1798	0.0907	1.4624
45.2	2.2134	0.0903	1.4049
45.2333	2.1397	0.0948	1.4317
45.2667	2.166	0.0996	1.444
45.3	2.1574	0.0868	1.4027
45.3333	2.2222	0.1133	1.4061
45.3667	2.3109	0.0946	1.4105
45.4	2.2026	0.0908	1.4124
45.4333	2.1859	0.0971	1.3849
45.4667	2.1962	0.0976	1.4248
45.5	2.23	0.1007	1.4446
45.5333	2.2177	0.1039	1.3235
45.5667	2.165	0.089	1.4509
45.6	2.167	0.09	1.402
45.6333	2.1962	0.092	1.4845
45.6667	2.2267	0.1016	1.4141
45.7	2.2244	0.0898	1.4546
45.7333	2.2474	0.0988	1.4061
45.7667	2.166	0.1018	1.4565
45.8	2.2522	0.0936	1.4015
45.8333	2.191	0.0829	1.4283
45.8667	2.1973	0.097	1.3832
45.9	2.2058	0.0991	1.4693
45.9333	2.2233	0.0836	1.4907
45.9667	2.2346	0.0997	1.4306
46	2.2312	0.0968	1.4146
46.0333	2.1489	0.1012	1.3679
46.0667	2.2255	0.0891	1.4205
46.1	2.2155	0.0949	1.387
46.1333	2.2211	0.0903	1.3853
46.1667	2.2036	0.0896	1.3589
46.2	2.1593	0.1003	1.41
46.2333	2.2177	0.0901	1.4317
46.2667	2.1631	0.0975	1.363
46.3	2.2188	0.0931	1.4078
46.3333	2.1942	0.1012	1.4386
46.3667	2.22	0.0945	1.3679
46.4	2.2026	0.0975	1.4301
46.4333	2.1738	0.0973	1.3735
46.4667	2.2462	0.0827	1.3751
46.5	2.1631	0.0966	1.4032
46.5333	2.1994	0.0922	1.3751
46.5667	2.2058	0.0967	1.3909
46.6	2.2144	0.094	1.3779
46.6333	2.2486	0.0982	1.3694
46.6667	2.2177	0.0883	1.4171
46.7	2.1839	0.0812	1.3719
46.7333	2.2323	0.103	1.4141
46.7667	2.1555	0.0845	1.402
46.8	2.2312	0.0885	1.4235
46.8333	2.2255	0.0918	1.3751
46.8667	2.2015	0.086	1.4066
46.9	2.1962	0.101	1.3569
46.9333	2.19	0.0948	1.4119
46.9667	2.1748	0.0946	1.4027
47	2.2058	0.0861	1.4176
47.0333	2.2166	0.0869	1.4044
47.0667	2.168	0.0917	1.3842
47.1	2.2462	0.0841	1.3779
47.1333	2.1921	0.0822	1.398
47.1667	2.1461	0.0913	1.3513
47.2	2.1921	0.0852	1.3779
47.2333	2.191	0.0813	1.3719
47.2667	2.165	0.088	1.3528
47.3	2.2058	0.0806	1.4368
47.3333	2.2058	0.0965	1.3473
47.3667	2.1574	0.1003	1.3779
47.4	2.2101	0.0857	1.4071
47.4333	2.2474	0.0787	1.4409
47.4667	2.23	0.0974	1.3355
47.5	2.1631	0.0896	1.3254
47.5333	2.166	0.0876	1.3537
47.5667	2.1931	0.094	1.41
47.6	2.1425	0.085	1.4146
47.6333	2.2101	0.0848	1.3458
47.6667	2.1829	0.0942	1.4049
47.7	2.1612	0.0948	1.3925
47.7333	2.2101	0.0894	1.3549
47.7667	2.2122	0.0888	1.3672
47.8	2.1689	0.0899	1.36
47.8333	2.2392	0.0916	1.3528
47.8667	2.2101	0.0856	1.3374
47.9	2.1729	0.0965	1.3528
47.9333	2.1335	0.0876	1.3663
47.9667	2.2188	0.0919	1.3925
48	2.2427	0.0891	1.3503
48.0333	2.2267	0.0781	1.3554
48.0667	2.129	0.0985	1.401
48.1	2.1699	0.085	1.3072
48.1333	2.2068	0.0886	1.3795
48.1667	2.1602	0.0921	1.3865
48.2	2.1952	0.0875	1.392
48.2333	2.1461	0.0921	1.3899
48.2667	2.1612	0.0876	1.3374
48.3	2.2244	0.0896	1.3423
48.3333	2.2392	0.0818
48.3667	2.1641	0.1013
48.4	2.1545	0.0876
48.4333	2.1808	0.0858
48.4667	2.1593	0.0882
48.5	2.1758	0.0824
48.5333	2.1498	0.0895
48.5667	2.129	0.0699
48.6	2.1545	0.0988
48.6333	2.1536	0.0881
48.6667	2.1434	0.0814
48.7	2.2005	0.0852
48.7333	2.1699	0.0832
48.7667	2.1869	0.0878
48.8	2.167	0.0843
48.8333	2.1719	0.0842
48.8667	2.1719	0.0824
48.9	2.1962	0.0806
48.9333	2.1983	0.0919
48.9667	2.1729	0.0824
49	2.1962	0.0863
49.0333	2.1545	0.0796
49.0667	2.1425	0.0971
49.1	2.1729	0.0865
49.1333	2.1758	0.0846
49.1667	2.1143	0.0816
49.2	2.1942	0.0774
49.2333	2.1143	0.0916
49.2667	2.1536	0.0766
49.3	2.1631	0.0854
49.3333	2.1452	0.0942
49.3667	2.1758	0.0953
49.4	2.1689	0.0838
49.4333	2.168	0.0711
49.4667	2.1699	0.081
49.5	2.168	0.087
49.5333	2.2166	0.0818
49.5667	2.189	0.0848
49.6	2.1641	0.0796
49.6333	2.1407	0.0795
49.6667	2.1461	0.0827
49.7	2.1229	0.0891
49.7333	2.1808	0.0764
49.7667	2.1308	0.0757
49.8	2.1612	0.0797
49.8333	2.1593	0.086
49.8667	2.1335	0.0804
49.9	2.2122	0.0875
49.9333	2.1819	0.0815
49.9667	2.1778	0.0745
50	2.1317	0.0827
