# Supplementary material for: Pyruvate:ferredoxin oxidoreductase and low abundant ferredoxins support aerobic photomixotrophic growth in cyanobacteria
Source: eLife journal article supplement (doi:10.7554/elife.71339), 2022-02-09
Supplement: supp [file elife_poa_e71339_Figure_3_figure_supplement_2_source_data_1.xlsx]

## Sheet: Sheet1
		201610
			WT	fx2/△fx2	△fx3	△fx4	△fx6	△pfor		stdev	WT	fx2/△fx2	△ fx3	△ fx4	△ fx6	△nifJ
		1	0.0588333	0.0572222	0.0533333	0.0561111	0.0546667	0.0532083		D1	0.00145297	0.00107152	0.000881917	0.00101835	0.000666667	0.000712
		2	0.117417	0.103667	0.0981111	0.104889	0.107444	0.0943333		D2	0.00395694	0.00296273	0.00283497	0.00252396	0.00214303	0.00246456
		3	0.394667	0.361667	0.328667	0.359222	0.360333	0.273083		D3	0.0011547	0.0128106	0.00581187	0.0201172	0.00470225	0.00321311
		4	0.664167	0.617778	0.596667	0.605556	0.601111	0.515833		D4	0.00384298	0.00309719	0.00384419	0.00548061	0.00101835	0.00170783
		5	0.9625	0.882222	0.875556	0.893333	0.847778	0.778333		D5	0.00275379	0.0070422	0.00422076	0.00983757	0.00167774	0.0019341
		6	1.43167	1.24222	1.27222	1.35	1.25667	1.225		D6	0.062	0.00975439	0.00790452	0.0181138	0.0031798	0.00491784
		7	1.905	1.76	1.75889	1.75	1.76556	1.755		D7	0.054	0.0141774	0.019164	0.0225019	0.00258915	0.0106823
		8	2.79333	2.41167		2.48889	2.38667	2.555		D8		0.0189304		0.0203861		0.0133569
		9	3.84667	3.24056		3.08444	2.93667	3.3925		D9		0.0329226		0.0406917		0.0404341
		201611
			WT	△fx9	△fx9△isiB	△isiB				stdev	WT	△ fx9	△fx9△isiB	△ isiB
		1	0.0510833	0.0548889	0.0545556	0.0542222				D1	0.00063099	0.00019245	0.00234126	0.00138778
		2	0.09825	0.0986667	0.119778	0.115556				D2	0.0103829	0.00145297	0.00562073	0.00316813
		3	0.396917	0.347444	0.389222	0.400889				D3	0.0208813	0.0187093	0.00564046	0.0170761
		4	0.6825	0.551111	0.628889	0.673333				D4	0.045328	0.0214303	0.021688	0.0145297
		5	1.10333	0.874444	1.03	1.07556				D5	0.0484195	0.051783	0.0152753	0.0302459
		6	1.62	1.38333	1.53556	1.64111				D6	0.1	0.093	0.00509175	0.081944
		7	2.16222	1.86	2.1	2.43222				D7	0.12	0.0824264	0.085	0.0707369
		8	2.79417	2.36167	2.79111	2.98444				D8	0.124	0.0824958	0.089	0.0655179
		20161120
			WT	fx5/△fx5	△fx7	△fx7△fx9				stdev	WT	fx5/△fx5	△fx7	△fx7△fx9	△isiB	△nifJ
		1	0.0741667	0.0748889	0.0746667	0.0711111				D1	0.00145297	0.00150308	0.00145297	0.00234126	0.00236487	0.00488763
		2	0.203583	0.202667	0.199778	0.124222				D2	0.00554694	0.00352767	0.00542969	0.00455013	0.00397678	0.0278694
		3	0.506167	0.503889	0.515889	0.433				D3	0.0133347	0.0205868	0.0137531	0.011392	0.0267838	0.032168
		4	0.876667	0.825556	0.794444	0.77				D4	0.0360555	0.007698	0.0368681	0.0371184	0.00942809	0.0781262
		5	1.08778	1.05111	1.11833	0.903333				D5	0.047881	0.0183586	0.00707107	0.0584047	0.0235702	0.0542969
		6	1.62222	1.61444	1.68167	1.40444				D6	0.0846644	0.0467063	0.117851	0.0745604	0.0494975	0.0433333
		7	2.27111	2.25167	2.27333	1.98889				D7	0.0935099	0.0777817	0.141421	0.118806	0.0966379	0.0655179
