# Supplementary material for: Pyruvate:ferredoxin oxidoreductase and low abundant ferredoxins support aerobic photomixotrophic growth in cyanobacteria
Source: eLife. 2022 Feb 9;11:e71339. doi: 10.7554/eLife.71339 (PMC8887894; doi:10.7554/eLife.71339)
Supplement: Supplementary file 1. — (a) List of primers used in this study to generate deletion strains and for RT-PCR. (b) List of Synechocystis strains and mutants used in this study. [file elife-71339-supp1.docx]

Supplementary Information

Pyruvate:ferredoxin oxidoreductase and low abundant ferredoxins support aerobic photomixotrophic growth in cyanobacteria

Yingying Wanga, Xi Chena, Katharina Spenglera, Karoline Terbergera, Marko Boehma,b, Jens Appela,b, Thomas Barskec, Stefan Timmc, Natalia Battchikovad, Martin Hagemannc, Kirstin Gutekunsta,b

kirstin.gutekunst@uni-kassel.de

aDepartment of Biology, Botanical Institute, Christian-Albrechts-University, D-24118 Kiel, Germany; bDepartment of Molecular Plant Physiology, Bioenergetics in Photoautotrophs, University of Kassel, D-34132 Kassel, Germany, cPlant Physiology Department, University of Rostock, D-18059 Rostock, Germany, dDepartment of Biochemistry, Molecular Plant Biology, University of Turku, FI-20014 Turku, Finnland

Supplementary File 1a: List of primers used in this study to generate deletion strains and for RT-PCR

Supplementary File 1b: List of *Synechocystis* strains and mutants used in this study

Supplementary File 1a: List of primers used in this study to generate deletion strains and for RT-PCR.

| Primer name | Sequence | Fragment amplified | Construct |
| --- | --- | --- | --- |
| pfor-1 | TGGGCTATCTCTTTCCCCGG | upstream recombination-site | Deletion of *pfor* (*sll0741*) |
| pforin1 | ATCTAATTTCTTTTTTCGTCGACAAGGGGTGATGGGATAAATGG |
| Em1 | GTCGACGAAAAAAGAAATTAGATAAA | Em-cassette |
| Em2 | GTCGACTTACTTATTAAATAATTTATAGC |
| pforin2 | AATTATTTAATAAGTAAGTCGACGGTCTATTCGGAAAATCGCTTT | downstream recombination-site |
| pfor-2 | ATTTTTGGTATTCATCTGAGTG |
| Fdx1.1 | CCGGTCCTTAAAACTCCCTT | upstream recombination site | Deletion of *fx1 (ssl0020)* |
| Fdx1in1 | TTGGCACCCAGCCTGCGCGAACAGTAGAGAGATTGCCTCAT |
| Sp-KG | TCGCGCAGGCTGGGTGCCAA | Sp-cassette |
| Sp-rev | GCCCTCGCTAGATTTTAATGCGGAT |
| Fdx1in2 | ATCCGCATTAAAATCTAGCGAGGGCGGTAATAATGCTGGCCATGG | downstream recombination site |
| Fdx1.2 | TTAATCTACCCTTCGTTTCCC |
| Fdx2.1 | CTCTCATATTCCGACCTACC | upstream recombination site | Deletion of *fx2 (sll1382)* |
| Fdx2in1 | ATCAGAGATTTTGAGACACAACGTGGTTATGGGCTGGTTTGAATCCA |
| Km1 | ccacgttgtgtctcaaaatctctgat | Km-cassette |
| Km2 | ATCGCCCCATCATCCAGCCAGAAAG |
| Fdx2in2 | CTTTCTGGCTGGATGATGGGGCGATGTAGGCTACAACTACAACCTG | downstream recombination site |
| Fdx2.2 | TCTGGGCAACGGCGTTTAAT |
| Fdx3.1 | CGTCTGCCGTACTGTTAGAT | upstream recombination site | Deletion of *fx3 (slr1828)* |
| Fdx3in1 | AGAGATTTATCTAATTTCTTTTTTCGTCGACCCATGGCAAAGCGGTAATAA |
| Em1 | GTCGACGAAAAAAGAAATTAGATAAA | Em-cassette |
| Em2 | GTCGACTTACTTATTAAATAATTTATAGC |
| Fdx3in2 | GCTATAAATTATTTAATAAGTAAGTCGACTTCGGCTGGAATTCTCCCTT | downstream recombination site |
| Fdx3.2 | GCAAAGACTCAAAGGACTGG |
| Fdx4.1 | CAATTACAGCCATCCTGTTTG | upstream recombination site | Deletion of *fx4 (slr0150)* |
| Fdx4in1 | TCAATAATATCGAATTCCTGCAGGAATGACCCAAACAATGGACT |
| Cm1 | CTGCAGGAATTCGATATTATTG | Cm-cassette |
| Cm2 | AAGCTTGATGGCGGCACCTCGCT |
| Fdx4in2 | AGCGAGGTGCCGCCATCAAGCTTAATGTTAGTCCAGCGGAGTT | downstream recombination site |
| Fdx4.2 | TTAGCAGGCAAGACCACACT |
| Fdx5.1 | CGATTCAGAACTCGGCATTG | upstream recombination site | Deletion of *fx5 (slr0148)* |
| Fdx5in1 | ATCAGAGATTTTGAGACACAACGTGGCATAATGGTGGCATGGTCATG |
| Km1 | ccacgttgtgtctcaaaatctctgat | Km-cassette |
| Km2 | ATCGCCCCATCATCCAGCCAGAAAG |
| Fdx5in2 | CTTTCTGGCTGGATGATGGGGCGATCGTTGACTCGTCTCACCATTG | downstream recombination site |
| Fdx5.2 | TCAGTGCTGGTAACACCATGG |
| Fdx6.1 | TTCTCCACGCAGTTGGTGAC | upstream recombination site | Deletion of *fx6* (*ssl2559*) |
| Fdx6in1 | GGTTCGTGCCTTCATCCGTCGACACCAGCATGGTATGGCGATC |
| Gm1 | GTCGACGGATGAAGGCACGAACC | Gm-cassette |
| Gm2 | GTCGACCGAATTGTTAGGTGGCG |
| Fdx6in2 | CGCCACCTAACAATTCGGTCGACTTGTCCGATGGAACCTAAGC | downstream recombination site |
| Fdx6.2 | AAGCTCTGGACGCCATTACC |
| Fdx7.1 | CCGTACTTAATGAATCGGCC | upstream recombination site | Deletion of *fx7 (Sll0662)* |
| Fdx7in1 | TTGGCACCCAGCCTGCGCGACAGGCACTCCAGCGTTGCAC |
| Sp-KG | TCGCGCAGGCTGGGTGCCAA | Sp-cassette |
| Sp-rev | GCCCTCGCTAGATTTTAATGCGGAT |
| Fdx7in2 | ATCCGCATTAAAATCTAGCGAGGGCTTAATTGGGTGATGGAATCT | downstream recombination site |
| Fdx7.2 | CTGAGTAGATTAATGTGGAC |
| Fdx8.1 | CGTTGGCTAGCATGTCACTG | upstream recombination site | Deletion of *fx8 (ssr3184)* |
| Fdx8in1 | TCAATAATATCGAATTCCTGCAGTAAGGGTAGCGGACGTTCAA |
| Cm1 | CTGCAGGAATTCGATATTATTG | Cm-cassette |
| Cm2 | AAGCTTGATGGCGGCACCTCGCT |
| Fdx8in2 | AGCGAGGTGCCGCCATCAAGCTTGGTTGGGAGGGGTCTAACTG | downstream recombination site |
| Fdx8.2 | CTCTGCCACTGTTAGGCTGC |
| Fdx9.1 | CGGAGGGGGAAACGGAAGAA | upstream recombination site | Deletion of *fx9 (slr2059)* |
| Fdx9in1 | ATCAGAGATTTTGAGACACAACGTGGGGCATTTGCACCGCACTACG |
| Km1 | ccacgttgtgtctcaaaatctctgat | Km-cassette |
| Km2 | ATCGCCCCATCATCCAGCCAGAAAG |
| Fdx9in2 | CTTTCTGGCTGGATGATGGGGCGATCATCTTTGCCGACTCCGCCA | downstream recombination site |
| Fdx9.2 | AATTCCAAAATAAATACCCC |
| isiB1 | ATGGATCATCCTCACACTTG | upstream recombination site | Deletion of flavodoxin (*isiB, sll0284*) |
| isiBin1 | GGTTCGTGCCTTCATCCGTCGACGATTACTGGAAAGTTACTAAGC |
| Gm1 | GTCGACGGATGAAGGCACGAACC | Gm-cassette |
| Gm2 | GTCGACCGAATTGTTAGGTGGCG |
| isiBin2 | CGCCACCTAACAATTCGGTCGACGCAATCCTAGGTAACCTAAG | downstream recombination site |
| isiB2 | CTGGTTTGTCATGGTAGGAG |
| pdhA1 | CAGGCGATCGCGTAACCGTTG | upstream recombination site | Deletion of *pdhA* (*slr1934*) |
| pdhAin1 | TTGGCACCCAGCCTGCGCGATCTATGCGAAGTCGGTCAGC |
| Sp-KG | TCGCGCAGGCTGGGTGCCAA | Sp-cassette |
| Sp-rev | GCCCTCGCTAGATTTTAATGCGGAT |
| pdhAin2 | ATCCGCATTAAAATCTAGCGAGGGCACGTTCACCGTTTGGGAGAA | downstream recombination site |
| pdhA2 | GACACCCAACCGCTAATGGA |
| NGOGATout1 | CTATAGGGCGAATTGGGTACCCAACTGAATTGCTTGGTGTTGT | upstream recombination site | Deletion of NADH-dependent GOGAT (*sll1502*) |
| NGOGATin1 | GGTTCGTGCCTTCATCCGTCGACGACCTTCGTGGCAGGGCAT |
| Gm1 | GTCGACGGATGAAGGCACGAACC | Gm-cassette |
| Gm2 | GTCGACGAATTGTTAGGTGGCG |
| NGOGATin2 | cgccacctaacaattcggtcgacGCGGCGTTTGAGGAGAAT | downstream recombination site |
| NGOGATout2 | AGGGAACAAAAGCTGGAGCT ATAGGTTGCAAACTTCATTAGCTA |
| FGOGATout1 | CTATAGGGCGAATTGGGTAC ACCATCAGGCTGGGCAATTTTGTT | upstream recombination site | Deletion of ferredoxin-dependent GOGAT (*sll1499*) |
| FGOGATin1 | TTGGCACCCAGCCTGCGCGA GTGGCAACAGAGGAGTTTGTCATA |
| Sp-KG | TCGCGCAGGCTGGGTGCCAA | Sp-cassette |
| Sp-rev | GCCCTCGCTAGATTTTAATGCGGAT |
| FGOGATin2 | ATCCGCATTAAAATCTAGCGAGGGC AGAAGACACTGACCTCTGTCTA | downstream recombination site |
| FGOGATout2 | AGGGAACAAAAGCTGGAGCT ACCGCAGGGACATTATGGGCTTA |
| pfor-tag1 | AGACCGTGTGCGAGCCAGCAAAGGGCCGATAGA | primer for RT-reaction | RT-PCR |
| pfor-tag2 | AGACCGTGTGCGAGCCAGCAA | primers for PCR |
| pfor-r | AACAATTTGGCCAGCTAACCGG |
| pdhA-tag1 | AGACCGTGTGCGACACGGGAATCCCTTCCCCAT | primer for RT-reaction |
| pdhA-tag2 | AGACCGTGTGCGACACGGGAAT | primers for PCR |
| pdhA-rev | TTACGTTTGCAGTACCTATCGA |
| rnpB-tag1 | AGACCGTGTGCGACACCAATCATGGGGCAGGAA | primer for RT-reaction |
| rnpB-tag2 | AGACCGTGTGCGACACCAATCA | primers for PCR |
| ndhD1out1 | CTATAGGGCGAATTGGGTACGACTATCTGGGTAGTATGAACACTT | upstream recombination site | pD1  Deletion of *ndhD1* (*slr0331*) |
| ndhD1in1 | ATCAGAGATTTTGAGACACAACGTGGGGTGGTGATAAAACCGGTGAGAA |
| Km1 | ccacgttgtgtctcaaaatctctgat | Km-cassette |
| Km2 | ATCGCCCCATCATCCAGCCAGAAAG |
| ndhD1in2 | CTTTCTGGCTGGATGATGGGGCGATGACCCCCATTTATCTACTCTCCAT | downstream recombination site |
| ndhD1out2 | AGGGAACAAAAGCTGGAGCTTTCTTGGTCGACTTAAAAACCAAT |
| ndhD2out1 | CTATAGGGCGAATTGGGTACCAGGCGGCATAGTCTTCGGAAAA | upstream recombination site | pD2  Deletion of *ndhD2* (*slr1291*) |
| ndhD2in1 | tcaataatatcgaaTTCCTGCAGAGTGTTCCAACATGGTAATAAGAA |
| Cm1 | CTGCAGGAATTCGATATTATTG | Cm-cassette |
| Cm2 | AAGCTTGATGGCGGCACCTCGCT |
| ndhD2in2 | AGCGAGGTGCCGCCATCAAGCTTTCAAAGTTCAACCCTAGTGATCTA | downstream recombination site |
| ndhD2out2 | AGGGAACAAAAGCTGGAGCTAACCGATGCCCACACCGGTCTGATT |

Supplementary File 1b: Liste of *Synechocystis* strains and mutants used in this study.

| Strain | Marker of genotype | *Synechocystis* WT background | Reference |
| --- | --- | --- | --- |
| WT |  | non-motile GT strain | Trautmann et al. 2012 |
| fx2/Δfx2 | sll1382::kmR | non-motile GT strain | Gutekunst et al. 2014 |
| Δfx3* | slr1828::emR | non-motile GT strain | Gutekunst et al. 2014 |
| Δfx4* | slr0150::cmR | non-motile GT strain | Gutekunst et al. 2014  *please note that the names of fx3 and fx4 are exchanged in Gutekunst et al. 2014 |
| fx5Δfx5 | slr0148::kmR | non-motile GT strain | This study |
| Δfx6 | ssl2559::gmR | non-motile GT strain | This study |
| Δfx7 | sll0662::specR | non-motile GT strain | This study |
| Δfx9 | slr2059::kmR | non-motile GT strain | This study |
| ΔisiB | sll0284::gmR | non-motile GT strain | Gutekunst et al. 2014 |
| Δfx7Δfx9 | sll0662::specR, slr2059::kmR | non-motile GT strain | This study |
| Δfx7Δfx8Δfx9 | sll0662::specR,ssr3184::cmR,  slr2059::kmR | non-motile GT strain | This study |
| Δfx9ΔisiB | slr2059::kmR, sll0284::gmR | non-motile GT strain | This study |
| Δn-gogat | *sll1502::gmR* | non-motile GT strain | This study |
| Δf-gogat | *sll1499::specR* | non-motile GT strain | This study |
| ΔndhD1ΔndhD2 | slr0331::kmR, slr1291::cmR | non-motile GT strain | This study |
| Δhk | sll0593::specR | non-motile GT strain | Theune et al. 2021 |
| ΔglgP1ΔglgP2 | sll1356::kmR, slr1367::specR | non-motile GT strain | Makowka et al. 2020 |
