# Supplementary figures and images for: Pyruvate:ferredoxin oxidoreductase and low abundant ferredoxins support aerobic photomixotrophic growth in cyanobacteria
Source: eLife journal article supplement (doi:10.7554/elife.71339), 2022-02-09

Figure 3 - figure supplement 1

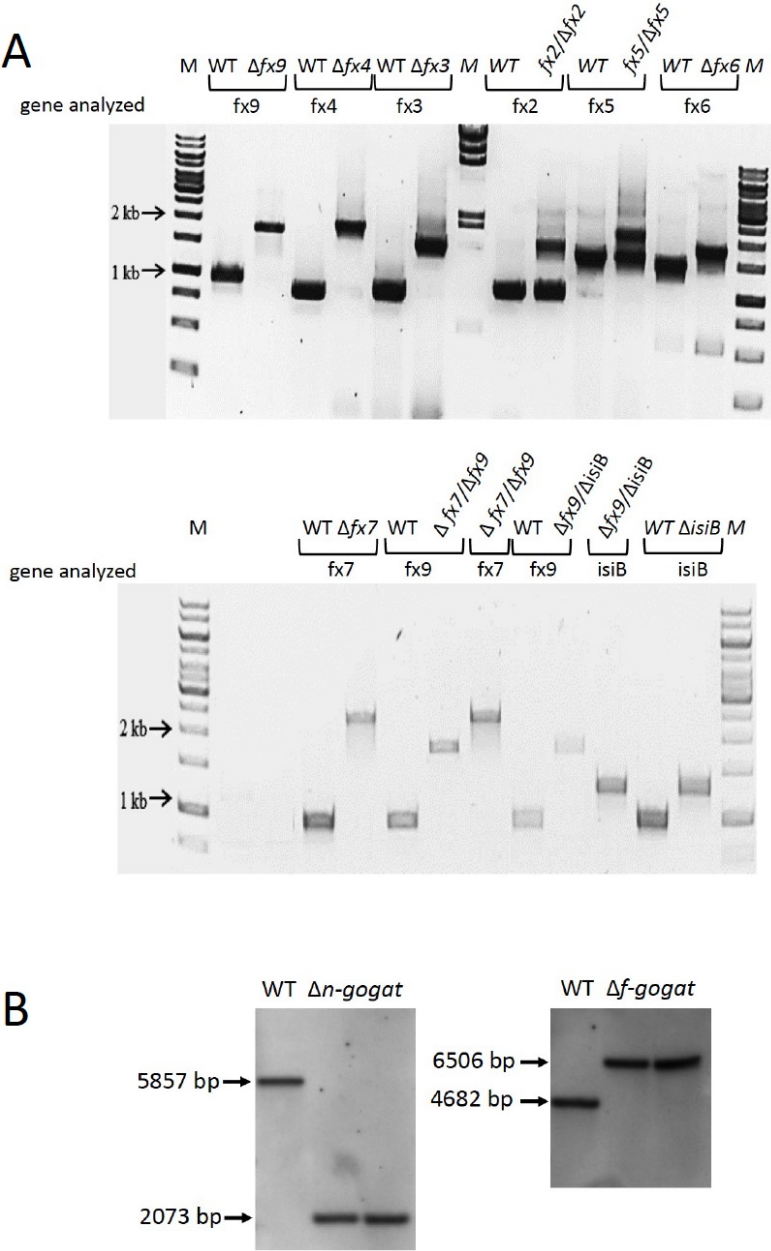

Supplement: supp [file elife-71339-supp-v1.zip]

Figure 2- figure supplement 2

A

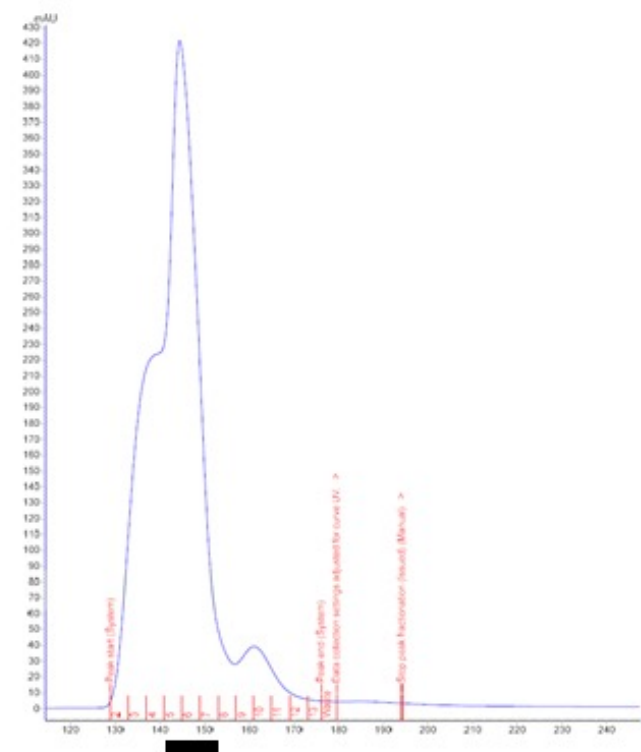

B

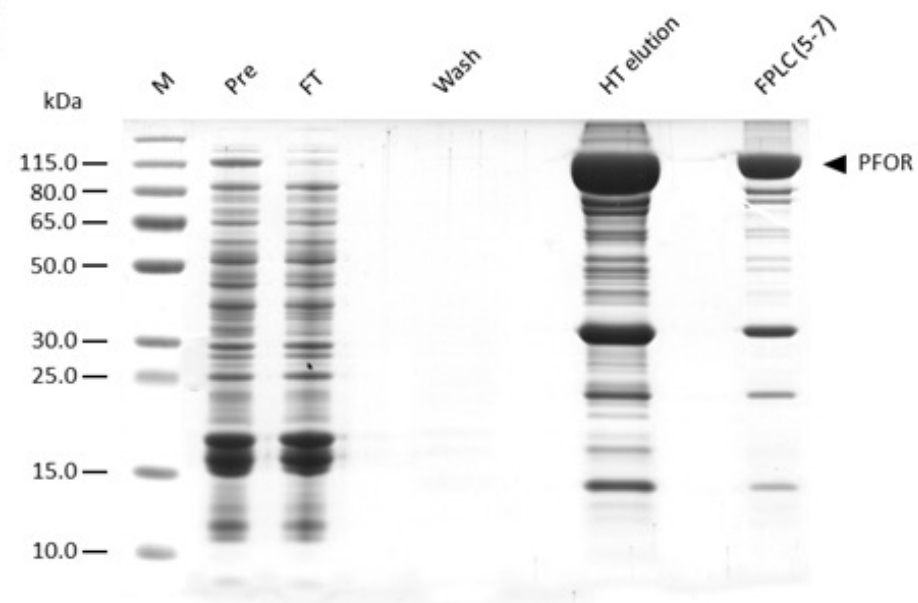

Supplement: supp [file elife-71339-supp-v1.zip]

Figure 3- figure supplement 2

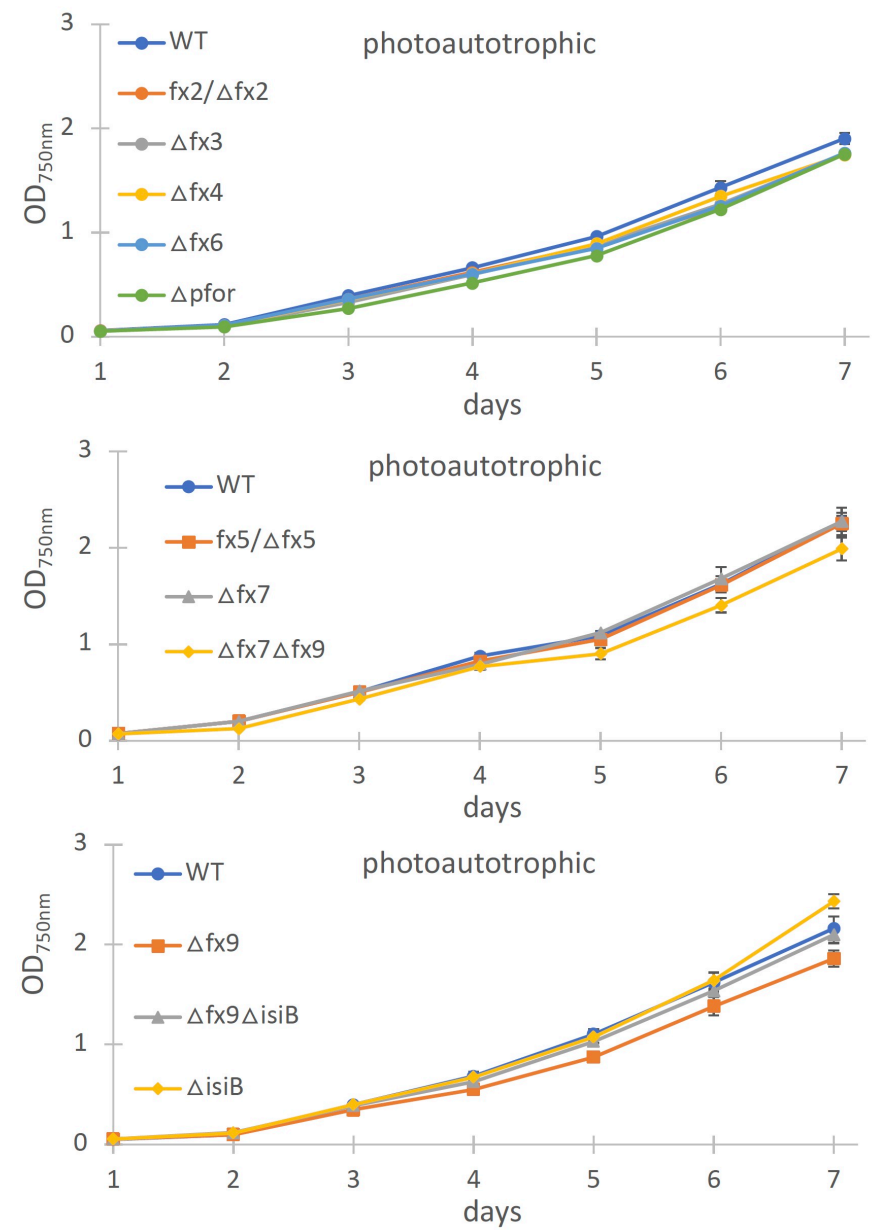

Supplement: supp [file elife-71339-supp-v1.zip]

Figure 2- figure supplement 1

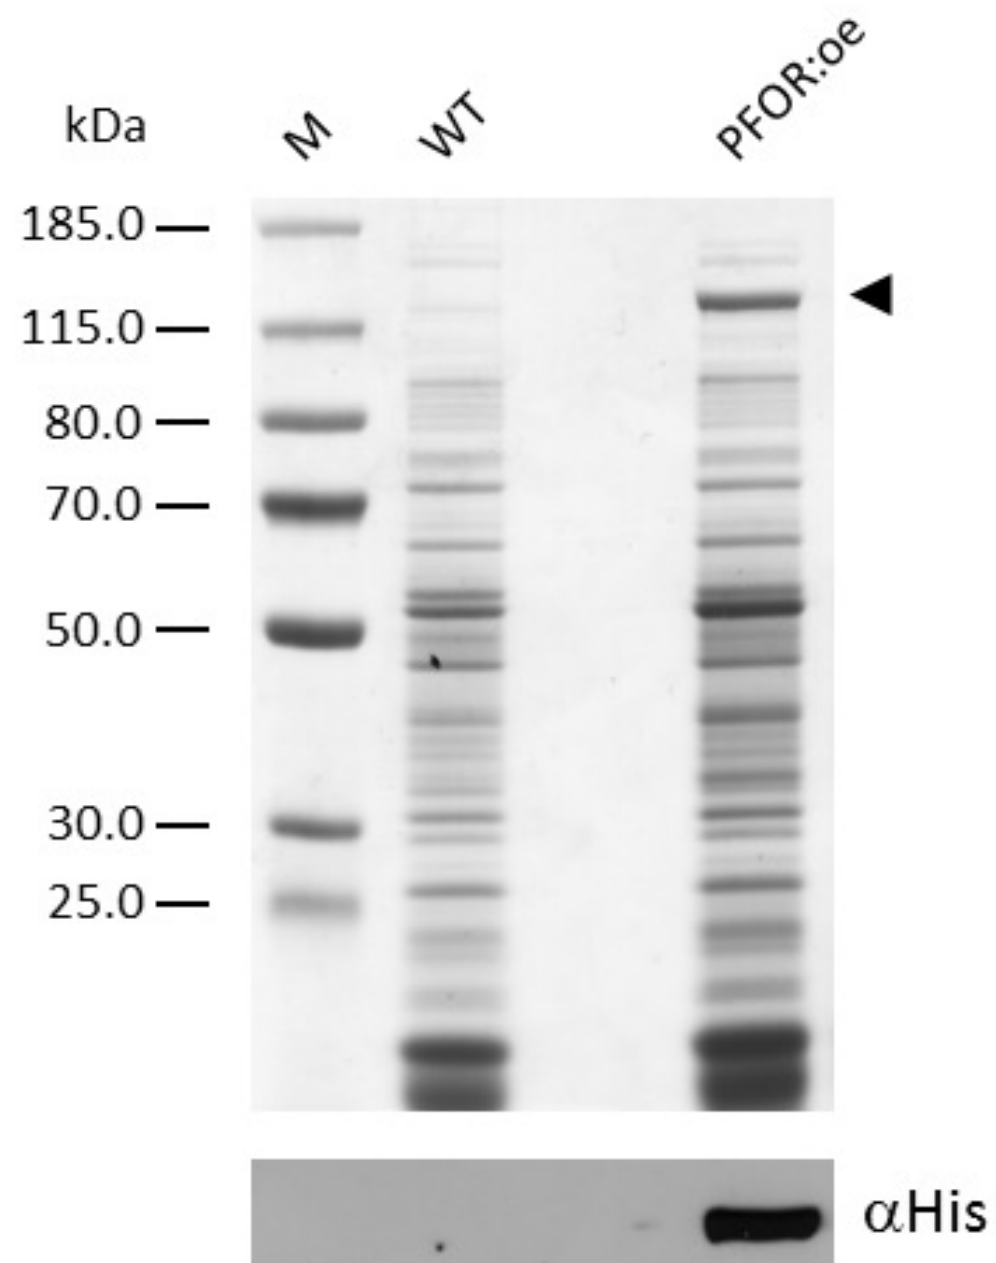

Supplement: supp [file elife-71339-supp-v1.zip]

Figure 1- figure supplement 2

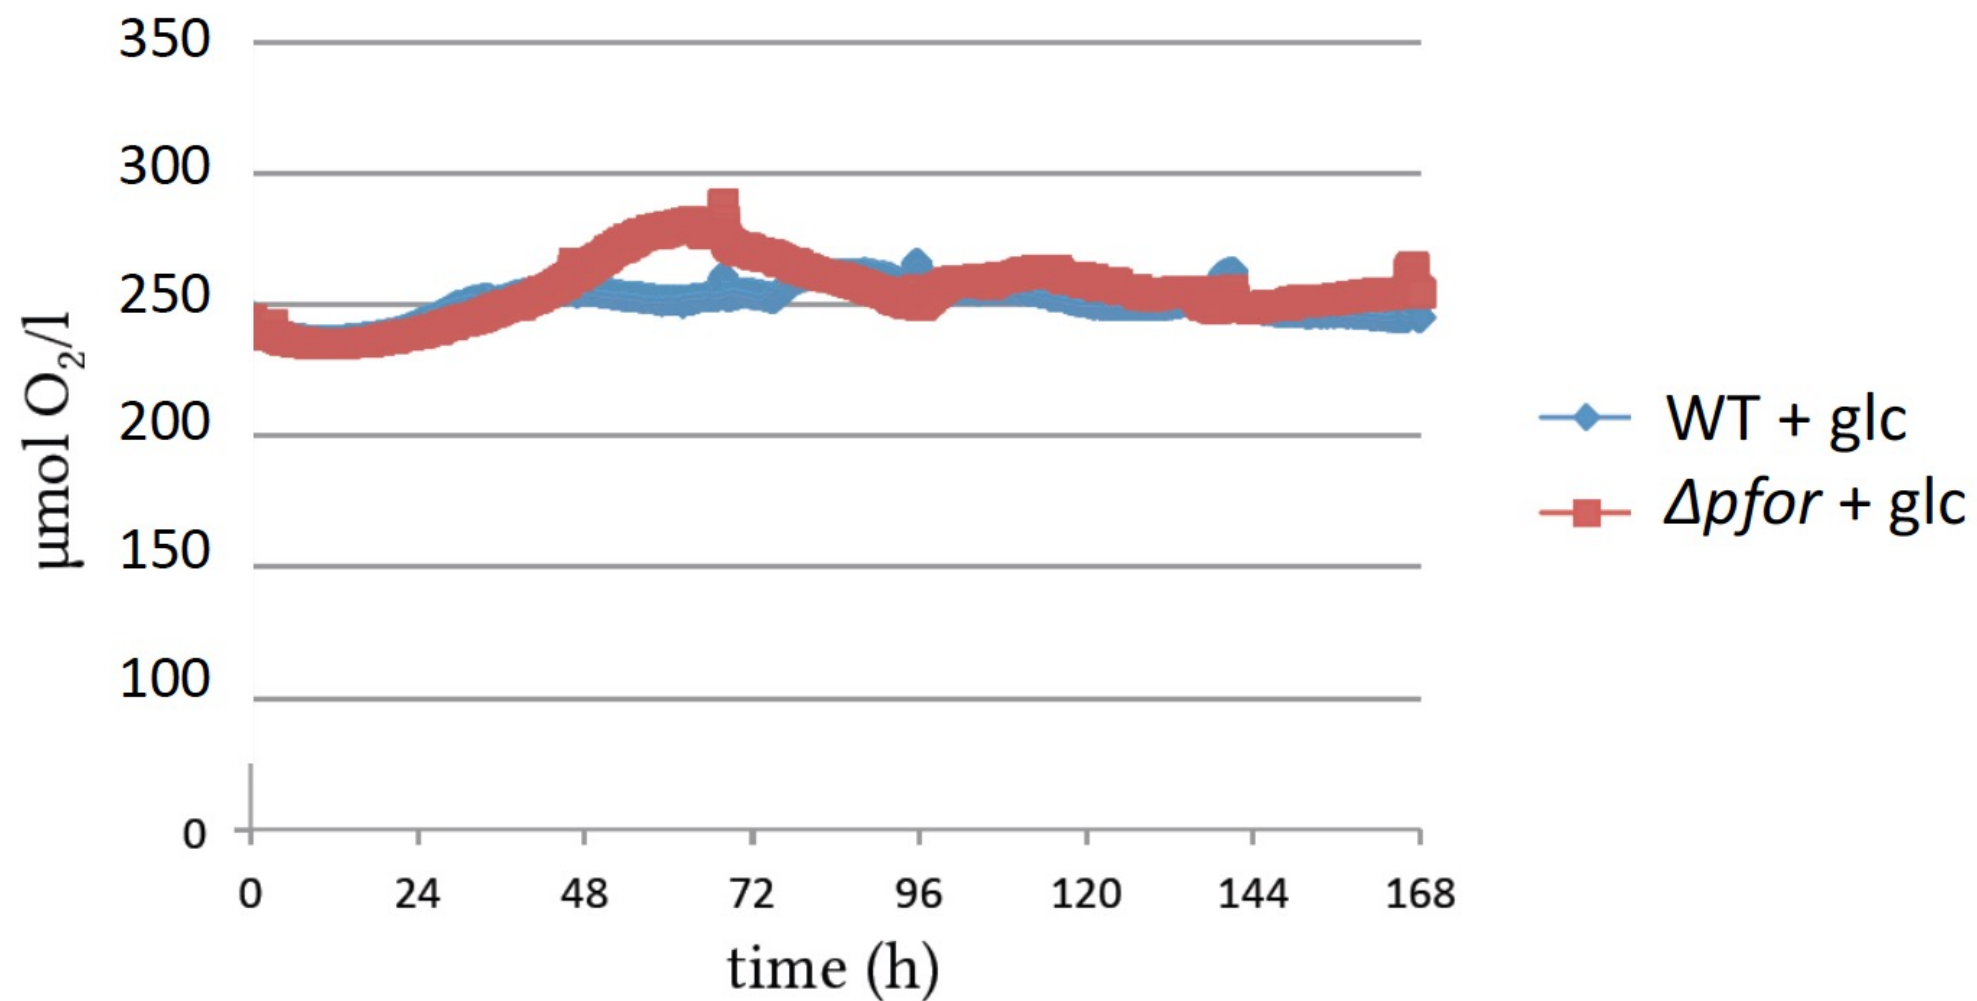

Supplement: supp [file elife-71339-supp-v1.zip]

Figure 1- figure supplement 4

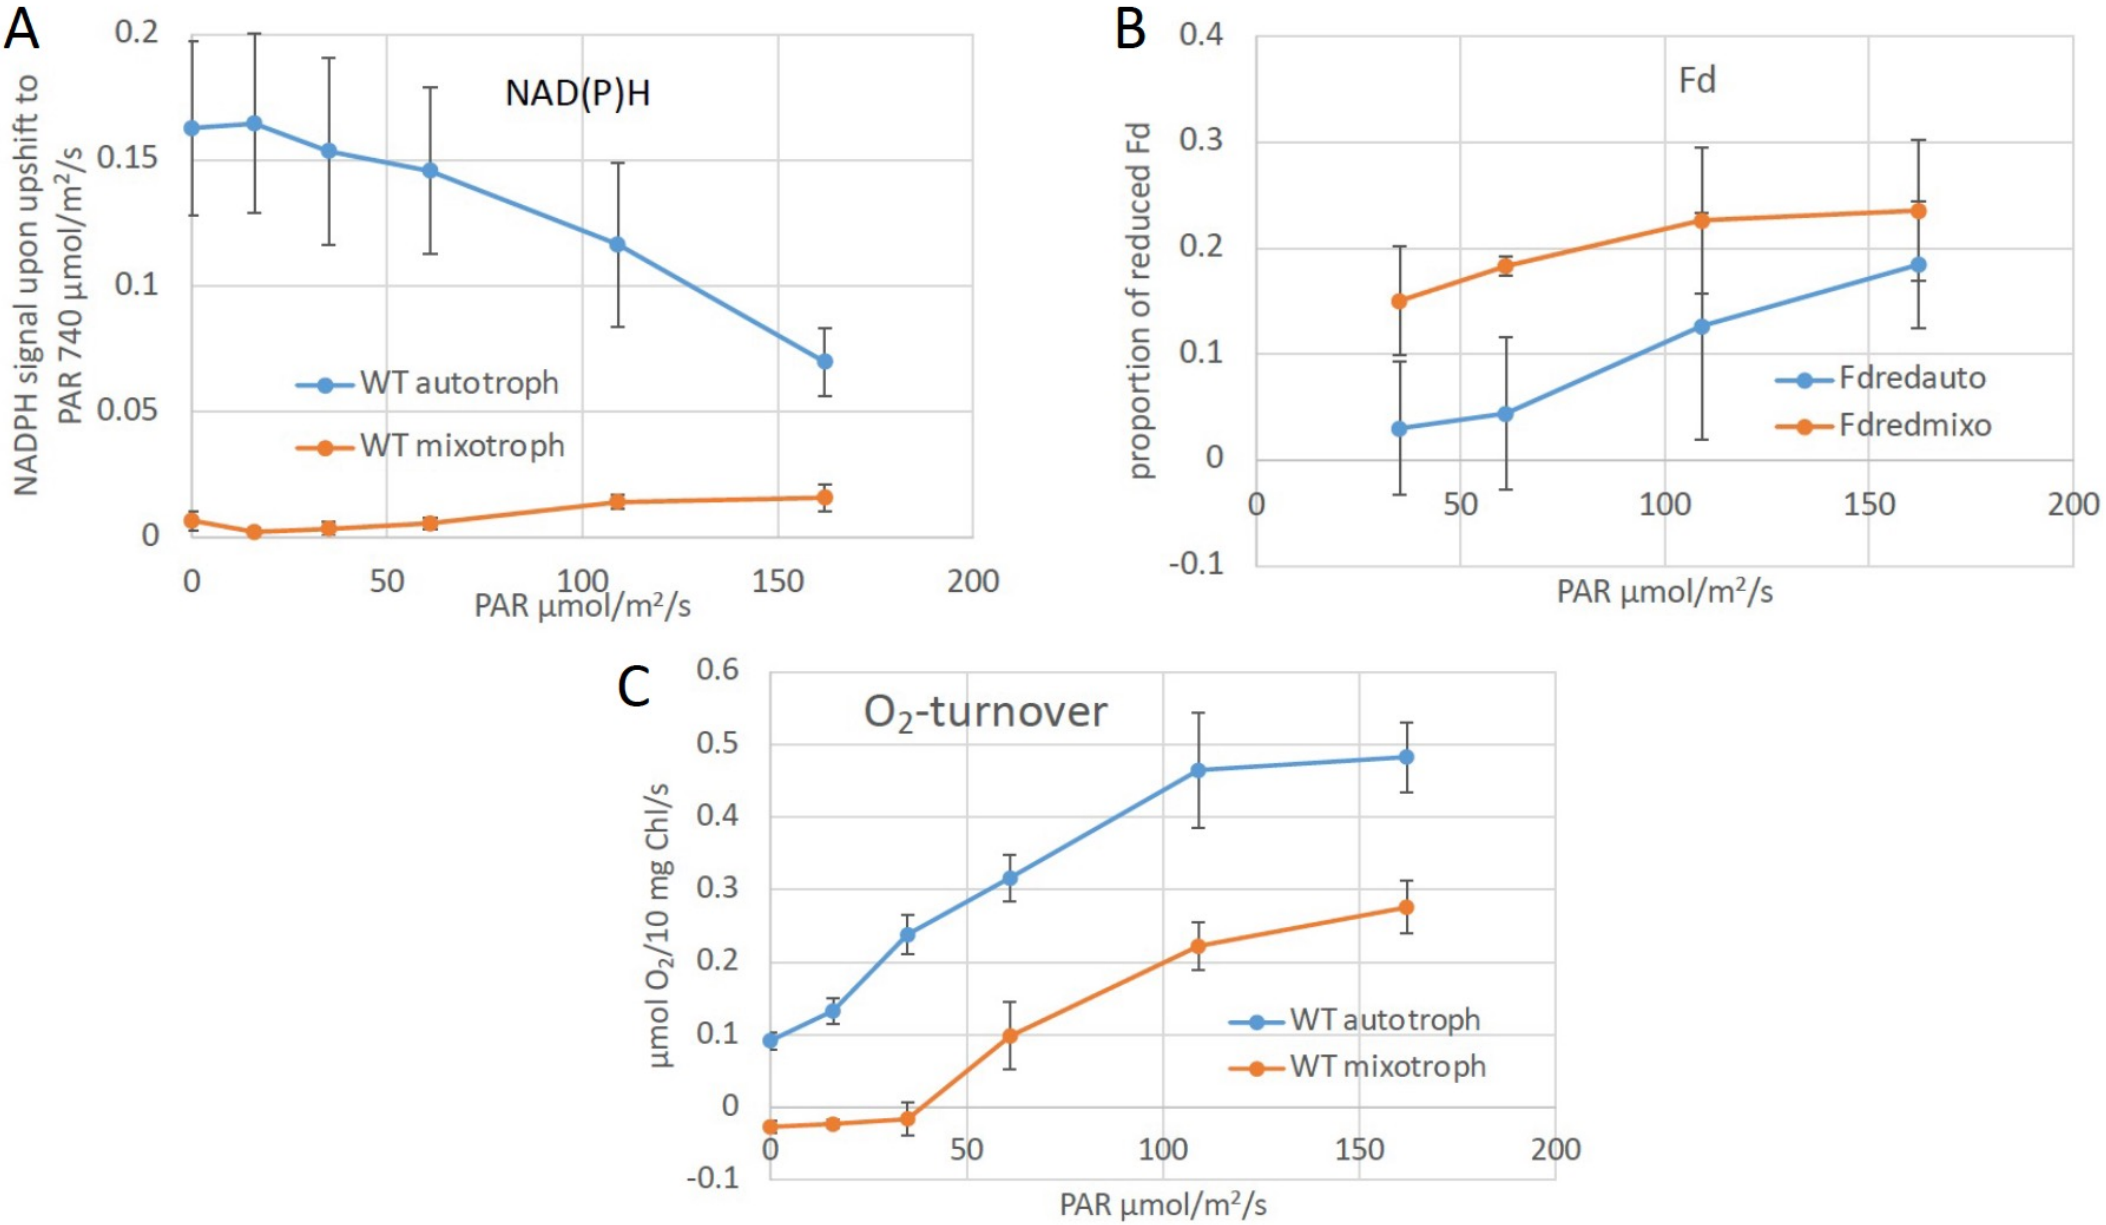

Supplement: supp [file elife-71339-supp-v1.zip]

Figure 1- figure supplement 3

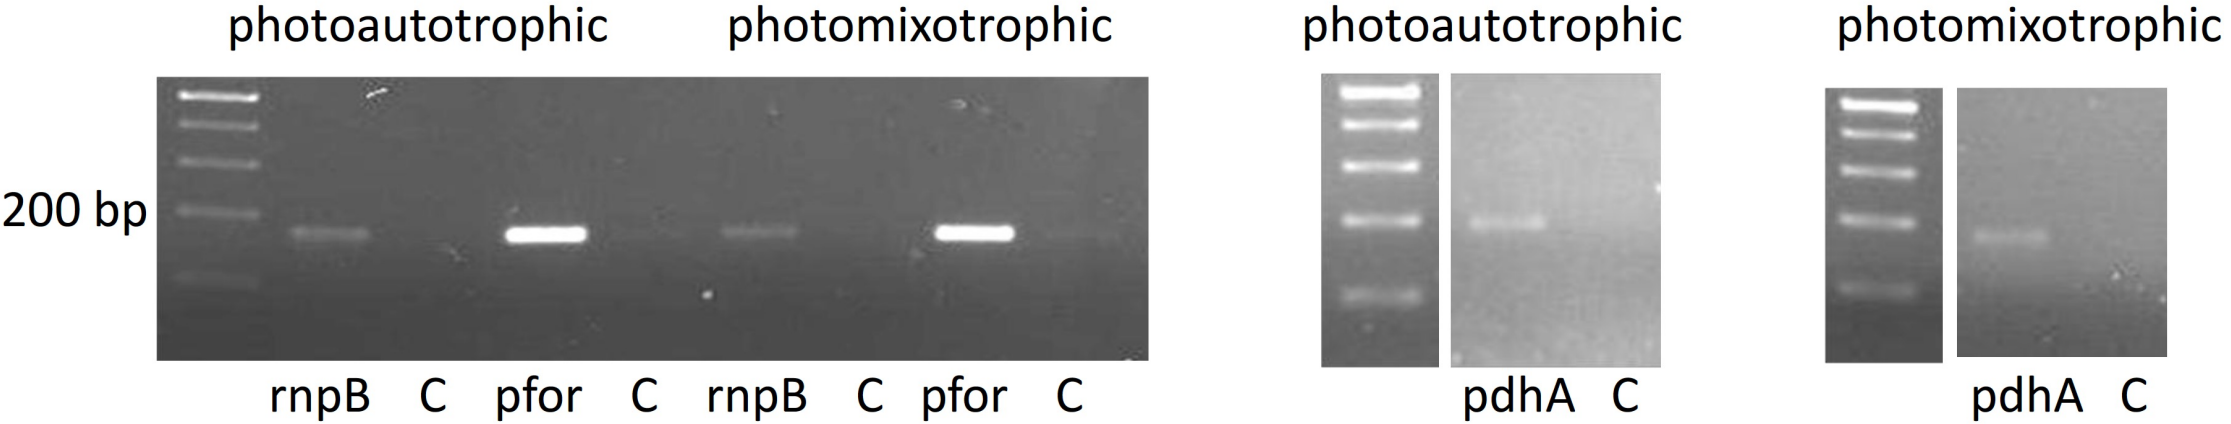

Supplement: supp [file elife-71339-supp-v1.zip]
